# Supplementary material
Source: Copernicus journal article supplement (doi:10.5194/egusphere-2026-775)
Supplement: Supplementary file 1 [file African meiofauna census data.xlsx]

## Sheet: ostracod
Sample	Samplecode	depthmin	depthmax	depthmean	Habitat_type	Human_impact	Algae_coverage	Sediment_type	Sample_weight	Location	Island	Region	Longitude	Latitude	(Neo)Caudites? sp. 1	Actinocythereis duplex	Adencythere kodalnamerensis	Adencythere spp	Aglaiella sanctamariae	Aglaiocypris complanata	Aglaiocypris sp. 2	Aglaiocypris sp. 3	Aglaiocypris spp	Aglaiocypris? sp. 1	Alatahermanites hastatus	Ambostracon sp. 1	Ambostracon sp. 2	Anchistrocheles?	Aponesidea sp. 1	Aponesidea sp. 2	Aponesidea sp. 3	Auradilus splendideornatus	Aurila convexa	Aversovalva sp. 1	Baltraella sp. 1	Berguecythere insularis	Bosasella dubia	Bosasella elongata	Bosasella gigas	Bosasella profunda	Bosasella sp. 1	Bosasella sp. 2	Bosasella sp. 3	Bosasella spp	Bradyon stellatum	Bythoceratina (Bythocythere?) sp. 1	Bythoceratina (Eucytherura?) sp. 2	Bythoceratina mandviensis	Bythoceratina sp. 3
P3	P3	3	3	3	Sand flat	Low	High	Volcanic sand	5.643	Banana Beach	Principe	West	7.44238	1.69043	0	0	0	0	0	0	0	1	0	0	0	0	0	0	0	0	0	0	0	0	0	0	0	0	0	0	0	0	0	0	0	0	0	0	0
P1	P1	4	4	4	Mangrove	Low	High	Volcanic sand	7.53	Praia Burra	Principe	West	7.43178	1.68472	0	0	0	0	48	0	0	17	0	0	0	0	0	0	0	0	0	0	0	0	0	0	0	0	0	0	0	0	0	0	0	0	0	0	0
L2	L2	1.5	1.5	1.5	Sand flat	Medium	Medium	Bioclastic sand	44.213	Libreville	Libreville	West	9.42247	0.421227	0	0	0	0	0	0	0	0	0	0	0	0	0	0	0	0	0	0	0	0	0	3	0	0	0	0	0	0	0	0	0	0	0	0	0
ST2	ST2	2	2	2	Sand flat	Low	Low	Volcanic sand	1.783	Praia de Santana	Sao Tome	West	6.74537	0.246217	0	0	0	0	0	0	0	0	0	0	0	0	0	0	0	0	0	0	0	0	0	9	0	0	0	0	0	0	0	0	0	0	0	0	0
ST12	ST12	25	25	25	Fringing reef	Low	Low	Volcanic sand	4.537	Santana Island	Sao Tome	West	6.7594	0.2431	0	0	0	0	0	0	0	0	0	0	0	0	0	0	0	0	0	0	0	0	0	3	0	0	0	0	0	0	0	0	0	0	0	0	0
ST9	ST9	24	24	24	Fringing reef	Low	Medium	Bioclastic sand	6.067	Santana Island	Sao Tome	West	6.75806	0.241744	0	0	0	0	0	0	0	0	0	0	0	0	0	0	0	0	0	0	0	0	0	0	0	0	0	0	0	0	0	0	0	0	0	0	0
ST1	ST1	12	12	12	Fringing reef	Low	Medium	Bioclastic sand	13.541	Santana Island	Sao Tome	West	6.75824	0.241283	0	0	0	0	0	0	0	0	0	0	0	0	0	0	0	0	0	0	0	0	0	13	0	0	0	0	0	0	0	0	0	0	0	0	0
ST7	ST7	8	8	8	Fringing reef	Low	Medium	Bioclastic sand	12.902	Santana Island	Sao Tome	West	6.75837	0.240775	0	0	0	0	0	0	0	0	0	0	0	0	0	0	0	0	0	0	3	0	0	13	0	0	0	0	0	0	0	0	0	0	0	0	0
ST6	ST6	18	18	18	Fringing reef	Low	Medium	Bioclastic sand	11.115	Santana Island	Sao Tome	West	6.75831	0.240461	0	0	0	0	0	0	0	0	0	0	0	0	0	0	0	0	0	0	2	0	0	11	0	0	0	0	0	0	0	0	0	0	0	0	0
ST3	ST3	30	30	30	Fringing reef	Low	Medium	Bioclastic sand	13.096	Santana Island	Sao Tome	West	6.75854	0.240078	0	0	0	0	0	0	0	0	0	0	0	0	0	0	0	0	0	0	0	0	0	2	0	0	0	0	0	0	0	0	0	0	0	0	0
ST4	ST4	0.5	0.5	0.5	Sand flat	Low	Low	Volcanic sand	8.477	Boca Inferno	Sao Tome	West	6.72255	0.211425	0	0	0	0	1	0	0	0	0	0	0	0	0	0	0	0	0	0	0	0	0	2	0	0	0	0	0	0	0	0	0	0	0	0	0
Haramu Passage 20	HP20	20	20	20	Fore reef	Low	Low	Bioclastic sand	41.936	Haramu Passage	Pemba	East	39.628	-5.0946	0	0	0	0	0	0	0	0	0	0	0	0	0	0	0	1	0	0	0	0	0	0	0	3	0	4	0	0	2	0	0	0	0	0	0
Haramu Passage 30	HP30	30	30	30	Fore reef	Low	Low	Bioclastic sand	14.246	Haramu Passage	Pemba	East	39.628	-5.0946	0	0	0	0	0	0	0	0	0	0	0	0	0	0	0	0	0	2	0	0	0	0	0	2	0	6	0	0	0	0	0	0	0	1	0
Kokota Reef 25	KR25	25	25	25	Fringing reef	Low	Low	Bioclastic sand	56.272	Kokota Reef	Pemba	East	39.6471	-5.13105	0	0	0	0	0	0	0	0	0	0	0	0	0	0	2	2	0	1	0	0	0	0	0	5	0	9	7	2	1	0	0	0	0	3	0
Kotota Reef 16	KR16	16	16	16	Fringing reef	Low	Low	Bioclastic sand	7.159	Kokota Reef	Pemba	East	39.6471	-5.13105	0	0	0	0	0	0	0	0	0	0	1	0	0	0	3	1	0	0	0	0	0	0	0	2	0	30	4	3	0	0	0	0	0	0	0
Mapenduzi Wall 40	MW40	40	40	40	Fore reef	Low	Low	Bioclastic sand	6.294	Mapenduzi Wall	Pemba	East	39.6026	-5.23339	0	0	0	0	0	0	0	0	0	0	0	0	0	0	1	4	1	0	0	0	0	0	0	6	0	19	1	1	0	0	0	0	0	3	0
Mapenduzi Wall 42	MW42	42	42	42	Fore reef	Low	Low	Bioclastic sand	8.464	Mapenduzi Wall	Pemba	East	39.6026	-5.23339	0	0	0	0	0	0	0	0	0	0	0	0	0	0	0	1	0	1	0	0	0	0	0	5	0	14	6	0	0	0	0	0	0	1	0
Misali Island 20	MI20	20	20	20	Fore reef	Low	Low	Bioclastic sand	8.616	Misali Island	Pemba	East	39.5918	-5.24563	0	0	0	0	0	0	0	0	0	0	0	0	0	0	0	0	0	1	0	0	0	0	0	2	0	31	6	2	0	0	2	0	0	0	0
RusNungwi Peak 12	RNP12	12	12	12	Fringing reef	Medium	Medium	Bioclastic sand	20.034	RusNungwi Peak	Zanzibar	East	39.3192	-5.7225	0	0	11	1	0	1	0	0	0	1	0	0	0	0	0	1	0	6	0	0	0	0	0	2	2	0	15	0	0	0	0	0	0	0	0
RusNungwi Peak 12-14	RNP12-14	12	14	13	Fringing reef	Medium	Medium	Bioclastic sand	15.193	RusNungwi Peak	Zanzibar	East	39.3192	-5.7225	0	0	0	0	0	0	0	0	0	0	0	0	0	0	0	1	0	3	0	0	0	0	0	1	0	1	24	0	0	0	0	0	0	1	0
RusNungwi Peak 20	RNP20	20	20	20	Fringing reef	Medium	Medium	Bioclastic sand	4.584	RusNungwi Peak	Zanzibar	East	39.3192	-5.7225	0	0	3	0	0	0	0	0	1	1	0	0	0	0	0	3	0	2	0	0	1	0	0	2	2	2	5	0	0	0	1	0	0	5	0
RusNungwi 16	RN16	16	16	16	Fringing reef	Medium	Medium	Bioclastic sand	10.031	RusNungwi	Zanzibar	East	39.3425	-5.74806	0	1	10	0	0	0	0	0	1	1	1	0	0	0	0	2	0	5	0	0	0	0	0	6	3	1	12	0	0	3	0	0	0	2	0
RusNungwi 20	RN20	20	20	20	Fringing reef	Medium	Medium	Bioclastic sand	4.607	RusNungwi	Zanzibar	East	39.3425	-5.74806	0	0	0	0	0	0	0	0	0	0	0	0	0	0	0	0	0	1	0	0	0	0	0	1	0	0	0	0	0	0	0	0	0	0	0
Mnemba Atoll 30	MA30	30	30	30	Fringing reef	Low	Medium	Bioclastic sand	1.924	Mnemba Atoll	Zanzibar	East	39.3939	-5.84889	0	0	0	0	0	0	0	0	0	0	0	0	0	0	0	1	0	0	0	0	0	0	0	0	0	0	0	0	0	0	0	0	0	0	0
Ocean Paradise 3	OP3	3	3	3	Back reef	Medium	High	Bioclastic sand	4	Ocean Paradise	Zanzibar	East	39.3642	-5.91833	0	2	3	0	0	0	0	0	1	4	0	0	0	0	0	0	0	5	0	0	0	0	1	0	1	3	0	0	0	2	0	0	0	0	0
Bawe Island 9-30	BI9-30	9	30	19.5	Fringing reef	Medium	High	Bioclastic sand	4.019	Bawe Island	Zanzibar	East	39.1408	-6.135	0	2	3	0	0	0	0	0	0	0	0	14	0	0	0	0	0	7	0	0	0	0	0	2	12	11	5	0	1	0	13	0	0	1	0
Bawe Island grob	BIG	9	30	19.5	Fringing reef	Medium	High	Bioclastic sand	23.553	Bawe Island	Zanzibar	East	39.1408	-6.135	0	2	1	0	0	0	0	0	0	0	0	5	0	0	0	0	0	3	0	0	0	0	0	0	14	28	2	0	1	0	10	0	0	0	0
Stone Town 12	STown12	12	12	12	Fringing reef	High	High	Bioclastic sand	2.944	Stone Town	Zanzibar	East	39.1474	-6.21368	0	11	1	0	0	13	0	0	1	0	0	6	0	0	0	0	0	1	0	0	0	0	0	0	1	5	3	0	0	0	5	1	0	19	0
Stone Town 20	STown20	20	20	20	Fringing reef	High	High	Bioclastic sand	2.277	Stone Town	Zanzibar	East	39.1474	-6.21368	0	6	2	0	0	0	0	0	0	0	0	2	0	0	0	3	0	0	0	0	0	0	0	0	13	13	2	0	1	0	11	0	0	2	0
Menai Bay 1	MB1	1	1	1	Mangrove	Medium	High	Fine-grained sand	11.318	Menai Bay	Zanzibar	East	39.3719	-6.32361	0	0	1	0	0	0	0	0	1	2	0	0	10	0	0	0	0	1	0	0	0	0	0	0	0	0	0	0	0	0	0	1	0	0	0
Kizimkazi Beach low tide 1	KB1	1	1	1	Sand flat	Low	High	Fine-grained sand	2.111	Kizimkazi Beach	Zanzibar	East	39.46	-6.43806	0	0	1	0	0	0	0	0	0	0	0	0	0	0	0	0	0	0	0	0	0	0	0	4	0	0	0	0	0	0	0	0	0	0	0
Mafia outside Chole 21	MO21	21	21	21	Fore reef	Low	Medium	Bioclastic sand	4.527	Mafia outside	Mafia	East	39.828	-7.91794	0	0	0	0	0	0	0	0	0	0	0	0	1	0	0	2	0	0	0	0	0	0	0	1	1	1	2	0	0	0	0	0	0	1	0
Mafia outside Chole 20	MO20	20	20	20	Fore reef	Low	Medium	Bioclastic sand	3.59	Mafia outside	Mafia	East	39.8224	-7.92208	0	0	0	0	0	0	0	0	0	0	0	0	1	0	1	2	0	2	0	0	0	0	2	10	5	1	6	0	0	1	0	0	1	3	1
Chole Bay 18-21	CB18-21	18	21	19.5	Back reef	Medium	Medium	Bioclastic sand	20.198	Chole Bay1	Mafia	East	39.8173	-7.94144	0	0	0	0	0	0	0	0	0	0	0	0	0	0	0	1	0	1	0	0	0	0	0	2	0	1	4	0	0	0	0	0	0	0	0
Chole Bay 15-18	CB15-18	15	18	16.5	Fringing reef	Medium	Medium	Bioclastic sand	4.33	Chole Bay2	Mafia	East	39.7871	-7.94828	2	0	1	0	0	0	0	0	1	0	0	0	0	1	1	1	0	0	0	1	0	0	6	7	2	2	5	0	0	0	0	0	0	0	1
Chole Bay 20	CB20	20	20	20	Fringing reef	Medium	Medium	Bioclastic sand	4.05	Chole Bay2	Mafia	East	39.786	-7.94911	0	0	2	0	0	0	1	0	0	0	0	0	0	0	1	2	0	0	0	0	0	0	5	0	1	7	7	0	0	0	0	0	0	0	0
Mafia Lodge 0-3	ML0-3	0	3	1.5	Fringing reef	Medium	High	Fine-grained sand	6.054	Mafia Lodge	Mafia	East	39.7479	-7.97339	0	0	0	0	0	0	5	0	0	0	0	0	3	0	0	0	0	11	0	0	0	0	0	1	2	0	1	0	0	0	0	0	0	0	0
[truncated: 271 more columns]

## Sheet: foraminifera
Sample	Samplecode	depthmin	depthmax	depthmean	Habitat_type	Human_impact	Algae_coverage	Sediment_type	Location	Island	Region	Longitude	Latitude	Acervulina mabahethi	Affinetrina cf. A. quadrilateralis	Agglutinella robusta	Alliatinella panayensis	Ammobaculites exiguus	Ammodiscus siliceus	Ammonia cf.A.aoteana	Ammonia convexa	Ammonia faceta	Ammonia parkinsoniana	Amphisorus hemprichii	Amphistegina bicirculata	Amphistegina gibbosa	Amphistegina lessonii	Amphistegina lobifera	Amphistegina papillosa	Amphistegina radiata	Anomalinella rostrata	Anomalinulla glabrata	Anomalinulla sp.1	Articulina carinata	Articulina scrobiculata	Asanonella tubulifera	Assilina (Operculina) ammonoides	Assilina (Operculina) discoidalis	Baggina? sp. A	Bolivina striatula	Borelis schlumbergeri	Brizalina ordinaria	Brizalina simpsoni	Brizalina striatula	Buchnerina sp.1	Buchnerina sp.2	Cancris bubnanensis	Cancris cf. C. carinatus	Cancris oblongus
P4	P4	3	3	3	Sand flat	Low	Medium	Bioclastic sand	Bombom Island	Principe	West	7.40232	1.69607	0	0	0	0	0	0	134	0	1	0	0	0	2	0	0	0	0	0	0	0	0	0	0	0	0	0	0	0	0	0	0	0	0	0	0	0
P3	P3	3	3	3	Sand flat	Low	High	Volcanic sand	Banana Beach	Principe	West	7.44238	1.69043	0	0	0	0	0	0	0	0	0	0	0	0	416	0	0	0	0	0	0	0	0	0	0	0	0	0	0	0	0	0	0	0	0	0	0	0
P1	P1	4	4	4	Mangrove	Low	High	Volcanic sand	Praia Burra	Principe	West	7.43178	1.68472	0	0	0	0	0	1	0	0	0	81	0	0	0	0	0	0	0	0	0	0	0	0	0	0	0	0	1	1	0	0	0	0	0	0	0	0
P2	P2	2	2	2	Sand flat	Low	Medium	Bioclastic sand	Praia Macaco	Principe	West	7.45001	1.68446	0	0	0	0	0	0	0	0	0	4	0	0	1	0	0	0	0	0	0	0	0	0	0	0	0	0	0	0	0	0	0	0	0	0	0	0
ST2	ST2	2	2	2	Sand flat	Low	Low	Volcanic sand	Praia de Santana	Sao Tome	West	6.74537	0.246217	2	0	0	0	0	0	0	0	0	109	0	0	9	0	0	0	0	0	0	0	1	0	0	0	0	0	0	0	0	0	0	0	0	0	0	0
ST9	ST9	24	24	24	Fringing reef	Low	Medium	Bioclastic sand	Santana Island	Sao Tome	West	6.75806	0.241744	3	0	0	0	0	0	0	0	0	1	0	0	282	0	0	4	0	0	0	0	0	0	0	0	0	0	0	8	0	0	0	0	0	0	0	0
ST1	ST1	12	12	12	Fringing reef	Low	Medium	Bioclastic sand	Santana Island	Sao Tome	West	6.75824	0.241283	4	0	0	0	0	0	0	0	0	0	0	0	591	0	0	5	0	0	0	1	0	0	0	0	0	0	0	4	0	0	0	0	0	0	0	0
ST7	ST7	8	8	8	Fringing reef	Low	Medium	Bioclastic sand	Santana Island	Sao Tome	West	6.75837	0.240775	0	0	0	0	0	0	0	0	0	0	0	0	311	0	0	16	0	0	0	0	0	0	0	0	0	0	0	6	0	0	0	1	1	0	0	0
ST6	ST6	18	18	18	Fringing reef	Low	Medium	Bioclastic sand	Santana Island	Sao Tome	West	6.75831	0.240461	0	0	0	0	0	0	0	0	0	0	0	0	332	0	0	11	0	0	0	0	0	0	0	0	0	0	0	9	0	0	0	0	0	0	0	1
ST3	ST3	30	30	30	Fringing reef	Low	Medium	Bioclastic sand	Santana Island	Sao Tome	West	6.75854	0.240078	2	0	0	0	0	0	0	0	0	1	0	0	521	0	0	4	0	0	0	1	0	0	0	0	0	0	0	5	0	0	0	1	0	0	0	0
ST5	ST5	3	3	3	Mangrove	Low	Low	Fine-grained sand	Aqua Ize	Sao Tome	West	6.72619	0.215669	0	0	0	0	0	0	0	0	0	0	0	0	0	0	0	0	0	0	0	0	0	0	0	0	0	0	0	0	0	0	0	0	0	0	0	0
ST4	ST4	0.5	0.5	0.5	Sand flat	Low	Low	Volcanic sand	Boca Inferno	Sao Tome	West	6.72255	0.211425	0	0	0	0	0	0	0	0	0	0	0	0	51	0	0	8	0	0	0	0	0	0	0	0	0	0	0	0	0	0	0	0	0	0	0	0
Haramu Passage 20	HP20	20	20	20	Fore reef	Low	Low	Bioclastic sand	Haramu Passage	Pemba	East	39.628	-5.0946	0	2	0	0	0	0	0	8	2	0	1	20	0	154	50	12	27	14	0	0	0	0	0	2	0	0	0	6	0	5	1	0	0	0	0	0
Haramu Passage 30	HP30	30	30	30	Fore reef	Low	Low	Bioclastic sand	Haramu Passage	Pemba	East	39.628	-5.0946	0	4	0	0	0	0	0	1	0	0	3	7	0	74	19	5	16	5	0	0	0	0	0	1	0	0	0	0	0	0	0	0	0	0	1	0
Kotota Reef 16	KR16	16	16	16	Fringing reef	Low	Low	Bioclastic sand	Kokota Reef	Pemba	East	39.6471	-5.13105	5	9	0	0	0	0	0	11	0	0	1	17	0	44	20	6	7	9	0	0	0	0	4	0	0	1	0	4	7	1	2	0	0	0	2	0
Kokota Reef 25	KR25	25	25	25	Fringing reef	Low	Low	Bioclastic sand	Kokota Reef	Pemba	East	39.6471	-5.13105	0	4	0	0	0	0	0	0	0	0	0	17	0	63	20	7	16	16	0	0	0	0	0	2	0	0	0	10	1	0	0	0	0	0	0	0
Coral Mountain 35	CM35	35	35	35	Fringing reef	Low	Low	Bioclastic sand	Coral Mountain	Pemba	East	39.5926	-5.21774	0	4	2	0	0	0	0	4	0	0	1	34	0	86	20	12	17	18	0	0	0	0	0	5	0	0	0	6	0	2	0	0	0	1	0	0
Mapenduzi Wall 40	MW40	40	40	40	Fore reef	Low	Low	Bioclastic sand	Mapenduzi Wall	Pemba	East	39.6026	-5.23339	1	0	0	0	0	0	0	0	0	0	0	26	0	56	8	14	9	10	2	0	0	0	0	7	2	0	0	5	0	5	0	0	0	0	0	0
Mapenduzi Wall 42	MW42	42	42	42	Fore reef	Low	Low	Bioclastic sand	Mapenduzi Wall	Pemba	East	39.6026	-5.23339	0	3	2	0	0	0	0	1	0	0	0	32	0	89	24	8	11	20	2	0	0	0	1	2	1	0	0	9	1	2	0	0	0	1	4	0
Misali Island 20	MI20	20	20	20	Fore reef	Low	Low	Bioclastic sand	Misali Island	Pemba	East	39.5918	-5.24563	0	9	3	0	0	0	0	1	0	0	1	57	0	140	27	13	16	21	0	0	0	0	3	5	0	0	0	21	2	12	3	0	0	0	1	0
RusNungwi Peak 12	RNP12	12	12	12	Fringing reef	Medium	Medium	Bioclastic sand	RusNungwi Peak	Zanzibar	East	39.3192	-5.7225	0	0	0	0	0	0	0	0	0	0	6	0	0	105	142	0	1	12	0	0	0	0	0	0	0	0	0	4	0	3	0	0	0	0	0	0
RusNungwi Peak 12-14	RNP12-14	12	14	13	Fringing reef	Medium	Medium	Bioclastic sand	RusNungwi Peak	Zanzibar	East	39.3192	-5.7225	0	2	0	0	0	0	0	0	0	0	19	1	0	89	261	0	2	9	0	0	0	0	0	0	0	0	0	7	1	13	0	0	0	0	0	0
RusNungwi Peak 20	RNP20	20	20	20	Fringing reef	Medium	Medium	Bioclastic sand	RusNungwi Peak	Zanzibar	East	39.3192	-5.7225	0	1	0	0	0	0	0	0	0	0	7	8	0	109	191	0	7	7	0	0	0	0	0	0	0	0	0	5	19	3	0	0	0	0	0	0
RusNungwi 16	RN16	16	16	16	Fringing reef	Medium	Medium	Bioclastic sand	RusNungwi	Zanzibar	East	39.3425	-5.74806	1	0	0	0	0	0	0	0	0	0	8	12	0	77	97	0	5	11	0	0	0	0	0	1	3	0	0	8	0	1	0	0	0	0	0	0
RusNungwi 20	RN20	20	20	20	Fringing reef	Medium	Medium	Bioclastic sand	RusNungwi	Zanzibar	East	39.3425	-5.74806	0	0	1	0	0	0	0	0	0	0	9	4	0	94	219	0	2	14	0	0	0	0	0	1	0	0	0	5	0	1	0	0	0	0	0	0
Mnemba Atoll 15	MA15	15	15	15	Fringing reef	Low	Medium	Bioclastic sand	Mnemba Atoll	Zanzibar	East	39.3939	-5.84889	0	0	0	0	0	0	0	0	0	0	0	18	0	29	18	1	1	5	0	0	0	0	0	4	3	0	0	2	0	2	0	0	0	1	0	0
Mnemba Atoll 20	MA20	20	20	20	Fringing reef	Low	Medium	Bioclastic sand	Mnemba Atoll	Zanzibar	East	39.3939	-5.84889	0	0	0	0	0	0	0	0	0	0	0	4	0	11	7	0	0	1	0	0	0	0	0	0	0	0	0	1	0	0	0	0	0	0	0	0
Mnemba Atoll 30	MA30	30	30	30	Fringing reef	Low	Medium	Bioclastic sand	Mnemba Atoll	Zanzibar	East	39.3939	-5.84889	12	0	0	0	0	0	0	0	0	0	0	3	0	23	3	0	0	0	0	0	0	0	0	0	0	0	0	0	0	0	0	0	0	0	0	0
Ocean Paradise 3	OP3	3	3	3	Back reef	Medium	High	Bioclastic sand	Ocean Paradise	Zanzibar	East	39.3642	-5.91833	1	1	0	0	1	0	0	25	0	0	0	0	0	3	3	0	0	0	0	0	0	0	0	0	0	0	0	0	0	0	0	0	0	0	0	0
Bawe Island 9-30	BI9-30	9	30	19.5	Fringing reef	Medium	High	Bioclastic sand	Bawe Island	Zanzibar	East	39.1408	-6.135	1	5	0	0	0	0	0	2	0	0	1	19	0	73	53	8	14	0	0	0	0	0	0	8	37	0	0	23	0	6	0	0	0	0	0	0
Stone Town 12	STown12	12	12	12	Fringing reef	High	High	Bioclastic sand	Stone Town	Zanzibar	East	39.1474	-6.21368	2	7	0	0	0	0	0	2	0	0	0	45	0	64	10	0	2	1	0	0	0	0	0	1	10	0	0	1	1	2	0	0	0	0	0	0
Stone Town 20	STown20	20	20	20	Fringing reef	High	High	Bioclastic sand	Stone Town	Zanzibar	East	39.1474	-6.21368	0	1	0	1	0	0	0	1	1	0	0	91	0	71	36	2	6	0	0	0	0	1	2	6	19	0	0	13	1	23	0	0	0	0	0	0
Menai Bay 1	MB1	1	1	1	Mangrove	Medium	High	Fine-grained sand	Menai Bay	Zanzibar	East	39.3719	-6.32361	0	2	0	0	0	0	0	149	0	0	0	0	0	7	41	0	1	1	0	0	0	0	0	2	0	0	0	0	0	0	0	0	0	0	0	0
Kizimkazi Beach low tide 1	KB1	1	1	1	Sand flat	Low	High	Fine-grained sand	Kizimkazi Beach	Zanzibar	East	39.46	-6.43806	0	0	0	0	0	0	0	22	0	0	0	6	0	61	5	0	0	0	0	0	0	0	0	0	0	0	0	0	0	3	0	0	0	0	0	0
Jina Reef 20	JR20	20	20	20	Fringing reef	Low	Medium	Bioclastic sand	Jina Reef	Mafia	East	39.8253	-7.91974	3	0	0	0	0	0	0	2	0	0	0	25	0	48	32	0	1	6	0	0	0	0	0	1	0	0	0	2	0	1	0	0	0	0	0	0
Jina Reef 21	JR21	21	21	21	Fringing reef	Low	Medium	Bioclastic sand	Jina Reef	Mafia	East	39.8253	-7.91974	1	0	0	0	0	0	0	1	0	0	3	28	0	103	47	1	1	16	0	0	0	0	0	0	0	0	0	13	0	2	0	0	0	0	0	0
Chole Bay 18-21	CB18-21	18	21	19.5	Back reef	Medium	Medium	Bioclastic sand	Chole Bay1	Mafia	East	39.8173	-7.94145	0	1	0	1	0	0	0	0	0	0	0	56	0	226	51	4	4	5	0	0	0	0	1	1	0	0	0	7	1	2	0	0	0	0	0	0
Chole Bay 15-18	CB15-18	15	18	16.5	Fringing reef	Medium	Medium	Bioclastic sand	Chole Bay2	Mafia	East	39.7865	-7.94863	0	1	1	0	0	0	0	2	0	0	4	81	0	195	116	11	9	14	0	0	0	0	0	6	7	0	0	14	0	1	0	0	0	0	0	0
Chole Bay 20	CB20	20	20	20	Fringing reef	Medium	Medium	Bioclastic sand	Chole Bay2	Mafia	East	39.7865	-7.94863	2	0	0	0	0	0	0	1	0	0	0	36	0	94	60	7	1	10	0	0	0	0	0	1	0	0	0	2	1	2	2	0	0	0	0	0
[truncated: 215 more columns]
