# Supplementary material
Source: Copernicus journal article supplement (doi:10.5194/egusphere-2026-775)
Supplement: Supplementary file 1 [file supplement.pdf › supplement.pdf]

# Supplementary materials

Table S1. Environmental controls of ostracod and foraminifera alpha diversity ( $q=0$  and  $q=2$ ) in Zanzibar, East Africa. Statistics from GAMM modelling showing the significant parameters in the averaged top model. RI: relative importance; L: linear term; Q: quadratic term.

| Organism     | Order.q | Term                       | Estimate | Std. Error | t value  | Pr(> t )  | RI       |
|--------------|---------|----------------------------|----------|------------|----------|-----------|----------|
| Ostracod     | 0       | (Intercept)                | 3.886274 | 0.046391   | 83.77293 | 0         |          |
|              |         | Sediment Fine-grained sand | -0.68357 | 0.258644   | -2.64288 | 0.014249* | 0.546562 |
|              | 2       | (Intercept)                | 3.248227 | 0.069692   | 46.60837 | 0         |          |
|              |         | Habitat Fringing reef      | -0.07999 | 0.086699   | -0.92264 | 0.366674  | 0.95763  |
|              |         | Habitat Back reef          | -0.8706  | 0.3191     | -2.7283  | 0.012593* | 0.95763  |
|              |         | Habitat Sand flat          | -0.53711 | 0.323102   | -1.66234 | 0.111299  | 0.95763  |
|              |         | Habitat Mangrove           | -2.11057 | 1.523336   | -1.38549 | 0.180442  | 0.95763  |
| Foraminifera | 0       | (Intercept)                | 4.399923 | 0.245562   | 17.91775 | 0         |          |
|              |         | Human impact. L            | 0.51031  | 0.112898   | 4.520082 | 0.000168* | 0.79177  |
|              |         | Human impact. Q            | 0.148077 | 0.083972   | 1.763401 | 0.091664  | 0.79177  |
|              | 2       | (Intercept)                | 2.77883  | 0.307554   | 9.03526  | 1E-07     |          |
|              |         | Algae coverage. L          | -0.05968 | 0.46942    | -0.12715 | 0.900278  | 0.964998 |
|              |         | Algae coverage. Q          | 1.25216  | 0.317651   | 3.941936 | 0.001006* | 0.964998 |

Table S2. Environmental controls of ostracod and foraminifera faunal composition ( $q=0$  and  $q=2$ ) in two regions by dbRDA analysis. Only significant effects are shown.

| Organism | Region             | Order.q | Predictor      | SumOfSqs | F      | Pr(>F)   |
|----------|--------------------|---------|----------------|----------|--------|----------|
| Ostracod | Zanzibar, E Africa | 0       | Habitat type   | 1.20522  | 2.8471 | 0.001*** |
|          |                    |         | Human impact   | 0.49872  | 2.3562 | 0.001*** |
|          |                    |         | Algae coverage | 0.6979   | 3.2973 | 0.001*** |
|          |                    | 2       | Habitat type   | 2.01444  | 6.8674 | 0.001*** |
|          |                    |         | Human impact   | 0.74315  | 5.0669 | 0.001*** |
|          |                    |         | Algae coverage | 1.18334  | 8.0682 | 0.001*** |
|          |                    |         | dist2land      | 0.17267  | 2.3546 | 0.026*   |

|              |                    |   |                |         |          |              |
|--------------|--------------------|---|----------------|---------|----------|--------------|
|              | STP, W Africa      | 0 | Habitat type   | 0.33888 | 2.0385   | 0.034<br>*   |
|              |                    |   | Algae coverage | 0.21861 | 2.6301   | 0.012<br>*   |
|              |                    | 2 | Habitat type   | 0.59761 | 114.4319 | 0.002<br>**  |
|              |                    |   | Human impact   | 0.42577 | 163.053  | 0.001<br>*** |
|              |                    |   | Algae coverage | 0.38738 | 148.353  | 0.002<br>**  |
|              |                    |   |                |         |          |              |
| Foraminifera | Zanzibar, E Africa | 0 | Habitat type   | 0.55557 | 2.2109   | 0.001<br>*** |
|              |                    |   | Human impact   | 0.21227 | 1.6894   | 0.044<br>*   |
|              |                    |   | Algae coverage | 0.38739 | 3.0832   | 0.001<br>*** |
|              |                    | 2 | Habitat type   | 1.43859 | 10.1082  | 0.001<br>*** |
|              |                    |   | Human impact   | 1.03596 | 14.5582  | 0.001<br>*** |
|              |                    |   | Algae coverage | 1.36782 | 19.2217  | 0.001<br>*** |
|              |                    |   | dist2land      | 0.14174 | 3.9838   | 0.014<br>*   |
|              |                    |   |                |         |          |              |
|              | STP, W Africa      | 0 | Habitat type   | 0.94915 | 3.6005   | 0.001<br>*** |
|              |                    |   | Algae coverage | 0.55279 | 2.097    | 0.031<br>*   |
|              |                    |   | Sediment type  | 0.42095 | 3.1937   | 0.007<br>**  |
|              |                    |   | dist2land      | 0.32701 | 2.481    | 0.016<br>*   |
|              |                    | 2 | Habitat type   | 1.9065  | 6.5705   | 0.011<br>*   |

Table S3. The autoecology summary of the top 10 ostracod genera of highest mean relative abundance in each cluster ( $q=1$ ) in two regions.

| Genus                 | Ecology | References                                                                               |
|-----------------------|---------|------------------------------------------------------------------------------------------|
| <i>Neonesidea</i>     | Reefal  | (Whatley and Watson, 1988; Maddocks, 2013; Titterton and Whatley, 1988; Maddocks, 1969a) |
| <i>Paranesidea</i>    | Reefal  | (Whatley and Watson, 1988; Titterton and Whatley, 1988; Maddocks, 1969a)                 |
| <i>Macrocyprina</i>   | Reefal  | (Maddocks, 1990)                                                                         |
| <i>Glyptobairdia</i>  | Reefal  | (Maddocks, 1969a)                                                                        |
| <i>Mydionobairdia</i> | Reefal  | (Maddocks, 1969a)                                                                        |
| <i>Kotoracythere</i>  | Reefal  | (Sridhar et al., 2007)                                                                   |
| <i>Xestoleberis</i>   | Phytal  | (Keyser and Mohammed, 2021; Munef et al., 2012; Kamiya, 1988)                            |
| <i>Loxoconcha</i>     | Phytal  | (Keyser and Mohammed, 2021; Munef et al., 2012; Kamiya, 1988)                            |
| <i>Loxocorniculum</i> | Phytal  | (Kamiya, 1988; Munef et al., 2012)                                                       |

|                           |                 |                                          |
|---------------------------|-----------------|------------------------------------------|
| <i>Propontocypris</i>     | Phytal          | (Maddocks, 1969b)                        |
| <i>Paracytheridea</i>     | Bottom-dwelling | (Purper and De Orenellas, 1987)          |
| <i>Bosasella</i>          | Bottom-dwelling | (Kamiya, 1988; Munef et al., 2012)       |
| <i>Hermarnites</i>        | Bottom-dwelling | (Kamiya, 1988; Omatsola, 1972)           |
| <i>Perissocytheridea</i>  | Brackish        | (Nogueira and Ramos, 2016; Keyser, 1977) |
| <i>Cyprideis</i>          | Brackish        | (Wouters, 2017, 2003)                    |
| <i>Caudites</i>           | Non-specific    |                                          |
| <i>Hiltermannicythere</i> | Non-specific    |                                          |
| <i>Callistocythere</i>    | Non-specific    |                                          |
| <i>Neohornibrookella</i>  | Non-specific    |                                          |
| <i>Patrizia</i>           | Non-specific    |                                          |
| <i>Berguecythere</i>      | Non-specific    |                                          |
| <i>Neocaudites</i>        | Non-specific    |                                          |
| <i>Polycopse</i>          | Non-specific    |                                          |
| <i>Neomonoceratina</i>    | Non-specific    |                                          |
| <i>Aglaiella</i>          | Non-specific    |                                          |
| <i>Puriana</i>            | Non-specific    |                                          |

Table S4. The occurrence of STP ostracod species in all tropical Atlantic provinces. 1 indicates presence. NWA: Northwestern Atlantic; SWA: Southwestern Atlantic; NEA: Northeastern Atlantic; TEA: Tropical East Atlantic; SEA: Southeastern Atlantic.

| species                            | NWA | SWA | NEA | TEA | SEA |
|------------------------------------|-----|-----|-----|-----|-----|
| <i>Aglaiella sanctamariae</i>      |     |     |     | 1   |     |
| <i>Aurila convexa</i>              |     |     | 1   |     |     |
| <i>Berguecythere insularis</i>     |     | 1   |     |     |     |
| <i>Cativella iyemojai</i>          |     |     |     | 1   |     |
| <i>Copytus fusiformis</i>          |     |     |     | 1   |     |
| <i>Cyprideis nigeriensis</i>       |     |     |     | 1   |     |
| <i>Cyprideis torosa</i>            |     |     | 1   | 1   |     |
| <i>Cytherella adenensis</i>        |     |     |     |     |     |
| <i>Cytherella cf. omatsolai</i>    |     |     |     |     | 1   |
| <i>Eucytherura mistrettai</i>      |     |     | 1   |     |     |
| <i>Hermanites macrodictyota</i>    |     |     |     | 1   |     |
| <i>Hermanites batei</i>            |     |     |     | 1   |     |
| <i>Keijia demissa</i>              | 1   | 1   |     | 1   |     |
| <i>Kotoracythere inconspicua</i>   | 1   | 1   |     | 1   |     |
| <i>Loxoconcha bullata</i>          |     | 1   |     |     |     |
| <i>Loxoconcha rhomboidea</i>       |     |     | 1   |     |     |
| <i>Loxocorniculum tricornatum</i>  | 1   | 1   |     |     |     |
| <i>Mutilus nigeriana</i>           |     |     |     | 1   |     |
| <i>Neocaudites atlantica</i>       | 1   |     |     | 1   |     |
| <i>Neocaudites purii</i>           |     |     |     | 1   |     |
| <i>Neocaudites rectangularis</i>   |     |     |     | 1   |     |
| <i>Neocaudites triplistriatus</i>  | 1   | 1   |     |     |     |
| <i>Neocaudites tuberculatus</i>    |     |     |     | 1   |     |
| <i>Neomonoceratina iddoensis</i>   |     |     |     | 1   |     |
| <i>Neomonoceratina porocostata</i> |     |     |     |     |     |

|                                         |   |   |   |   |   |
|-----------------------------------------|---|---|---|---|---|
| <i>Neonesidea schulzi</i>               |   |   | 1 |   | 1 |
| <i>Paracytheridea tschoppi</i>          | 1 | 1 |   | 1 |   |
| <i>Paranesidea multiforma</i>           |   |   |   | 1 |   |
| <i>Phacorhabdotus hazeli</i>            |   |   |   | 1 |   |
| <i>Puriana</i> aff. <i>interrasilis</i> |   |   |   | 1 |   |
| <i>Reymentia microdictyota</i>          |   |   |   | 1 |   |
| <i>Sclerochilus hicksi</i>              |   |   | 1 |   |   |
| <i>Triebelina sertata</i>               | 1 | 1 |   |   |   |
| <i>Triebelina intermedia</i>            |   |   |   | 1 |   |
| <i>Xestoleberis hanaii</i>              |   |   |   |   |   |
| <i>Xestoleberis lenae</i>               |   |   |   | 1 |   |
| <i>Xestoleberis rotunda</i>             |   |   |   |   | 1 |
| <i>Xestoleberis rubens</i>              |   |   | 1 |   |   |

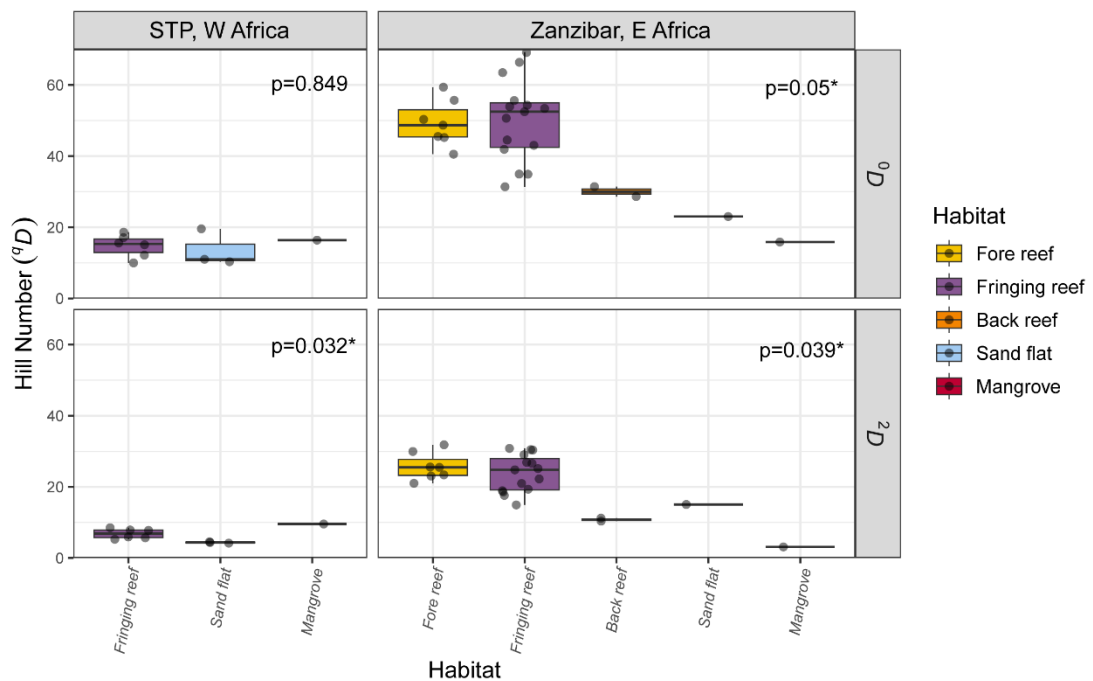

Fig. S1. Box plots showing variations in ostracod alpha diversity between habitat types for orders  $q=0$  and  $q=2$  in STP and Zanzibar regions. p-value given by the Kruskal-Wallis test.

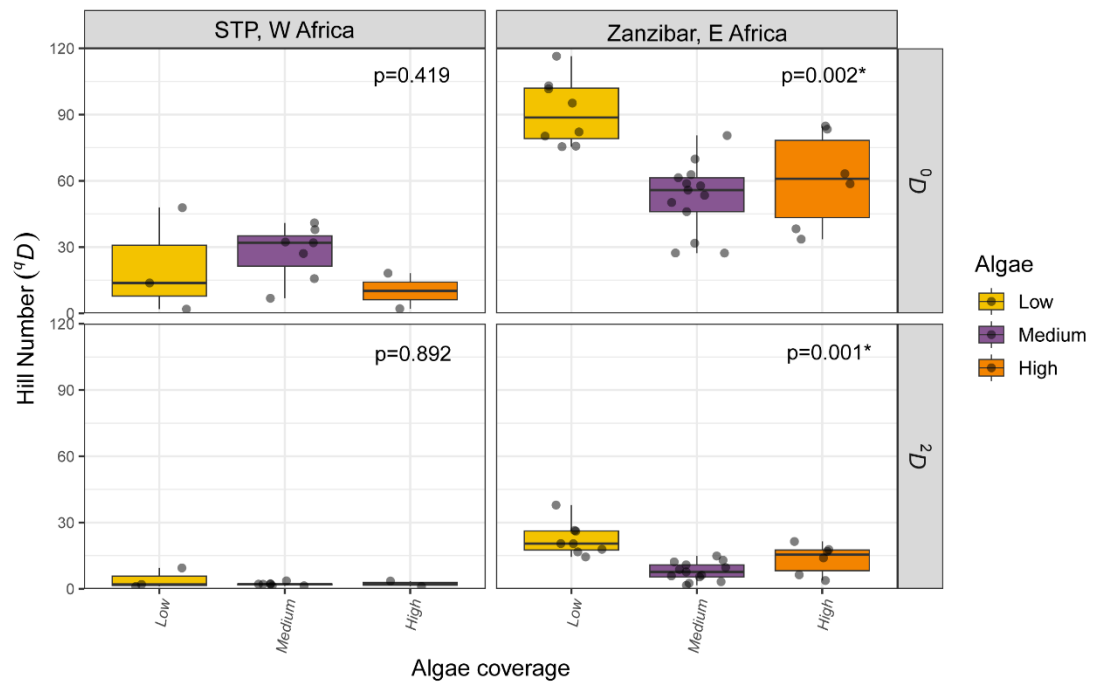

Fig. S2. Box plots showing variations in foraminifera alpha diversity between algae coverage levels for orders  $q=0$  and  $q=2$  in STP and Zanzibar regions. p-value given by the Kruskal-Wallis test.

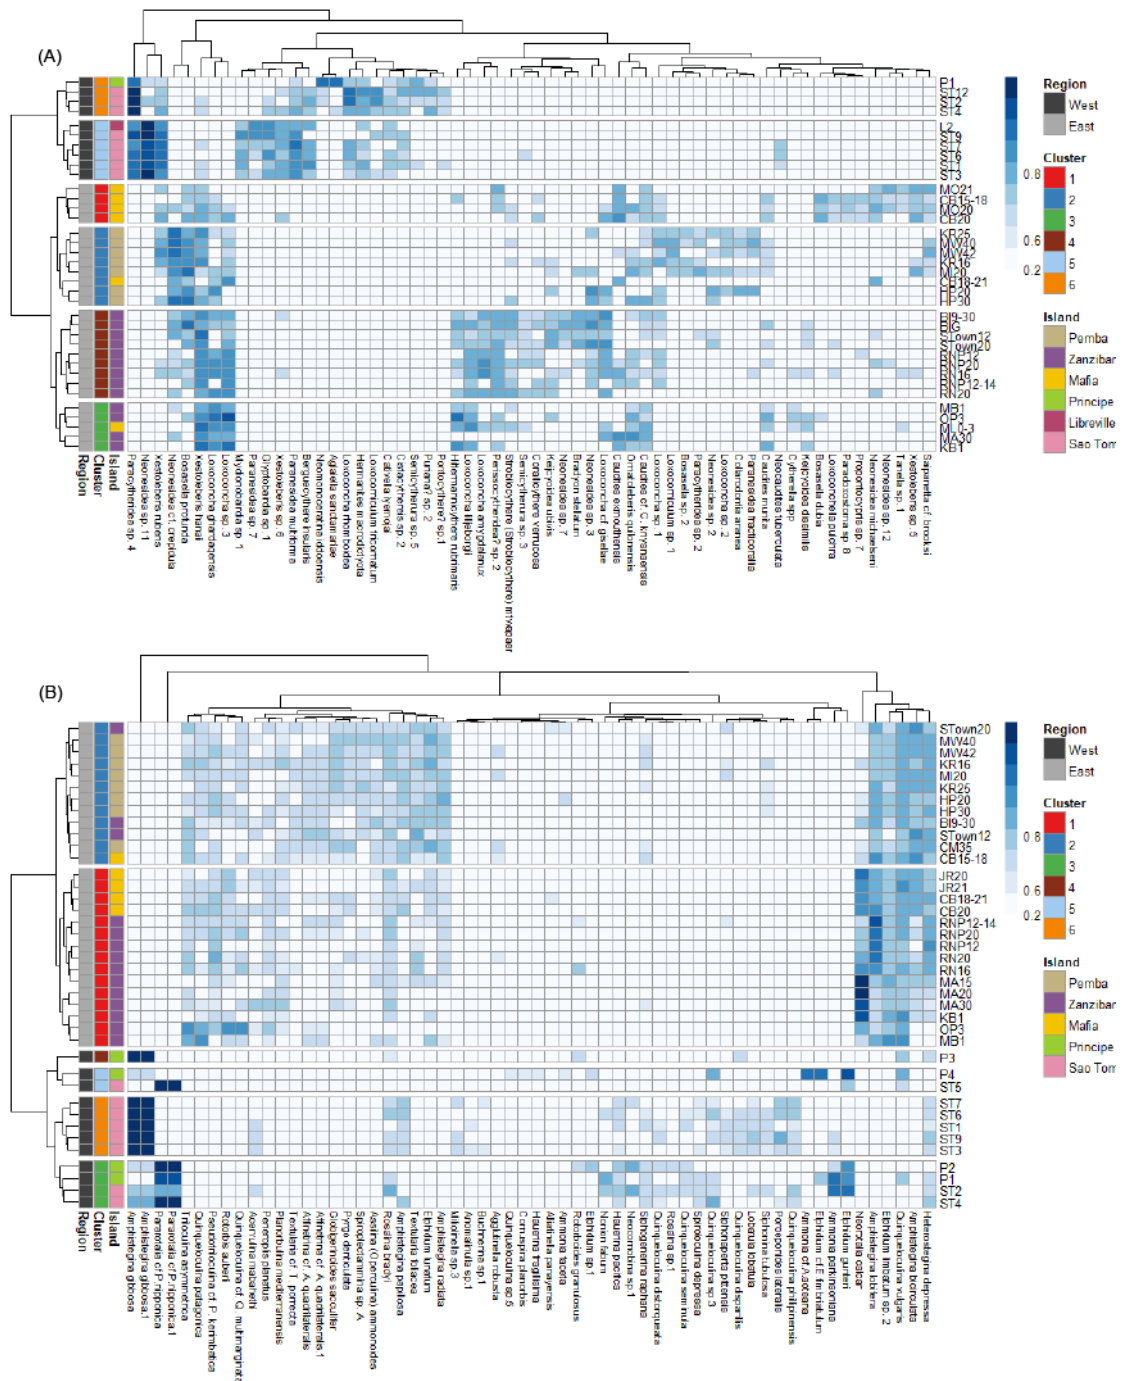

Fig. S3. Composition of ostracod (A) and foraminifera (B) assemblages in STP and Zanzibar in terms of the top 10 indicator species of each cluster at order  $q=0$ . The blue heatmaps illustrate species count in each sample after applying a fourth root transformation. Dendrograms based on Sørensen dissimilarity between samples and Hellinger distances between species. Color of each cluster as in Fig. 6.

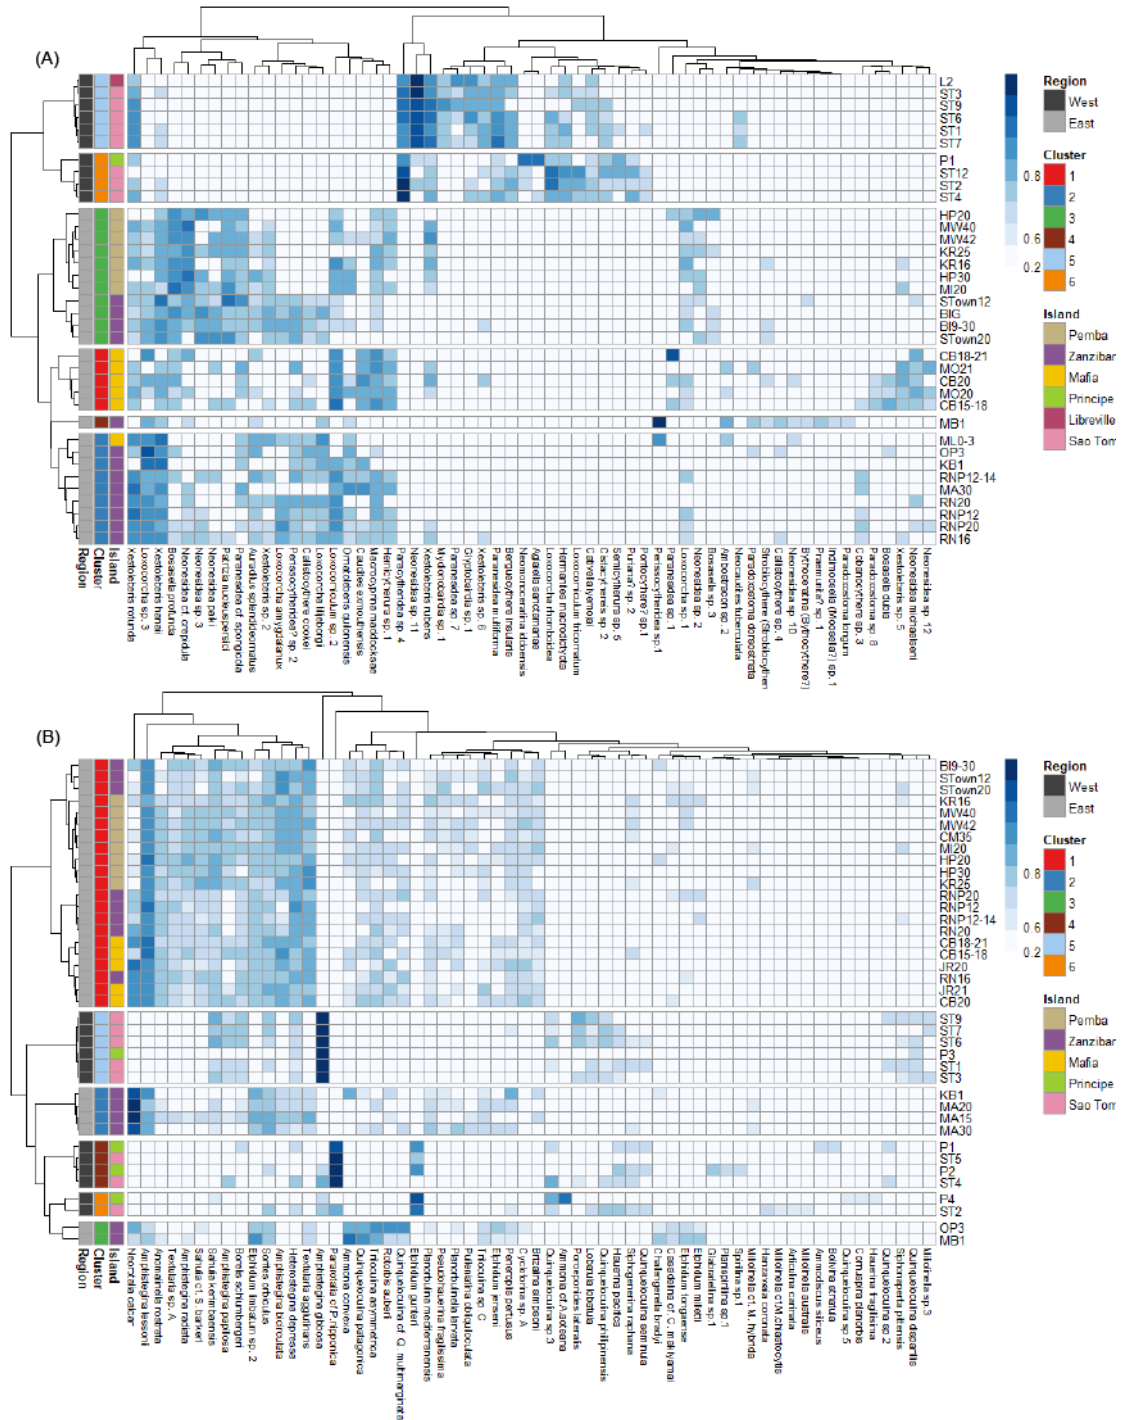

Fig. S4. Composition of ostracod (A) and foraminifera (B) assemblages in STP and Zanzibar in terms of top 10 indicator species of each cluster at order  $q=2$ . The blue heatmaps illustrate species count in each sample after applying a fourth root transformation. Dendrograms based on Morisita–Horn dissimilarity between samples and Hellinger distances between species. Color of each cluster as in Fig. 6.

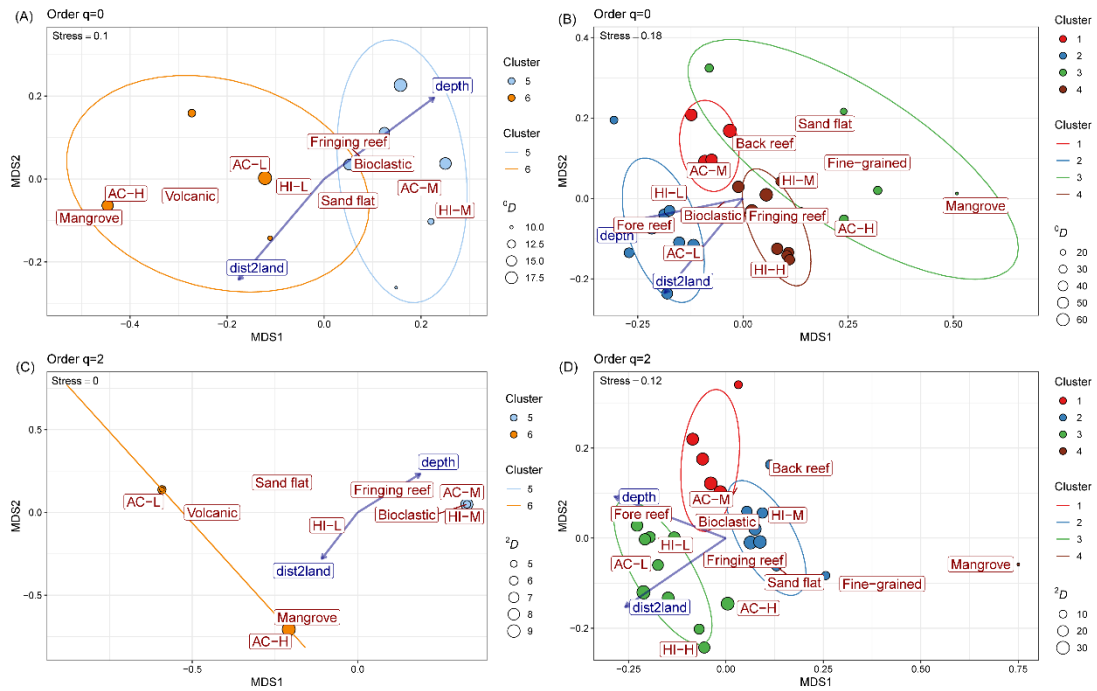

Fig. S5. nMDS ordination showing faunal variation correlated with environmental factors in STP and Zanzibar for ostracods at orders  $q=0$  and  $q=2$ . (A) STP  $q=0$ ; (B) Zanzibar  $q=0$ ; (C) STP  $q=2$ ; (D) Zanzibar  $q=2$ . The vectors indicate correlations with continuous environmental variables and labels indicate the centroids of categorical environmental variables. AC: algae coverage; HI: human impact; H: high; M: medium; L: low. Size of sample dots represents alpha diversity at the respective order. Color of each cluster as in Fig. 6.

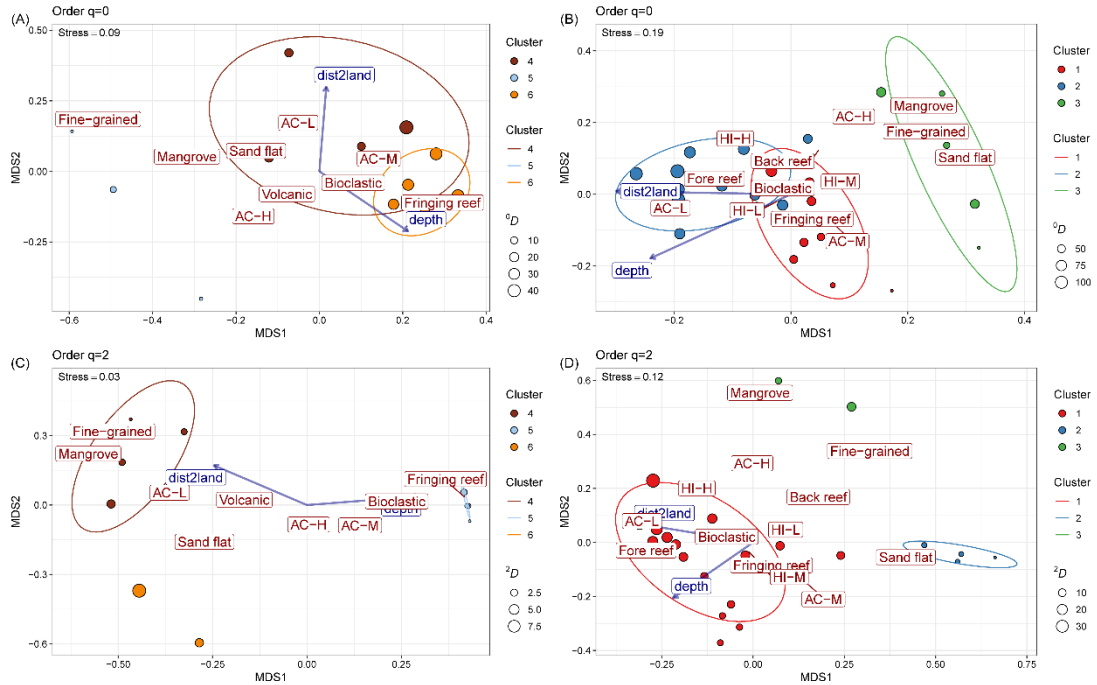

Fig. S6. nMDS ordination showing faunal variation correlated with environmental factors in STP and Zanzibar for foraminifera at orders  $q=0$  and  $q=2$ . (A) STP  $q=0$ ; (B) Zanzibar  $q=0$ ; (C) STP  $q=2$ ; (D) Zanzibar  $q=2$ . The vectors indicate correlations with continuous environmental variables and labels indicate the centroids of categorical environmental variables. AC: algae



coverage; HI: human impact; H: high; M: medium; L: low. Size of sample dots represents alpha diversity at the respective order. Color of each cluster as in Fig. 6.

## References

- Kamiya, T.: Morphological and ethological adaptations of Ostracoda to microhabitats in *Zostera* beds, *Dev. Palaeontol. Stratigr.*, 11, 303-318, [https://doi.org/10.1016/S0920-5446\(08\)70191-2](https://doi.org/10.1016/S0920-5446(08)70191-2), 1988.
- Keyser, D.: Ecology and zoogeography of recent brackish-water ostracoda (Crustacea) from south-west Florida, in: *Aspects of ecology and zoogeography of recent and fossil Ostracoda*, 207-222, 1977.
- Keyser, D. and Mohammed, M.: Taxonomy of recent shallow marine Ostracods from Al-Hudeida City-Yemen, *Mar. Micropaleontol.*, 164, 101974, <https://doi.org/10.1016/j.marmicro.2021.101974>, 2021.
- Maddocks, R. F.: Revision of Recent Bairdiidae (Ostracoda), in: *Bulletin of the United States National Museum*, 1969a.
- Maddocks, R. F.: Recent ostracodes of the Family Pontocyprididae chiefly from the Indian Ocean, *Smithson. Contrib. Zool.*, 7, Smithsonian Institution Press, 1-56 pp. 1969b.
- Maddocks, R. F.: Living and Fossil Macrocyprididae (Ostracoda), *The Paleontological Institute, The University of Kansas, Kansas* 1990.
- Maddocks, R. F.: New and poorly known species of Neonesidea (Bairdiidae, Ostracoda, Crustacea) from French Frigate Shoals, the Hawaiian Islands, *Zootaxa*, 3608, 457–510-457–510, <https://doi.org/10.11646/zootaxa.3608.6.3>, 2013.
- Munef, M. A., Al-Wosabi, M. A., Keyser, D., and Al-Kadasi, W. M.: Distribution and taxonomy of shallow marine Ostracods from northern Socotra Island (Indian Ocean)-Yemen, *Revue de micropaléontologie*, 55, 149-170, <https://doi.org/10.1016/j.revmic.2012.06.004>, 2012.
- Nogueira, A. A. E. and Ramos, M. I. F.: The genus *Perissocytheridea* Stephenson, 1938 (Crustacea: Ostracoda) and evidence of brackish water facies along the Oligo-Miocene, Pirabas Formation, eastern Amazonia, Brazil, *J. South Am. Earth Sci.*, 65, 101-121, <https://doi.org/10.1016/j.jsames.2015.11.007>, 2016.
- Omatsola, M. E.: Recent and subrecent Trachyleberididae and Hemicytheridae (Ostr., Crust) from the Western Niger Delta, Nigeria, *Bull. geol. Instn Univ. Upsala*, 3, 37-120, 1972.
- Purper, I. and de Orenellas, L. P.: The genus *Paracytheridea* (Ostracoda) in the northern/northwestern Brazilian continental shelf, *Pesquisas em Geociências*, 20, 103-124, <https://doi.org/10.22456/1807-9806.21675>, 1987.
- Sridhar, S., Hussain, S., Periakali, P., and Kumar, V.: Ostracod *Kotoracythere inconspicua* (Brady) from the Palk Bay, off Rameswaram, Southeast Coast of India: Its Zoogeography and Ecology, *Journal Geological Society of India*, 70, 981-986, 2007.
- Titterton, R. and Whatley, R.: Recent Bairdiinae (Crustacea, Ostracoda) from the Solomon Islands, *J. Micropalaeontol.*, 7, 111-142, <https://doi.org/10.1144/jm.7.2.111>, 1988.
- Whatley, R. C. and Watson, K.: A preliminary account of the distribution of Ostracoda in recent reef and reef associated environments in the Pulau Seribu or Thousand Island Group, Java Sea, *Dev. Palaeontol. Stratigr.*, 11, 399-411, [https://doi.org/10.1016/S0920-5446\(08\)70197-3](https://doi.org/10.1016/S0920-5446(08)70197-3), 1988.
- Wouters, K.: New records of the genus *Cyprideis* (Crustacea, Ostracoda) from south Africa, *Bulletin de l'Institut royal des sciences naturelles de Belgique, Biologie*, 73, 161-165, 2003.
- Wouters, K.: On the modern distribution of the euryhaline species *Cyprideis torosa* (Jones, 1850) (Crustacea, Ostracoda), *J. Micropalaeontol.*, 36, 21-30, <https://doi.org/10.6084/m9.figshare.c.3149791.v1>, 2017.
