# Supplementary material
Source: Copernicus journal article supplement (doi:10.5194/egusphere-2026-775)
Supplement: Supplementary file 2 [file Atlantic ostracod occurrence data.xlsx]

## Sheet: NWA
species
Actinocythereis bahamensis
Actinocythereis captionis
Actinocythereis dawsoni
Actinocythereis harbansi
Actinocythereis sp
Actinocythereis subquadrata
Actinocythereis vandenboldi
Acuticythereis laevissima
Aglaiocypris croneisi
Agrenocythere americana
Alicenula furcabdominis
Ambocythere caudata
Ambocythere sp
Anchistrocheles mcquadei
Argilloecia posterotruncata
Argilloecia sp.
Asterope elliptica
Asterope mariae
Aurila amygdala
Aurila auricula
Aurila chetumalensis
Aurila conradi
Aurila floridana
Aurila laevicula
Aurila macropunctata
Aurila wantlandi
Bairdia sp. 1
Bairdoppilata (Bairdoppilata) fasciata
Bairdoppilata (Glyptobairdia) coronata
Bairdoppilata (Glyptobairdia) trinodosa
Bairdoppilata cushmani
Bairdoppilata? Hirsuta
Basslerites minutus
Basslerites miocenicus
Basslerites parvissima
Basslerites sp
Basslerites twincayensis
Basslerites vokesi
Basslerites yoni
Bensonocythere americana
Bensonocythere arenicola
Bensonocythere hazeli
Bensonocythere sapeloensis
Bensonocythere sp.
Bensonocythere valentinei
Bensonocythere whitei
Bradleya dictyon
Buntonia tacheri
Bythoceratina monoceros
Bythocypris affinis
Bythocypris reniformis
Bythocythere sp.
Callistocythere cranekeyensis
Campylocythere laeva
Candona annae
Candona elliptica
Candona patzcuaro
Candona verretensis
Caribbella puseyi
Caribbella yoni
Cativella pulleyi
Caudites angulatus
Caudites highi
Caudites howei
Caudites nipeensis
Chelicopia arostrata
Conchoecia atlantica
Copytus baculoides
Coquimba congestocostata
Coquimba fissispinata
Costa bellipulex
Costa variabilocostata recticostata
Cushmanidea cristifera
Cushmanidea seminuda
Cyclasterope priacanthus
Cyclasterope sphaerica
Cyclasterope tripla
Cypretta bilicis
Cypretta brevisaepta
Cypria ophtalmica
Cypria pseudocrenulata
Cyprideis americana
Cyprideis beaveni
Cyprideis bensoni
Cyprideis gelica
Cyprideis margarita
Cyprideis mexicana
Cyprideis salebrosa
Cyprideis sp.
Cypridina flatus
Cypridina squamosa
Cypridopsis okeechobei
Cypridopsis vidua
Cyprinotus sp
Cypris pubera
Cythere lutea
Cytherella arostrata
Cytherella grossmani
Cytherella harpago
Cytherella pandora
Cytherella polita
Cytherella sp.
Cytherella vermilionensis
Cytherelloidea praecipua
Cytherelloidea sarsi
Cytherelloidea sp
Cytherelloidea sp. cf. C. leonensis
Cytherelloidea umbonata
Cytheretta litorea
Cytheretta louisianensis
Cytheridella alosa
Cytheridella alosvayi
Cytherois sp.
Cytheromorpha apheles
Cytheromorpha curta
Cytheromorpha fuscata
Cytheromorpha newportensis
Cytheromorpha paracastanea
Cytheropteron barkeri
Cytheropteron bjuduvali
Cytheropteron dominicanum
Cytheropteron guraboense
Cytheropteron harmatum
Cytheropteron howei
Cytheropteron morgani
Cytheropteron palton
Cytheropteron pyramidale
Cytheropteron sp.
Cytheropteron subreticulatum
Cytheropteron talquinensis
Cytheropteron tumulosimile
Cytheropteron yorktownensis
Cytherura aff. C. elongata
Cytherura aff. C. pseudostriata
Cytherura sp. aff. C. cornuta
Cytherura sp. ex. gr. C. johnsoni
Cytherura cybaea
Cytherura elongata
Cytherura erugata
Cytherura fiscina
Cytherura forulata
Cytherura howei
Cytherura johnsoni
Cytherura maya
Cytherura nucis
Cytherura pseudostriata
Cytherura radialirata
Cytherura reticulata
Cytherura sablensis
Cytherura sandbergi
Cytherura scissa
Cytherura sp.
Cytherura subwardensis
Cytherura swaini
Cytherura valentini
Cytherura wardensis
Dantya heardi
Dantya magnifica
Darwinula stevensoni
Dolerocypria fastigata
Dolerocypria inopinata
Echinocythereis margaritifera
Echinocythereis planibasalis procteri
Echinocythereis sp.
Echinocythereis spinireticulata
Eucythere declivis
Eucythere gibba
Eucythere sp. A
Eucythere triangulata
Eucytherura howei
Eucytherura sp. ex. gr. Complexa
Eucytherura sp
Eurypylus rousei
Eusarsiella carinata
Eusarsiella absens
Eusarsiella alata
Eusarsiella athrix
Eusarsiella bakeri
Eusarsiella capillaris
Eusarsiella childi
Eusarsiella cornuta
Eusarsiella costata
Eusarsiella cresseyi
Eusarsiella culteri
Eusarsiella dentifera
Eusarsiella dispar
Eusarsiella disparalis
Eusarsiella dominicana
Eusarsiella elofsoni
Eusarsiella gettlesoni
Eusarsiella gigacantha
Eusarsiella greyi
Eusarsiella nodimarginis
Eusarsiella ovalis
Eusarsiella ozotothrix
Eusarsiella paniculata
Eusarsiella pilipollicis
Eusarsiella punctata
Eusarsiella radiicosta
Eusarsiella sp
Eusarsiella spicata
Eusarsiella spinosa
Eusarsiella texana
Eusarsiella truncana
Eusarsiella tubipora
Eusarsiella uncus
Eusarsiella vema
Eusarsiella venezuelensis
Eusarsiella zostericola
Fabaeformiscandona balatonica
Fabaeformiscandona caudata
Fabaeformiscandona rawsoni
Finmarchinella finmarchica
Gangamocytheridea plicata
Gerdocypris croneisi
Glyptobairdia coronata
Haplocytheridea bradyi
Haplocytheridea kirkbii
Haplocytheridea placentiaensis
Haplocytheridea setipunctata
Havanardia havanensis
Havanardia sohni
Hemicyprideis nichuptensis
Hemicythere? auricula
Hemicytherura bradyi
Hemicytherura cranekeyensis
Henryhowella digitalis
Henryhowella ex. gp. asperrima
Hermanites hornibrooki
Hermanites transoceanica
Herpetocypris amychos
Heterocypris antilliensis
Heterocypris punctata
Hulingsina aff. H. glabra
Hulingsina aff. H. rugipustulosa
Hulingsina aff. H. semicircularis
Hulingsina americana
Hulingsina glabra
Hulingsina rugipustulosa
Hulingsina sp.
Ilyocypris gibba
Jonesia cf. J. acuminata
Jugosocythereis pannosa
Kangarina ancycla
Kangarina depressa
Keijcyoidea praecipua
Keijcyoidea sarsi
Keijia demissa
Kotoracythere inconspicua
Krithe producta
Krithe sp
Leptocythere angusta
Leptocythere nikraveshae
Limnocythere floridensis
Limnocythere friabilis
Limnocythere ornata
Limnocythere sanctipatricii
Limnocythere staplini
Loxoconcha avellana
Loxoconcha banesensis
Loxoconcha dorsotuberculata
Loxoconcha fischeri
Loxoconcha fischeri minima
Loxoconcha levis
Loxoconcha magna
Loxoconcha matagordensis
Loxoconcha minima
Loxoconcha moralesi
Loxoconcha ochlockoneensis
Loxoconcha oculocrista
Loxoconcha postdorsoalata
Loxoconcha reticularis
Loxoconcha sarasotana
Loxoconcha sp.
Loxoconcha sperata
Loxoconcha suboculocrista
Loxoconcha tricornata
Loxoconcha wilberti
Loxocorniculum dorsotuberculata
Loxocorniculum postdorsoalata
Loxocorniculum tricornatum
Luvula gigartonoides
Macrocyprina hawkae
Macrocyprina hortuli
Macrocyprina propinqua
Macrocyprina schmitti
Macrocyprina skinneri
Macrocyprina sp.
Macrocypris sp
Macrocypris africana
Macrocypris schmitti
Macropyxis improcera
Macropyxis simulans
Macrosarisa bensoni
Macrosarisa texana
Macroscapha gyreae
Malzella floridana
Malzella littorala
Megacythere johnsoni
Megacythere repexa
Megacythere robusta
Megacythere stephensoni
Microcythere howei
Microcythere sp. cf. M. inflexa
Microcytherura choctawhatcheensis
Microcytherura norfolkensis
Microcytherura sp.
Morkhovenia inconspicua
Muellerina canadensis
Muellerina lienenklausi
Muellerina ohmerti
Muellerina sp.
Mungava marthapuriae
Munseyella atlantica
Munseyella louisianensis
Munseyella sp. cf. M. minuta
Mutilus confragosus
Neocaudites atlantica
Neocaudites pulcher
Neocaudites scottae
Neocaudites triplistriatus
Neolophocythere subquadrata
Neomonoceratina mediterranea
Neonesidea dinochelata
Neonesidea gerda
Neonesídea longisetosa
Neonesidea sp.
Nesidea cushmani
Occultocythereis angusta
Orionina bradyi
Orionina ebanksi
Orionina serrulata
Orionina sp.
Orionina vaughani
Paracypris sp. 1
Paracytheridea altila
Paracytheridea cf.P. rugosa
Paracytheridea edwardsi
Paracytheridea hazeli
Paracytheridea rugosa
Paracytheridea sp.
Paracytheridea tschoppi
Paracytheridea washingtonensis
Paracytheroma stephensoni
Paracytheroma texana
Paradoxostoma delicata
Paradoxostoma pequegnati
Paradoxostoma sp.
Parakrithe alta
Parakrithella hanaii
Parakrithella reniformis
Paranesidea albatrossa
Paranesidea arostrata
Paranesidea bensoni
Paranesidea cancunensis
Paranesidea cf. P. bensoni
Paranesidea dimorpha
Paranesidea gigacantha
Paranesidea shulerae
Paranesidea sp.
Paranesidea victrix
Parapontoparta sp.
Parapontoparta subcaerulea
Parasarsiella globulus
Pellucistoma howei
Pellucistoma magniventra
Pellucistoma sp.
Peratocytheridea bradyi
Peratocytheridea setipunctata
Peratocytheridea sp.
Perissocytheridea bicelliforma
Perissocytheridea bisulcata
Perissocytheridea brachyforma
Perissocytheridea cribrosa
Perissocytheridea excavata
Perissocytheridea rugata
Perissocytheridea subrugosa
Perissocytheridea troglodyta
Phlyctocythere sp.
Physocypria globula
Physocypria pustulosa
Pontocypris intermedia
Pontocypris sp.
Pontocythere ashermani
Pontocythere sandersi
Pontocythere sclerochilus
Pontocythere semicularis
Pontocythere sp.
Pontocythere sulcata
Pontocythere tuberculata
Pontoparta hartmanni
Potamocypris mandingensis
Potamocypris smaragdina
Propontocypris aff. P. howei
Propontocypris edwardsi
Propontocypris multiporifera
Protcoconcha gigantica
Protcoconcha multipunctata
Protcoconcha nelsonensis
Protcoconcha tuberculata
Proteoconcha concinnoidea
Proteoconcha costa
Proteoconcha edwardsi
Proteoconcha gigantica
Proteoconcha nelsonensis
Proteoconcha proteus
Proteoconcha tuberculata
Protocytheretta ambifaria
Protocytheretta cf. P. sahnii
Protocytheretta danaiana
Protocytheretta litorea
Protocytheretta louisianensis
Protocytheretta montezuma
Protocytheretta pumicosa
Protocytheretta sahnii
Pseudoceratina droogeri
Pseudocytheretta edwardsi
Pseudopsammocythere ex. gp. vicksburgensis
Pseudopsammocythere peterseni
Pterygocythereis alophia
Pterygocythereis hondurasensis
Pterygocythereis inexpectata
Pterygocythereis sp.
Pumilocytheridea ayalai
Pumilocytheridea sandbergi
Pumilocytheridea sp.
Puriana carolinensis
Puriana convoluta
Puriana fissisptnata
Puriana floridana
Puriana matthewsi
Puriana rugipunctata
Puriana sp.
Quadracythere lankfordi
Quadracythere producta
Radimella floridana floridana
Radimella littorala
Radimella sp. ex. gr. confragosa
Radimella wantlandi
Reticulocythereis floridana
Reticulocythereis multicarinata
Reticulocythereis sp
Reussicythere reussi
Ruggieria dictyon
Sahnia foveolata
Sahnia sp
Sahnicythere sp.
Saipanetta kelloughae
Saipanetta mckenziei
Sclerochilus sp.
Tanella sp.
Tenedocythere transoceanica
Tetracytherura mccartanae
Thalassocypria gesinae
Thalassocypria vavrai
Thalassocythere acanthoderma
Trachyleberidea mammidentata
Triangulocypris laeva
Triebelina rugosa
Triebelina sertata
Xestoleberis antillea
Xestoleberis curassavica
Xestoleberis mixohalina
Xestoleberis punctata
Xestoleberis sp.
Xestoleberis sp. aff. X. aurantia
Xestoleberis sp. aff. X. margaritea
Xiphichilus sp. A
Zabythocypris helicina
Zabythocypris heterodoxa
Source
Late Pleistocene marginal marine ostracodes from the southeastern Atlantic coastal plain and their paleoenvironmental implications T. M. Cronin Géographie physique et Quaternaire 1979 Vol. 33 Issue 2 Pages 121-173
Zoogeography of Holocene cytheracean ostracodes in the bays of Texas E. C. Garbett and R. F. Maddocks Journal of Paleontology 1979 Pages 841-919
Ostracode biofacies in the Cape Hatteras, North Carolina, area J. Hazel Biology and paleobiology of Ostracoda. Bulletins of American Paleontology 1975 Vol. 65 Issue 282 Pages 463-488
Ostracodes of the mangroves of South Florida, their ecology and biology D. Keyser In: Biology and Paleobiology of Ostracoda, edited by F. M. SWAIN Paleontological Research Institution 1975 Vol. 65
Sarsiellidae of the western Atlantic and northern Gulf of Mexico and revision of the Sarsiellinae (Ostracoda: Myodocopina) L. S. Kornicker Publisher: Smithsonian Institution Press 1986 Vol. 415
Ecology and classification of Bahamian Cytherellidae (Ostracoda) L. S. Kornicker Micropaleontology 1963 Pages 61-70
Ecology, taxonomy and distribution of dominant ostracode taxa in modern carbonate sediments, northeastern Yucatán shelf, Mexico P. R. Krutak and R. G. Argáez Revista Mexicana de Ciencias Geológicas 1994 Vol. 11 Issue 2 Pages 7
Podocopan Ostracoda (Crustacea) of the Gulf of Mexino R. F. Maddocks, M. L. Machain-Castillo and F. R. Gio-Argaez In: Gulf of Mexico origin, waters, and biota: Biodiversity, edited by D. L. Felder and D. K. Camp Texas A&M University Press 2009
Studies Related to the Charleston, South Carolina, Earthquake of 1886: Neogene and Quaternary Lithostratigraphy and Biostratigraphy L. McCartan Publisher: U.S. Geological Survey 1990
Distribution of Holocene marine ostracoda from Belize J. W. Teeter and K. Wantland Belize Shelf—Carbonate Sediments, Clastic Sediments, and Ecology. American Association of Petroleum Geologists, Studies in Geology 1975 Issue 2 Pages 400-499
Marine Ostracoda from Tortugas, Florida W. L. Tressler Journal of the Washington Academy of Sciences 1949 Vol. 39 Issue 10 Pages 335-343

## Sheet: SWA
species
Actinocythereis brasiliensis
Ambocythere sp.
Anchistrocheles? sp.
Apatihowella inflata
Apatihowella macrocicatricosa
Argenticytheretta laevipunctata
Argenticytheretta? sp.
Argilloecia inflata
Argilloecia parameridionalis
Argilloecia sp.
Auradilus convolutus
Auradilus costatus
Auradilus sp.
Auricythere sublitoralis
Aurila ornellasae
Australimoosella polypleuron
Australoecia neritica
Australoecia sp.
Aversovalva sp.
Aversovalva wurdigae
Bairdiidae sp
Bairdoppilata (G.) coronata
Bairdoppilata sp.
Bairdoppilata sudbrasiliensis
Basslerites multicostata
Berguecythere insularis
Bradleya kaesleri
Bradleya pseudonormani
Bradleya sp.
Brasilicythere reticulispinosa
Brasilicythere sp. aff. B. reticulispinosa
Bulbocythere calida
Bythoceratina sp
Callistocythere cranekeyensts
Callistocythere fossulata
Callistocythere laminata
Callistocythere multicellulosa
Callistocythere nucleoperiscum
Callistocythere ornata
Callistocythere sigmocostelata
Cativella paratranslucens
Cativella reticulocostata
Cativella sp.
Cativella sudbrasiliensis
Caudites aff. gnomus
Caudites exmounthesis
Caudites fluminensis
Caudites gnomus
Caudites nipeensis
Caudites obliquecostatus
Caudites ohmerti
Caudites seminudus
Caudites vandenboldi
Caudtes sp.
Cletocythereis atlantica
Cletocythereis sp.
Copytus sp.
Copytus wuerdigae
Coquimba alata
Coquimba bertelsae
Coquimba ornellasae
Coquimba punctata
Coquimba tenuireticulata
Cornucoquimba decorata
Cornucoquimba lutziana
Cornucoquimba nana
Cornucoquimba ramosae
Cornucoquimba reticulata
Cornucoquimba sp.
Costa v. aff. recticostata
Costa variabilicosta aff. C. v. recticostata
Costa variabilicostata
Cushmanidea echevarriae
Cyprideis multidentata
Cyprideis salebrosa
Cytherella eros
Cytherella hermargentina
Cytherella sp.
Cytheretta cf. C. punctata
Cytheretta punctata
Cytheretta sp.
Cytheropteron sp.
Cytherura sp.
Eucythere sp.
Eucytherura sp.
Gangamocytheridea dictyon
Glyptobairdia coronata
Hemicytherura auriculata
Hemicytherura brady
Henryhowella sp.
Henryhowella tuberculoclaviforma
Hermanites transoceanicus
Hulingsina sp.
Hulingsina toreuma
Kangarina abyssicola
Kangarina ancyla
Kangarina sp.
Keijcyoidea amazonica
Keijcyoidea sp.
Keijia demissa
Kotoracythere inconspicua
Krithe gnoma
Legitimocythere megapotamica
Loxoconcha (L.) tricornata
Loxoconcha bullata
Loxoconcha forda
Loxoconcha itapevensis
Loxoconcha sp.
Loxocorniculum sp.
Loxocorniculum tricornatum
Macrocyprina sp.
Meridionalicythere? sp. 1
Microcythere sp.
Muellerina cribosa
Muellerina sp.
Munseyella sp.
Nanocoquimba labyrinthica
Nanocoquimba pulchra
Nealocythere cf. antarctica
Nealocythere sp.
Neocaudites planeforma
Neocaudites subimpressus
Neocaudites triplistriatus
Neohornibrookella ex gr. Transoceanica
Neomonoceratina mediterranea mediterranea
Neonesidea equatorialis
Neonesidea longisetosa
Neonesidea sp.
Oculocytheropteron circumcostatum
Oculocytheropteron delicatum
Oculocytheropteron macropunctatum
Oculocytheropteron pintoi
Oculocytheropteron reticulopunctatum
Oculocytheropteron sp.
Orionina brady
Orionina similis
Papillosacythere parallela
Paracypris sp.
Paracytheridea batei
Paracytheridea bulbosa
Paracytheridea inflata
Paracytheridea paralelicostata
Paracytheridea reticulata
Paracytheridea sp.
Paracytheridea spinosa
Paracytheridea tschoppi
Paradoxostoma sp.
Paranesidea bensoni
Paranesidea parabipustulosa
Paranesidea sp.
Pellucistoma elongata
Pellucistoma ex gr. Magniventra
Pellucistoma sp.
Perissocytheridea krommelbeini
Perissocytheridea sanantoniensis
Phlyctocythere sp.
Pontocypris punctatus
Propontocypris sp.
Protocytheretta cf. P. multicostata
Protocytheretta sp.
Pseudoceratina droogeri
Pseudocythere sp.
Puriana convoluta
Puriana variabilis
Quadracythere eichlerae
Quadracythere sp.
Quadracythere venusta
Radimella confragosa
Radimella ovata
Ruggiericythere batistae
Ruggiericythere dimorphica
Ruggiericythere perspicua
Ruggiericythere purperae
Ruggiericythere sp.
Ruggiericythere vixalata
Sclerochilus sp.
Semicytherura aff. S. rugosoreticulata
Semicytherura caudata
Semicytherura closteria
Semicytherura parallelocostata
Semicytherura rugosoreticulata
Semicytherura sp.
Semixestoleberis sp.
Tenedocythere ex gr. Transoceanica
Tenedocythere trindadensis
Triebelina aff. T. sertata
Triebelina sertata
Triebelina sp.
Vandenboldina aff. V. droogeri
Whatleyella sanguinettiae
Xestoleberis inesae
Xestoleberis sp.
Xestoleberis umbonata
Yemanja aff. Y. youngi
Yemanja sp.
Source
Ruggiericythere, a new shallow marine ostracod genus from Brazil G. Aiello, J. Coimbra and D. Barra Bollettino della Società Paleontologica Italiana 2004 Vol. 43 Issue 1-2 Pages 71-90
Fossil Holocene ostracoda from the Itapeva lake, southern brazilian coastal plain L. T. S. Campos, L. D. O. Nunes and C. T. Bergue Revista Brasileira de Paleontologia 2021 Vol. 24 Issue 2 Pages 79-89
Zoogeography of Holocene Podocopina (Ostracoda) from the Brazilian equatorial shelf J. C. Coimbra, I. D. Pinto, N. L. Wurdig and D. A. do Carmo Marine Micropaleontology 1999 Vol. 37 Issue 3-4 Pages 365-379
Taxonomy and ecology of Cornucoquimba ramosae sp. nov.(Ostracoda, Crustacea) on the Brazilian Equatorial shelf J. Coimbra and D. Do Carmo Journal of Micropalaeontology 2002 Vol. 21 Issue 1 Pages 23-27
The taxonomy and zoogeography of the family Trachyleberididae (Crustacea: Ostracoda) from the Equatorial Continental Shelf of Brazil J. C. Coimbra, M. I. F. Ramos, R. C. Whatley and C. T. Bergue Journal of Micropalaeontology 2004 Vol. 23 Issue 2 Pages 107-118
Richness and palaeo-zoogeographical significance of the benthic Ostracoda (Crustacea) from the oceanic Island of Trindade and Rocas Atoll, Brazil J. C. Coimbra and A. L. Carreño Revista brasileira de paleontologia 2012 Vol. 15 Issue 2 Pages 189-202
Ostracoda (Crustacea) from the Archipelago of São Pedro and São Paulo, Equatorial Atlantic, with emphasis on a new Hemicytheridae genus J. C. Coimbra, S. R. Bottezini and C. P. Machado Iheringia. Série Zoologia 2013 Vol. 103 Pages 289-301
Provinciality of Ostracoda (Crustacea) in the northeastern and eastern Brazilian shelves based on neontological and paleontological analyses C. P. Machado, J. C. Coimbra and C. T. Bergue Revista Brasileira de Paleontologia 2020 Vol. 23 Issue 1 Pages 3-31
Ostracoda (Crustacea) from the infralittoral of Santa Catarina State, southern Brazil. A. Morais and J. Coimbra Marine Biodiversity 2019 Vol. 49 Pages 69–82
The ostracod genus Coquimba Ohmert, 1968, from the Brazilian continental shelf M. I. F. Ramos Revista Española de Micropaleontología 1994 Vol. 26 Issue 3 Pages 65-82
Taxonomy and ecology of the family Cytheruridae (Ostracoda) in Recent sediments from the northern Rio de Janeiro coast, Brazil M. I. F. Ramos, J. C. Coimbra, R. C. Whatley and A. Moguilevsky Journal of Micropalaeontolgy 1999 Vol. 18 Issue 1 Pages 1-16

## Sheet: NEA
species
Acanthocythereis ascolii
Acanthocythereis hystrix
Aglaiocypris complanata
Aglaiocypris rara
Argilloecia aff. conoidea
Argilloecia minor
Aurila? cicatricosa
Aurila arborescens
Aurila cf. A. interpretis
Aurila convexa
Aurila glyptica
Aurila latisolea
Aurila prasina
Aurila punctata
Aurila puncticruciata
Aurila speyeri
Aurila spp.
Aurila woodwardii
Aurila woutersi
Bairdia sp.
Bairdia subcircinata
Bairdopillata sp.
Basslerites berchoni
Basslerites cf. berchoni
Basslerites teres
Bosquetina carinella
Bosquetina dentata
Bosquetina tarentina
Bradystoma bradyi
Brunneostoma aff. cuneatum
Buntonia sublatissima
Buntonia subulata
Buntonia textilis
Bythocythere bradyi
Bythocythere intermedia
Bythocythere minima
Bythocythere sp.
Bythocythere zetlandica
Callistocythere adriatica
Callistocythere aff. C. protracta
Callistocythere aff. C. rastrifera
Callistocythere aff. gilva
Callistocythere badia
Callistocythere cf. adriatica
Callistocythere cf. C. pallida
Callistocythere crispata
Callistocythere curryi
Callistocythere diffusa
Callistocythere donovani
Callistocythere flavidofusca
Callistocythere folliculosa
Callistocythere insularis
Callistocythere intricatoides
Callistocythere javidofusca
Callistocythere littoralis
Callistocythere lobiancoi
Callistocythere murrayi
Callistocythere rasrrifera
Callistocythere sp.
Carinocythereis antiquata
Carinocythereis antiquata bairdi
Carinocythereis carinata
Carinocythereis rhombica
Carinocythereis white
Caudites calceolarus
Celtia emaciata
Celtia quadridentata
Cistacythereis turbida
Cluthia keiji
Costa batei
Costa cf. edwardsi
Costa edwardsi
Costa punctatissima
Costa reymenti
Costa runcinata
Costa sp.
Cuneocythere semipunctata
Cushmanidea elongata
Cushmanidea turbida
Cylindroleberis sp.
Cyprideis torosa
Cypridopsis vidua
Cypris bispinosa
Cytherella (Cytherelloidea) beckmanni
Cytherella alvearium
Cytherella cf. vulgata
Cytherella robusta
Cytherella scutulum
Cytherella sp.
Cytherella thrakiensis
Cytherella vulgatella
Cytherelloidea cf. sordida
Cytherelloidea sordida
Cytheretta adriatica
Cytheretta judaea
Cytheretta sp.
Cytheretta subradiosa
Cytheridea neapolitana
Cytherois aff. C. fischeri
Cytherois aff. C. frequens
Cytherois aff. C. incongruens
Cytherois aff. C. niger
Cytherois aff. C. pontica
Cytherois aff. C. triangularis
Cytherois aff. C. uffenordei
Cytherois cf. stephanidesi
Cytherois fischeri
Cytherois frequens
Cytherois incongruens
Cytherois joachinoi
Cytherois pontica
Cytherois sp.
Cytherois succinea
Cytherois triangularis
Cytherois uffenordei
Cytheroma cf. C. karadagiensis
Cytheroma variabilis
Cytheropreron nodosum
Cytheropteron aff. punctatum
Cytheropteron cf. C. latum
Cytheropteron cf. ruggierii
Cytheropteron depressum
Cytheropteron dorsocostatum
Cytheropteron latum
Cytheropteron monoceros
Cytheropteron punctatum
Cytheropteron rotundatum
Cytheropteron sp.
Cytheropteron sulcatum
Cytheropteron testudo
Cytheropteron vespertilio
Cytheropteron volantium
Cytheropteron zinzulusae
Cytheropteron ionicum
Echinocythereis laticarina
Echinocythereis sp.
Ekpontocypris pirifera
Elofsonia minima
Elofsonia pusilla
Eucythere anglica
Eucythere argus
Eucythere curta
Eucythere declivis
Eucythere prava
Eucythere sp.
Eucytherura complexa
Eucytherura gibbera
Eucytherura mistrettai
Eucytherura sp.
Falsocythere terryi
Falunia cf. sphaerulolineata
Falunia costata
Finmarchinella angulata
Hemicythere rubida
Hemicythere villosa
Hemicytherura aff. defiorei
Hemicytherura cellulosa
Hemicytherura cf. H. cellullosa
Hemicytherura defiorei
Hemicytherura gracilicosta
Hemicytherura hoskini
Hemicytherura videns
Hemicytherura videns gracilicosta
Hemicytherura videns videns
Henryhowella ex gr. H. hirta
Henryhowella sarsii
Henryhowella sp.
Herpetocypris chevreuxi
Heterocypris salina
Heterocypris sp.
Heterocythereis albomaculata
Heterocythereis voraginosa
Hiltermannicythere emaciata
Hiltermannicythere retifastigata
Hiltermannicythere rubra
Hiltermannicythere sp.
Hiltermannicythere sphaerulolineata
Hiltermannicythere turbida
Hirschmannia tamarindus
Hirschmannia viridis
Ilyocypris gibba
Incongruellina marginara
Jugosocythereis prava
Kangarina abyssicola
Krithe aff. praetexta
Krithe praetexta
Lanceostoma aff. tenerifense
Lanceostoma simplex
Lanceostoma sp.
Leptocythere aff. L. rara
Leptocythere bacescoi
Leptocythere baltica
Leptocythere castanea
Leptocythere cf. L. lagunae
Leptocythere cf. L. macella
Leptocythere ciliata
Leptocythere cribrosa
Leptocythere fabaeformis
Leptocythere lacertosa
Leptocythere lagunae
Leptocythere levis
Leptocythere macallana
Leptocythere macella
Leptocythere muellerfabaeformis
Leptocythere pellucida
Leptocythere porcellanea
Leptocythere psammophila
Leptocythere ramosa
Leptocythere sp.
Leptocythere tenera
Limnocythere inopinata
Loculicytheretta pavonia
Loxocauda decipiens
Loxocauda pellucida
Loxoconcha? conjugalis
Loxoconcha aff. L. gibberosa
Loxoconcha aff. L. rhomboidea
Loxoconcha affinis
Loxoconcha bairdi
Loxoconcha concentrica
Loxoconcha elliptica
Loxoconcha exagona
Loxoconcha gibberosa
Loxoconcha malcomsoni
Loxoconcha minima
Loxoconcha napoliana
Loxoconcha ovulata
Loxoconcha parallela
Loxoconcha pontica
Loxoconcha rhomboidea
Loxoconcha rubritincta
Loxoconcha sp.
Loxoconcha stellifera
Loxoconcha tumida
Macrocyprina succinea
Macropyxis adriatica
Microceratina amfibola
Microceratina pseudoamphibola
Microceratina sp.
Microcythere aff. M. obliqua
Microcythere cf. M. inflexa
Microcythere depressa
Microcythere hians
Microcythere inflexa
Microcythere obliqua
Microcythere rara
Microcythere vitrea
Microcytherura angulosa
Microcytherura cf. nigrescens
Microcytherura fulva
Microcytherura nigrescens
Microcytherura sp.
Microxestoleberis cf. pustulosa
Microxestoleberis depressa
Microxestoleberis nana
Microxestoleberis sp.
Monoceratina oblita
Mutilus sp.
Nannocythere nana
Nannocythere pavo
Neocythere complicata
Neocytherideis cf. bradyi
Neocytherideis fasciata
Neocytherideis foveolata
Neocytherideis mulleri
Neocytherideis sp.
Neocytherideis subulata
Neonesidea aff. N. formosa
Neonesidea cf. corpulenta
Neonesidea corpulenta
Neonesidea formosa
Neonesidea longevaginata
Neonesidea longisetosa
Neonesidea mediterranea
Neonesidea schulzi
Neonesidea sp
Nonurocythereis seminulum
Occultocythereis dohrni
Occultocythereis sp
Orionina sp. 1
Palmoconcha guttata
Palmoconcha laevata
Palmoconcha subrugosa
Palmoconcha turbida
Paracypris polita
Paracytheridea aff. P. parallia
Paracytheridea cf. depressa
Paracytheridea cf. P. bovettensis
Paracytheridea depressa
Paracytheridea paulii
Paracytheridea sp.
Paracytheridea triquetra
Paracytherois? sp.
Paracytherois acuminata
Paracytherois aff. P. flexuosa
Paracytherois agigensis
Paracytherois cf. mediterranea
Paracytherois flexuosa
Paradoxostoma acuminatum
Paradoxostoma aff. abbreviatum
Paradoxostoma aff. P. angustum
Paradoxostoma aff. P. ponticum
Paradoxostoma aff. P. rarum
Paradoxostoma cf. atrum
Paradoxostoma aff. P. rotundatum
Paradoxostoma aff. P. triste
Paradoxostoma cf. P. variabile
Paradoxostoma cf. versicolor
Paradoxostoma angustum
Paradoxostoma atrum
Paradoxostoma breve
Paradoxostoma caecum
Paradoxostoma ensiforme
Paradoxostoma incongruens
Paradoxostoma intermedium
Paradoxostoma parallelum
Paradoxostoma robinhoodi
Paradoxostoma sarniense
Paradoxostoma simile
Paradoxostoma sp.
Paradoxostoma striatum
Paradoxostoma tenuissimum
Paradoxostoma trieri
Paradoxostoma triste
Parakrithe dimorpha
Paranesidea sp
Paranesidea aff. P. reticulata
Phlyctocythere pellucida
Phylctocythere sp.
Polycope dispar
Polycope reticulata
Pontocypria spinosa
Pontocypris acuminata
Pontocypris aff. P. pellucida
Pontocypris cf. acuminata
Pontocypris cf. mytiloides
Pontocypris cf. rara
Pontocypris frequens
Pontocypris mytiloides
Pontocypris obtusa
Pontocypris pellucida
Pontocypris sp.
Pontocythere elongata
Pontocythere turbida
Potamocypris sp.
Procytherideis aff. subspiralis
Procytherideis cf. complicata
Procytherideis cf. foveolata
Procytherideis complicata
Procytherideis retifera
Procytherideis subspiralis
Propontocypris cf. intermedia
Propontocypris cf. trigonella
Propontocypris intermedia
Propontocypris monstrosa
Propontocypris pirifera
Propontocypris rara
Propontocypris setosa
Propontocypris solida
Propontocypris sp.
Propontocypris subfusca
Propontocypris succinea
Pseudocandona parallela
Pseudocandona sp.
Pseudocythere caudata
Pseudocytherura calcarata
Pseudocytherura strangulata
Pseudopsammocythere reniformis
Pseudopsammocythere similis
Pterygocythere sp.
Pterygocythereis ceratoptera
Pterygocythereis jonesii
Pterygocythereis siveteri
Qinghaicypris riojensis
Rectobuntonia miranda
Rectobuntonia rectangularis
Rectotrachyleberis punctatissima
Roundstonia robertsoni
Ruggieria tetraptera
Sagmatocythere? sp.
Sagmatocythere aff. scrupea
Sagmatocythere caelata
Sagmatocythere littoralis
Sagmatocythere multifora
Sagmatocythere napoliana
Sagmatocythere variesculpta
Sagmatocythere versicolor
Sahnia fasciata
Sahnicythere retroflexa
Sclerochilus? Aequus
Sclerochilus cf. abbreviatus
Sclerochilus contortus
Sclerochilus gewemuelleri
Sclerochilus hicksi
Sclerochilus levis
Semicytherura abdita
Semicytherura acuminata
Semicytherura acuta
Semicytherura acuticostata
Semicytherura acuticostata cf. ventricosa
Semicytherura acuticostata ventricosa
Semicytherura aff. alifera
Semicytherura aff. angulata
Semicytherura cf. S. amorpha
Semicytherura aff. S. acuminata
Semicytherura aff. S. acuta
Semicytherura cf. acuticostata
Semicytherura aff. Cornuta
Semicytherura aff. S. inversa
Semicytherura aff. S. neglecta
Semicytherura aff. S. omorfa
Semicytherura aff. S. rara
Semicytherura aff. S. reticulata
Semicytherura aff. S. slavonica
Semicytherura aff. Sella
Semicytherura cf. producta
Semicytherura cf. quadratovolatilis
Semicytherura cf. stilifera
Semicytherura cf. sulcata
Semicytherura alifera
Semicytherura angulata
Semicytherura arcachonensis
Semicytherura biciemmei
Semicytherura brandaoae
Semicytherura cornuta
Semicytherura costata
Semicytherura diafora
Semicytherura dispar
Semicytherura incongruens
Semicytherura inversa
Semicytherura mediterranea
Semicytherura occulta
Semicytherura paradoxa
Semicytherura punctata
Semicytherura quadridentata
Semicytherura rara
Semicytherura rarecostata
Semicytherura reticulata
Semicytherura robertsi
Semicytherura robusta
Semicytherura ruggierii
Semicytherura sella
Semicytherura simplex
Semicytherura sp.
Semicytherura stilifera
Semicytherura striata
Semicytherura sulcata
Semicytherura tela
Semicytherura tergestina
Semicytherura trachina
Semicytherura undata
Semicytherura ventricosa
Slerochilus sp.
Tenedocythere prava
Terrestricythere aff. elisabethae
Tetracytherura angulosa
Thaerocythere hoptonensis
Thaerocythere lusitanica
Triebelina cf. raripila
Triebelina raripila
Triebelina sp.
Tuberculocythere infelix
Tuberoloxococncha tuberosa
Tuberoloxoconcha cf. atlantica
Tuberoloxoconcha sp.
Typhlocythere ruggierii
Urocythereis britannica
Urocythereis crenulosa
Urocythereis distinguenda
Urocythereis favosa
Urocythereis ilariae
Urocythereis labyrinthica
Urocythereis margaritifera
Urocythereis oblonga
Urocythereis schulzi
Urocythereis sp.
Verrucocythereis bulbuspinata
Xestoleberis aff. parva
Xestoleberis aff. X. labiata
Xestoleberis aff. X. pellucida
Xestoleberis cf. depressa
Xestoleberis cf. nitida
Xestoleberis cf. X. dispar
Xestoleberis cf. X. perminima
Xestoleberis ct. X. cypria
Xestoleberis communis
Xestoleberis aurantia
Xestoleberis cypria
Xestoleberis decipiens
Xestoleberis depressa
Xestoleberis dispar
Xestoleberis labiata
Xestoleberis margaritopsis
Xestoleberis pellucida
Xestoleberis plana
Xestoleberis rubens
Xestoleberis sp
Source
Infralittoral ostracoda and benthic foraminifera of the Gulf of Pozzuoli (Tyrrhenian Sea, Italy) G. Aiello, D. Barra, R. Parisi, M. Arienzo, C. Donadio, L. Ferrara, et al. Aquatic Ecology 2021 Vol. 55 Issue 3 Pages 955-998
Recent infralittoral foraminiferida and ostracoda from the porto Cesareo Lagoon (Ionian Sea, Mediterranean) G. Aiello, D. Barra, M. G. Coppa, A. Valente and F. Zeni Bollettino-Societa Paleontologica Italiana 2006 Vol. 45 Issue 1 Pages 1-14
Ostracods (Crustacea, Ostracoda) from Doñana (SW Spain): an updated checklist, including new records, of Recent and Quaternary non-marine, ma-rine and brackish species in the area Á. Baltanás, M. Á. Bravo-Utrera, M. L. González-Regalado, S. Tasso and F. Ruiz Limnetica 2025 Vol. 44 Issue 2 Pages 269-295
Coastal evolution and Holocene ostracods in Melides lagoon (SW Portugal) M. Cabral, M. d. C. Freitas, C. Andrade and A. Cruces Marine Micropaleontology 2006 Vol. 60 Issue 3 Pages 181-204
Overview of Recent and Holocene ostracods (Crustacea) from brackish and marine environments of Portugal M. C. Cabral and I. M. Loureiro Journal of Micropalaeontology 2016 Vol. 32 Pages 135-159
The 80 most common Ostracods from the Bay of Fetovaia Elba Island (Mediterranean Sea) C. Joachim and M. Langer Steinmann Institut für Geologie Universität Bonn 2008
The shallow marine ostracod communities of the Azores (Mid-North Atlantic): taphonomy and palaeoecology R. P. Meireles, D. Keyser, P. Borges, L. Silva, A. D. F. Martins and S. Ávila Geologica Acta 2014 Vol. 12 Issue 1 Pages 53-70
The Holocene to Recent ostracods of the Azores archipelago (NE Atlantic): Systematics and biogeography R. P. Meireles, D. Keyser and S. P. Ávila Marine Micropaleontology 2014 Vol. 112 Pages 13-26
Distribution and ecology of recent ostracods from the Tahadart estuary (NW Morocco) D. Nachite and J. Rodriguez-Lazaro Revue de micropaléontologie 2010 Vol. 53 Pages 3-15
Ostracods of the Mediterranean (The Gulf of Antalya) and the Aegean Sea (Ayvalik and Kuşadasi) and their biogeographical distributions D. Parlak and A. Nazik Bulletin of the Mineral Research and Exploration 2016 Vol. 152 Issue 152 Pages 63-83
Multivariate analysis applied to total and living fauna: seasonal ecology of recent benthic Ostracoda off the North Cádiz Gulf coast (southwestern Spain) F. Ruiz, M. González-Regalado and J. Muñoz Marine Micropaleontology 1997 Vol. 31 Issue 3-4 Pages 183-203
Ostracods from mid-outer shelf bottoms of the Ciclopi Islands marine protected area (Ionian Sea, eastern Sicily) F. Sciuto, A. Rosso, R. Sanfilippo and E. Di Martino Bollettino della Società Paleontologica Italiana 2015 Vol. 54 Issue 2 Pages 91-99
Dynamics in Recent marine benthic ostracode assemblages in the Limski Kanal (Northern Adriatic Sea) H. Uffenorde In: Biology and Paleobiology of Ostracoda, edited by F. M. SWAIN Paleontological Research Institution 1975 Vol. 65

## Sheet: TEA
species
“Aglaia" rara
Aglaiella sanctamariae
Aglaiella sp
Aglaiocypris gambiensis
Asteropteron aff. A. nodulosum
Auradilus curvistriatus
Aurila dayii
Aurila punctoreticulata
Aurila voraginosa
Bairdia sp.
Bairdoppilata sp
Basslerites (Loculiconcha) ikoroduensis
Basslerites (Loculiconcha) punctata
Basslerites elongatus
Buntonia foliata
Buntonia olokundudui
Callistocythere littoralis
Campylocythereis leguminopsis
Campylocythereis nuxa
Campylocythereis sandbergi
Campylocythereis sp.
Carinocythereis asterospinosus
Carinocythereis sp.
Cativella iyemojai
Caudites africanus
Chrysocythere boldi
Chrysocythere foveostriata
Chrysocythere foveostriata minuta
Cletocythereis sp. aff. C. bradyi
Cobanocythere sp
Copytus fusiformis
Costa sp
Cylindroleberis sp
Cyprideis nigeriensis
Cyprideis remanei
Cyprideis sp
Cyprideis torosa
Cytherella cuneolus
Cytherella eburnea
Cytherella hanaii
Cytherella joalensis
Cytherella olosa
Cytherella ponderosa
Cytherella sp
Cytherelloidea lobitoensis
Cytherelloidea sp
Cytherois sp
Cytheromorpha sp.
Cytheropteron ebutemettaensis
Cytheropteron sp.
Cytherura sp
Dakrika robusta
Eucytheridea sp
Falsocythere cf. terryi
Falsocythere simplex
Falsocythere terryi
GambielIa caelata
Gibboborchella kuznetsovae
Grinioneis sp. aff. Hermanites foveolatus
Hemicytherura cellulosa
Hemicytherura sp.
Hermanites batei
Hermanites cf. foveolata
Hermanites foveolata
Hermanites macrodictyota
Hermanites sp.
Kangarina abyssicola
Keijella sp. Aff. Ruggieria indoiranica
Keijia demissa
Kotoracythere inconspicua
Leptocythere culpata
Loculicytheretta morkhoveni
Loxoconcha dimorpha
Loxoconcha lacunensis
Loxoconcha sculpta
Loxoconcha sp
Loxoconcha sp. aff. L. tumida
Loxocorniculum visendum
Mackenziella lagosensis
Miocyprideis leybarensis
Mutilus falcatus
Mutilus nigeriana
Neocaudites aff. lindersae
Neocaudites atlantica
Neocaudites lindersae
Neocaudites purii
Neocaudites rectangularis
Neocaudites tuberculatus
Neocythereis nigeriensis
Neocythereis? simplex
Neomonoceratina cf. ikoroduensis
Neomonoceratina iddoensis
Neomonoceratina ikoroduensis
Neomonoceratina sp.
Neonesidea sp.
Orionina caboverdensis
Paijenborchella kuznetsovae
Paracypris sp. A
Paracytheridea sp.
Paracytheridea tschoppi
Paracytheromorpha sp.
Paradoxostoma curtum
Paradoxostoma insigne
Paradoxostoma sp.
Paranesidea multiforma
Paranesidea sp.
Perissocytheridea (K.) perfidiosa
Perissocytheridea (Kroemmelbeinella) ebutemettaensis
Perissocytheridea (Kroemmelbeinella) libidinosa
Phaeorhabdotus hazeli
Philomedes sp
Phlyctocythere hartmanni
Phlyctocythere sp.
Polycope teneriffae
Pontocythere sp.
Pseudoconcha bucculenta
Pseudoconcha hartmanni
Pseudoconcha omatsolai
Pseudoconcha sp.
Puriana aff. interrasilis
Puriana akparaia
Puriana cf. rugosa
Puriana mediocostata
Puriana rugosa
Puriana sp.
Puriana trituberculata
Pussella sp.
Reymentia ijebuorum
Reymentia microdictyota
Reymentia reticulata
Reymentia sp.
Ruggieria beninensis
Ruggieria lekki
Ruggieria martinssoni
Ruggieria nigeriana
Ruggieria sp. A
Ruggieria triangulata
Ruggieria tricostata
Schedopontocypris sp.
Semicytherura duracina
Semicytherura sp
Soudanella africana
Soudanella africana reticularis
Synasterope sp
Tanella gracilis
Triebelina intermedia
Xestoleberis cf. communis
Xestoleberis communis
Xestoleberis lenae
Xestoleberis sp
Xestoleberis toni
Source
Recent brackish water Foraminifera and Ostracoda from two estuaries in Ghana, and their potential as (palaeo) environmental indicators O. Gildeeva, L. G. Akita, J. Biehler, P. Frenzel and M. Alivernini Estuarine, Coastal and Shelf Science 2021 Vol. 256 Pages 107270
Zoogeography and biology of littoral Ostracoda from South Africa, Angola and Mozambique G. Hartmann and G. H. Schroder In: Biology and Paleobiology of Ostracoda, edited by F. M. SWAIN Paleontological Research Institution 1975 Vol. 65
Podocopid Ostracoda from the Lagos Lagoon, Nigeria M. E. Omatsola Micropaleontology 1970 Vol. 16 Issue 4 Pages 407-445
Recent and subrecent Trachyleberididae and Hemicytheridae (Ostr., Crust) from the Western Niger Delta, Nigeria M. E. Omatsola Bull. geol. lnstn Univ. Upsala 1972 Vol. 3 Pages 37-120
Holocene marine intrusions in Retba and Mbawane lakes (Senegal) evidenced by ostracod faunas R. Sarr and B. Sarr Revue de micropaléontologie 2008 Vol. 51 Issue 4 Pages 327-338
Taxonomy and biogeography of West African beach ostracods L. Witte Verhandelingen der Koninklijke Nederlandse Akademie van Wetenschappen 1993 Vol. 39
Taxonomy and zoogeography of intertidal ostracoda (Crustacea) from the Cape Verde Islands (Atlantic Ocean) K. Wouters Bulletin de l’Institut Royal des Sciences Naturelles de Belgique, Biologie 2003 Vol. 73 Pages 137-159

## Sheet: SEA
species
Aglaiella kenmckenziei
Aglaiella railbridgensis
Aglaiella westfordensis
Aglaiocypris eulitoralis
Aglaiocypris sp
Ambostracon (A.) flabellicostata
Ambostracon (A.) keeleri
Ambostracon (A.) levetzovi
Ambostracon (Patagonacythere) sp.
Ambostracon sp.
Angolacythereis clathrata
Argilloecia sp.
Asteropteron aff. nodulosum
Asteropteron cf. spinosum
Aurila dayii
Aurila kliei
Aurila levetzovi
Aurila petricola
Aurila sp
Australoecia fulleri
Australoecia sp.
Australoloxoconcha favornamentata
Australoloxoconcha parafavornamentata
Austroaurila rugosa
Bairdia problematica
Bairdia sp.
Bairdia villosa
Bairdoppilata cytheraeformis
Bairdoppilata mocamedesenis
Bairdoppilata simplex
Bairdoppilata sp
Basslerites (Loculiconcha) sp.
Bathycythere vanstraateni
Bensonia k. knysnaensis
Bensonia k. robusta
Bradleya (?Quasibradleya) sp.
Bradleya cf. B. dictyon
Bradleya sp.
Buntonia bremneri
Buntonia deweti
Buntonia gibbera
Buntonia namaquaensis
Buntonia rogersi
Buntonia rosenfeldi
Buntonia sp.
Bythocythere sp.
Bytholoxoconcha limicola
Callistocythere cf. eulitoralis
Callistocythere eulitoralis
Caudites algicola
Caudites dacunhai
Caudites knysnaensis
Caudites sp.
Caudites tankardi
Chrissia hodgsoni
Chrysocythere craticula
Chrysocythere ornata
Chrysocythere sp
Cistacythereis sp.
Cobanocythere cuneiformis
Cobanocythere sp
Cobanocythere subterranoides
Coquimba birchi
Coralliaglaia corallicola
Corallicythere verrucosa
Costa sp
Costa variornata
Cylindroleberis (Parasterope) mulleri
Cylindroleberis (Synasterope) poulseni
Cylindroleberis grimaldi
Cylindroleberis muelleri
Cylindroleberis sp
Cyprideis draaihoekensis
Cyprideis limbocostata
Cyprideis remanei
Cyprideis sp.
Cypridopsis cf. glabrata
Cypridopsis glabrata
Cypridopsis punctata
Cytherella cuneiformis
Cytherella dromedaria
Cytherella namibensis
Cytherella omatsolai
Cytherella sp. aff.C. punctata
Cytherelloidea compuncta
Cytherelloidea lobitoensis
Cytheretta knysnaensis
Cytherois minor
Cytherois sp.
Cytherois tubipenisfera
Cytheromorph milleri
Cytheropteron aff. C. frewinae
Cytheropteron cuneatum
Cytheropteron frewinae
Cytheropteron sp.
Cytheropteron trinodosum
Cytheropteron whatleyi
Cytherura arenicola
Cytherura siesseri
Doratocythere exilis
Doratocythere sp.
Elofsonia sp.
Euphilomedes africana
Euphilomedes kornickeri
Eusarsiella concentricostata
Falklandia sp.
Flagellocythere arenicola
Garciaella knysnaensis
Ghardaglaia mocambiquensis
Gomphocythere capensis
Gomphocythere obtusata
Hemicythere mirabilis
Hemicythere sp.
Hemicytherura kazmaierae
Hemicytherura parvifossata
Hemicytherura petheri
Hemicytherura sp
Hemitrachyleberis marginoaberrans
Henryhowella melobesioides
Heterocypris capensis
Ilyocypris bradyi
Incongruellina venusta
Kangarina hendeyi
Kangarina mucronata
Kangarina sola
Kangarina sp.
Krithe capensis
Krithe sp.
Krithe spatularis
Kuiperiana angulata
Kuiperiana sp.
Leptocythere hartmanni
Limnocythere inopinata
Loxoconcha algicola
Loxoconcha caerulea
Loxoconcha megapora
Loxoconcha parameridionalis
Loxoconcha peterseni
Loxoconcha sp
Loxoconcha walvisbaiensis
Macrocypria sp.
Macrocypris africana
Macrocypris cf. M. metuenda
Macrocypris dispar
Macrocypris sp.
Meridionalicythere petricola
Meridionalicythere sp.
Mesocorallicythere sagittaeformis
Microcytherura reticulata
Microloxoconcha fragilis
Munseyella eggerti
Mutilus bensonmaddocksorum
Mutilus malloryi
Mutilus sp.
Mutilus splendideornatus
Neocaudites lordi
Neocaudites osseus
Neocaudites punctatus
Neocytherideis boomeri
Neonesidea maddocksae
Neonesidea schulzi
Neonesidea sp.
Nereina? sp.
Palmoconcha subrhomboidea
Palmoconcha walvisbaiensis
Palmoconcha walvisridgensis
Palmoconcha?cf P. peterseni
Pamdoxostoma breve
Paracypretta acanthifera
Paracypris lacrimata
Paracypris westfordensis
Paracytheridea luandensis
Paracytheridea sp
Paradoloria dorsoserrata
Paradoxostoma aff. P. auritum
Paradoxostoma aff. P. luederitzensis
Paradoxostoma angolensis
Paradoxostoma angustissimum
Paradoxostoma auritum
Paradoxostoma caeruleum
Paradoxostoma caudatum
Paradoxostoma fluctusbenguelensis
Paradoxostoma griseum
Paradoxostoma luederitzensis
Paradoxostoma martinsi
Paradoxostoma obtusum
Paradoxostoma phaeophycicola
Paradoxostoma reflexum
Paradoxostoma semilunare
Paradoxostoma sp
Paradoxostoma weberi
Paradoxostoma wuenschei
Parakrithella simpsoni
Parakrithella sp
Paranesidea aff. algicola
Paranesidea aff. fracticorallicola
Paranesidea verlorevleiensis
Parvocythere dimorpha
Parvocythere directocostata
Parvocythere marginocostata
Parvocythere sp
Parvocythere striata
Perissocytheridea estuaria
Physocypria capensis
Polycope coraIIicola
Polycope essybaiensis
Polycope minuta
Polycope minutissima
Polycope quasisymmetrica
Polycope sp
Poseidonamicus panopsus
Potamocypris humilis
Procythereis foveata
Procythereis major
Procythereis minor
Procythereis serrata
Propontocypris (?Ekpontocypris) sp
Propontocypris (?Schedopontocypris) sp
Propontocypris cf. P. (P.) subreniformis
Propontocypris flava
Propontocypris gaussi
Propontocypris sp
Pseudokeijella lepralioides
Quadracythere sp
Ruggieria cytheropteroides
Ruggieria sp.
Rutiderma cf. compressa
Sarscypridopsis aculeata
Sarscypridopsis glabrata
Sarscypridopsis? reniformi
Sclerochilus disjunctus
Sclerochilus incurvatus
Sclerochilus inhambanensis
Sclerochilus sp
Semicytherura clausi
Semicytherura dayi
Semicytherura dimorpha
Semicytherura sp
Stigmatocythere sp.
Sulcostocythere knysnaensis
Tanella africana
Thalassocypria africana
Thalassocypris sp
Trachyleberis sp.
Urocythereis arcana
Urocythereis sp.
Xestoleberis aff. humilis
Xestoleberis aff. rotunda
Xestoleberis africana
Xestoleberis baja
Xestoleberis capensis
Xestoleberis crenulata
Xestoleberis ferax
Xestoleberis fracticorallicola
Xestoleberis giraulensis
Xestoleberis grave
Xestoleberis hartmanni
Xestoleberis humilis
Xestoleberis luandensis
Xestoleberis maculata
Xestoleberis porilinguata
Xestoleberis praiatofensis
Xestoleberis ramosa
Xestoleberis sp
Xestoleberis xaixaiensis
Zonocypris cordata
Source
Recent Ostracodes of Knysna Estuary, Cape Province, Union of South Africa R. H. Benson and R. F. Maddocks Publisher: Paleontological Institute, University of Kansas 1964 Vol. 5
Quaternary ostracods from the continental margin off South-Western Africa. Part 1. Dominant taxa. R. Dingle Annals of the South African Museum 1992 Vol. 102 Issue 1 Pages 1-89
Quaternary ostracods from the continental margin off South-Western Africa. Part 2. Minor taxa. R. Dingle Annals of the South African Museum 1993 Vol. 103 Issue 1 Pages 1-165
Quaternary ostracods from the continental margin off South-Western Africa. Part 3. Oceanographical and sedimentary environments R. Dingle Annals of the South African Museum 1994 Vol. 103 Issue 7 Pages 383-441
Ostracoda from Quaternary coastal sequences in the south-western Cape R. Dingle Annals of the South African Museum 1994 Vol. 104 Issue 5 Pages 63-114
Microfossils in surface sediments of brackish waters on the west coast of South Africa and their palaeoecological implications S. Fürstenberg, N. Gründler, S. Meschner and P. Frenzel African Journal of Aquatic Science 2017 Vol. 42 Issue 4 Pages 329-339
Zur Kenntnis des Eulitorals der afrikanischen Westküste zwischen Angola und Kap der Guten Hoffnung und der afrikanischen Ostküste von Südafrika und Mocambique unter besonderer Berücksichtigung der Polychaeten und Ostracoden G. Hartmann Mitteil. Hamburg. Zoolog. Mus. Inst. 1974 Vol. 69 Pages 229-521
Zoogeography and biology of littoral Ostracoda from South Africa, Angola and Mozambique G. Hartmann and G. H. Schroder In: Biology and Paleobiology of Ostracoda, edited by F. M. SWAIN Paleontological Research Institution 1975 Vol. 65
Ostracoda and Foraminifera as bioindicators of (aquatic) pollution in the protected area of uMlalazi estuary, South Africa O. Schmitz, P. Mehlhorn, J. Finch, T. Haberzettl, A. Hahn, T. Hill, et al. Revue de micropaléontologie 2024 Vol. 83 Pages 100771
