# Supplementary material
Source: Copernicus journal article supplement (doi:10.5194/egusphere-2026-775)
Supplement: Supplementary file [file egusphere-2026-775-RC2-supplement.pdf]

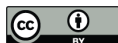

1 **Heterogeneity of tropical diversity and ecosystems: reefal meiofaunas in equatorial**  
2 **western and eastern African islands**

3

4 Skye Yunshu Tian <sup>1\*</sup>, Martin Langer <sup>1</sup>, Chih-Lin Wei <sup>2</sup>, Moriaki Yasuhara <sup>3,4</sup>

5 <sup>1</sup> Bonn Institute for Organismic Biologie, Paläontologie, Universität Bonn, Bonn, Germany

6 <sup>2</sup> Institute of Oceanography, National Taiwan University, Taipei 106, Taiwan

7 <sup>3</sup> School of Energy and Environment and State Key Laboratory of Marine Pollution, City  
8 University of Hong Kong, Yeung Kin Man Academic Building, Tat Chee Avenue, Kowloon,  
9 Hong Kong SAR, China

10 <sup>4</sup> School of Biological Sciences and Swire Institute of Marine Science, The University of Hong  
11 Kong, Kadoorie Biological Sciences Building, Pokfulam Road, Pokfulam, Hong Kong SAR,  
12 China

13 \*Correspondence [skyeystian@gmail.com](mailto:skyeystian@gmail.com)

14

15 **Abstract**

16 From an ecological perspective, oceanic islands are unique marine environments that foster  
17 endemic species and also facilitate dispersal as steppingstones, yet they are often understudied  
18 and considered missing pieces in large-scale biological patterns. In this study, we focused on  
19 ostracods and foraminifera as two representative meiobenthic groups from the São Tomé-  
20 Príncipe (STP) Archipelago in tropical east Atlantic and the Zanzibar Archipelago in west  
21 Indian Ocean. We scrutinized the diversity distribution and faunal structure of these two island  
22 regions in similar climatic and oceanographic settings in different biogeographic provinces. We  
23 found that the STP is of much lower diversity compared with species-rich Zanzibar, which is  
24 likely explained by a combination of regional, historical, and habitat factors. Within each island  
25 region, the diversity and composition of benthic assemblages vary along a habitat topographic  
26 gradient, with a primary distinction between reefal and non-reefal habitats. Furthermore, across  
27 two regions with almost completely different faunas, the ecological composition of ostracod  
28 assemblages seems to follow strong and consistent controls of benthic community in terms of  
29 the relative cover of coral, algae, and bare sand bottoms. The STP ostracod fauna shows high  
30 level of endemism within and beyond tropical east Atlantic, indicating the mid-Atlantic Barrier  
31 and Benguela Current as effective biogeographic filters. Thus, our trans-regional investigation  
32 of the exotic oceanic islands contributes to important knowledge about the general patterns and  
33 determinants of such isolated, peripheral marine ecosystems.

34

35 **1 Introduction**

36 Near-shore oceanic islands are of particular ecological and conservation importance for their  
37 unique roles as dispersal nodes and reservoirs of marine benthic diversity (Cowie and Holland,  
38 2006). The São Tomé–Príncipe Archipelago (STP) in the tropical East Atlantic (TEA) and the  
39 Zanzibar Archipelago in the western Indian Ocean (WIO) represent two such systems situated  
40 in western and eastern sides of equatorial Africa, respectively. They are in highly comparable  
41 geographic settings (i.e., close to the African continent at equatorial latitudes) and broadly  
42 similar environmental conditions (i.e., tropical shallow marine) (Da Costa et al., 2022; Tian et  
43 al., 2024a), which make them natural analogues for contrastive studies of marine diversity and  
44 community structure (Table 1 and Fig. 1). These archipelagos provide important offshore



45 habitats and nursery areas for coastal and pelagic organisms (Da Costa et al., 2022). Isolated  
 46 but not distant from the continent, they may support certain levels of endemism while  
 47 maintaining connectivity with surrounding shelf ecosystems (Maia et al., 2018). As recipients  
 48 and redistributors of tropical biotas via equatorial currents, these islands function as  
 49 steppingstones to promote faunal exchange across biogeographic provinces (Cowie and  
 50 Holland, 2006; Fajemila and Langer, 2017). At the same time, both the STP and Zanzibar  
 51 ecosystems provide essential marine resources to local communities but face severe over-  
 52 exploitation and habitat degradation, in conjunction with anthropogenic climate changes (Da  
 53 Costa et al., 2022; Bravo et al., 2021).

54

55 Table 1. Comparison of the STP and Zanzibar archipelagoes. Temperature and salinity (annual  
 56 mean of surface value) from the World Ocean Atlas 2023 (Reagan et al., 2024) and net primary  
 57 productivity from the Ocean Productivity Website  
 58 <https://orca.science.oregonstate.edu/index.php>. Shoreline data used to calculate all geographic  
 59 parameters from <https://www.naturalearthdata.com>.

|          | Region      | Temperature °C | Salinity | Net primary productivity (mgC/m <sup>2</sup> /day) | Coastline length (km) | Land area (km <sup>2</sup> ) | Distance to continent (km) |
|----------|-------------|----------------|----------|----------------------------------------------------|-----------------------|------------------------------|----------------------------|
| STP      | West Africa | 26.27          | 33.95    | 1576                                               | 185                   | 1042                         | 243                        |
| Zanzibar | East Africa | 27.32          | 35.11    | 504                                                | 767                   | 3002                         | 49                         |

60

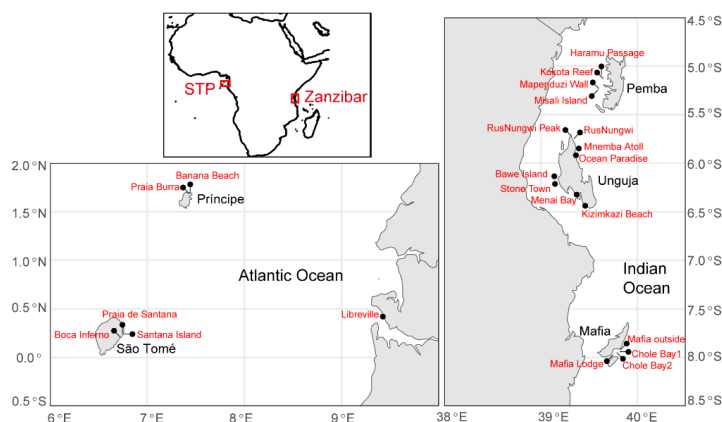

61

62 Fig. 1. Map showing the STP Archipelago in western Africa and the Zanzibar Archipelago in  
 63 eastern Africa with ostracod sampling locations.

64

65 At a larger spatial scale of biogeographic province, the biotic and abiotic contexts of these two  
 66 archipelagoes diverge sharply. The TEA is one of the least studied marine tropical provinces  
 67 characterized by low biodiversity, high productivity, and pronounced endemism (Da Costa et  
 68 al., 2022; Floeter et al., 2008; Polidoro et al., 2017). Environmentally, it is featured by complex  
 69 hydroclimatic conditions. Cold boundary currents (Canary in the north and Benguela in the  
 70 south) and seasonal upwelling along western African coast restrict the geographic range of true  
 71 tropical regions (Da Costa et al., 2022; Polidoro et al., 2017). Biogeographically, the TEA has



72 a long history of isolation with the opening of the Atlantic separating it from South America  
73 since early Jurassic; the closure of the Tethyan Seaway disconnecting it with Indo-Pacific realm  
74 during the Miocene; and finally, the establishment of the Benguela Current isolating it from  
75 southern Indian Ocean during the Pliocene (Floeter et al., 2008; Cowman et al., 2017). On the  
76 eastern side of tropical Africa, however, the western Indian Ocean (WIO) harbors a much richer  
77 shallow-marine fauna typical of coral reefs and reef-associated environments under the  
78 influence of warm Agulhas Current (Obura, 2012). The tropical section of the WIO exhibits a  
79 moderate level of endemism in the periphery of vast Indo-Pacific realm, with biogeographic  
80 affinity to both the Red Sea and central Indo-Pacific (Obura, 2012; Cowman et al., 2017). It is  
81 expected that the differences between the TEA and WIO at large regional scale should lead to  
82 idiosyncratic patterns in the diversity and composition of the STP ~~versus~~ Zanzibar faunas.

83

84 Despite their importance, a huge gap lies in our understanding of these remote oceanic islands.  
85 The studies of STP marine biodiversity have focused primarily on conspicuous groups of high  
86 economic and cultural values, such as fishes, turtles, and cetaceans (Da Costa et al., 2022;  
87 Carvalho et al., 2022; Ferreira-Airaud et al., 2022). Coastal and nearshore-pelagic fishes have  
88 been examined from ecological aspects for their ~~diversity~~ distribution and faunal composition  
89 (Porriños et al., 2024; Otero-Ferrer et al., 2020; Maia et al., 2018; Canterle et al., 2020; Tuya et  
90 al., 2017), but most other taxa are only known from fragmentary checklists. The Zanzibar is  
91 comparatively better studied for its diverse and productive reef ecosystems, with sporadic  
92 island-scale monitoring of reef ecological health (Bravo et al., 2021; Larsen et al., 2023;  
93 Grimsditch et al., 2009). Apart from corals and reef fishes, however, the majority of benthic  
94 diversity remains undocumented across habitats and environmental gradients. Therefore, an  
95 integrated and systematic investigation with multiple model organisms is ~~urgent~~ necessity for  
96 both island regions to advance our understanding of these novel biological systems and their  
97 controlling factors. It is also an important step towards effective conservation management of  
98 these island ecosystems for their ecological and economic value.

99

100 In addition to conspicuous macroinvertebrates and fish, benthic meiofaunal groups such as  
101 *Ostracoda* and foraminifera have been increasingly used as model proxies in macroecological  
102 studies. They are of high ecological importance, taking up a large proportion of total marine  
103 biodiversity (Leray and Knowlton, 2015) and performing critical ecosystem functions (Prazeres  
104 and Renema, 2019). Despite one being metazoan (ostracod) and the other protist (foraminifera),  
105 they show consistent diversity and biogeographic patterns across spatial-temporal scales and  
106 serve as surrogates for benthic fauna as a whole (Yasuhara et al., 2017; Mamo et al., 2023; Tian  
107 et al., 2024b; Baldrighi and Manini, 2015). They respond reliably and sensitively to  
108 environmental gradients and thus have high utility as bioindicators (Mamo et al., 2023; Hong  
109 et al., 2022). Last but not least, these meiofaunas leave extremely rich fossil records, which  
110 make them the ideal proxy to reconstruct historical changes and assess human impacts on  
111 biosphere over decades to hundreds of years (Yasuhara et al., 2017). In this study, we present  
112 the first island-scale survey of ostracods from STP and integrate these results with published  
113 ostracod data from Zanzibar and foraminifera data from both archipelagos. We compared alpha,  
114 beta, and gamma diversity patterns across regions and taxa to probe into the ecological and  
115 environmental structuring of benthic communities. We investigated habitat and physical  
116 controls of faunal compositions in reefal ~~versus~~ non-reefal ecosystems. Finally, we discussed  
117 the biogeographic affinity of STP within the TEA and with other tropical Atlantic provinces.  
118 Together, this study contributes to valuable knowledge on exotic island biotas and explores  
119 universality ~~versus~~ specificity in their biological patterns and drivers.



120

## 121 2 Material and methods

### 122 2.1 Regional setting

123 The São Tomé-Príncipe Archipelago is located along the Cameroon Volcanic Line at 243 km  
124 off the continental West African coast in the Gulf of Guinea (Canterle et al., 2020) (Fig. 1; Table  
125 1). It consists of two main islands, São Tomé and Príncipe, with a coastline extension of 185  
126 km and total land area of 1042 km<sup>2</sup>. Biogeographically, the archipelago is part of the Guinea  
127 Current Large Marine Ecosystem extending from Guinea Bissau to Angola within the Tropical  
128 East Atlantic (TEA) province (Fajemila and Langer, 2017). It is influenced by three incoming  
129 currents, namely the Gulf of Guinea Current from North, the Benguela Current from South, and  
130 the easterly flowing Equatorial Counter Current (Da Costa et al., 2022). The convergence of  
131 ocean currents causes seasonal equatorial upwelling and dominates regional productivity  
132 (Friedlander et al., 2014). Freshwater and particulate discharge from main rivers (Ogooué and  
133 Congo) leads to great spatial-temporal variations in salinity and turbidity in coastal waters  
134 (Friedlander et al., 2014). Steep environmental gradients occur across the upper water column,  
135 with temperature reaching typical tropical ranges of 25-29 °C at surface while dropping to ~20 °C  
136 below a constant thermocline at depths of 20-30 m, and likewise for salinity and nutrient content  
137 among other parameters (Maia et al., 2018). As constrained by regional hydrological conditions,  
138 no extensive matrix of true coral reefs exists in the Gulf of Guinea including STP, instead the  
139 benthic habitats are characterized by a mosaic of scattered rocky reefs colonized by various  
140 hard corals, turf algae, macroalgae, and sponges (Otero-Ferrer et al., 2020). Mangroves and  
141 seagrass beds are the other two major habitats along the islands' coast. In terms of substratum,  
142 a large proportion of the coastal area is covered by dark-colored volcanic sands in contrast to  
143 stable quartz sands and calcareous bioclastic sands.

144

145 The Zanzibar Archipelago is situated 49 km away from the Tanzania mainland along the East  
146 African coast (Narayan et al., 2022) (Fig. 1; Table 1). The three main islands, Pemba, Unguja,  
147 and Mafia measure a total land area of 3002 km<sup>2</sup> and a coastline of 767 km. The archipelago  
148 belongs to the Somali Coastal Current Large Marine Ecosystem that stretches from Somalia to  
149 the northeastern coast of South Africa in the western Indian Ocean (WIO) province (Thissen  
150 and Langer, 2017). Major currents influencing this region include the westward-flowing South  
151 Equatorial Current and the northward-flowing East African Coastal Current (Tian et al., 2024a).  
152 The tropical monsoonal climate regulates annual temperature variation between 25-29 °C with  
153 humid and dry seasons (Narayan et al., 2022). The Zanzibar islands possess one of the largest  
154 reef areas along the coast of East Africa, but many local reefs are in early-middle stages of  
155 degradation because of increasing marine pollution and urbanization, especially in heavily  
156 populated Stone Town areas (Grimsditch et al., 2009; Bravo et al., 2021; Larsen et al., 2023).  
157 Shallow fringing reefs and deep fore reefs are the most common habitat, followed by vegetated  
158 sand flats and mangroves. The substratum is primarily calcareous bioclastic sands in fine to  
159 medium grain size with varying amounts of reef rubble, or otherwise fine quartz sands.

160

### 161 2.2 Sample processing and data integration

162 In total ten surface sediment samples were collected from the ~~Sao Tome and Principe~~ islands in  
163 addition to one sample along continental coast in Libreville directly east of the archipelago (Fig.  
164 1). These samples cover a depth range of 0.5-30 m across the tidal and subtidal zones and  
165 represent the habitat types of marginal fringing reefs, sand flats, and mangroves. Samples were



166 collected by scuba diving to scrape along the seabed and fill plastic containers with top 2 cm of  
 167 the surface sediments, in order to avoid the loss of finer particles due to suspension. In the  
 168 laboratory, sediments were washed through a 63  $\mu\text{m}$  sieve, oven dried at 50  $^{\circ}\text{C}$ , and dry sieved  
 169 over a 150  $\mu\text{m}$  mesh sieve. Subfossil ostracods were picked from the > 150  $\mu\text{m}$  size fraction  
 170 and a single valve or a carapace was treated as one individual, which is the standard method in  
 171 ostracod research (Tian et al., 2024a). Specimens preserved with soft parts (live) were counted  
 172 together with the empty ones (dead) to make up the total, time-averaged assemblage, which is  
 173 proven to effectively define benthic habitats (Tian et al., 2024a). In the next step, we integrated  
 174 the census count of STP ostracods with previously published ostracod data from Zanzibar after  
 175 rigorous taxonomic standardization (Tian et al., 2024a). Published foraminifera data from the  
 176 two regions were integrated in the same way so that we build a trans-regional, multi-proxy,  
 177 large-size dataset of benthic meiofaunas (Thissen and Langer, 2017; Fajemila and Langer,  
 178 2017).

179

180 To evaluate the biogeography of STP and more generally the TEA, we compiled species  
 181 occurrence data of the Recent and sub-Recent shallow-marine ostracods for five tropical-  
 182 subtropical provinces in the Atlantic Ocean through extensive literature search (Table 2). The  
 183 geographic delineation of each province follows Floeter et al. (2008) and Le Lœuff and Von  
 184 Cosel (1998). Ostracod fauna of each province was compared for common species as indication  
 185 of biogeographic link. The authors ~~are fully aware that~~ the compiled species list is not  
 186 exhaustive and ~~in fact~~ many areas are poorly studied for ostracods, which leads to unavoidable  
 187 sampling bias. Nevertheless, it is believed that such compilation gives an overview of the  
 188 biogeographic relationship among provinces and hints at the evolutionary process ~~underlying~~.

189

190 Table 2. Definitions of tropical-subtropical biogeographic provinces of the Atlantic Ocean (Le  
 191 Lœuff and Von Cosel, 1998; Floeter et al., 2008) and shared number of species with STP. See  
 192 Table S4 and supplementary data for the complete species occurrence list and literature cited.

| Province               | Geographic range                                                    | Climate              | No. species | No. common species with the STP |
|------------------------|---------------------------------------------------------------------|----------------------|-------------|---------------------------------|
| Northwestern Atlantic  | Caribbean, North American coast to Carolina                         | Tropical-subtropical | 470         | 7                               |
| Southwestern Atlantic  | Brazil and Brazilian oceanic islands                                | Tropical-subtropical | 195         | 8                               |
| Northeastern Atlantic  | Western African coast from Gibraltar to Cape Blanco, Mediterranean  | Subtropical          | 497         | 7                               |
| Tropical East Atlantic | Western African coast from Cape Blanco to Moçâmedes, Gulf of Guinea | Tropical             | 151         | 22                              |
| Southeastern Atlantic  | Western African coast from Moçâmedes to Cape of Good Hope           | Subtropical          | 266         | 3                               |

193

### 194 2.3 Quantitative analyses

195 For ostracod diversity measures, we used Hill numbers (i.e., the effective number of equally  
 196 abundant species) parameterized by a diversity order  $q$  (Chao et al., 2014a). The order  $q$   
 197 determines how much weight is given to the relative abundance of species. Specifically, the



198 Hill number ( ${}^0D$ ) reduces to species richness for  $q=0$ ; the Hill number ( ${}^1D$ ) measures the  
199 diversity of the abundant species for  $q=1$ ; and the Hill number ( ${}^2D$ ) measures the diversity of  
200 dominant species for  $q=2$  (Chao et al., 2014a). To tackle the problem of unequal sample efforts  
201 among ostracod assemblages and datasets, we standardized the Hill numbers with rarefaction  
202 or extrapolation to the largest sample completeness possible for alpha diversity across samples  
203 (82.5 %) and gamma diversity across regions (96.7 %) (Chao et al., 2014b). Multiplicative beta  
204 diversity was calculated as gamma diversity divided by alpha per sample, which quantifies the  
205 extent of among-assemblage differentiation in faunal composition (Chao et al., 2023). The  
206 mean and 95% confidence intervals of the Hill numbers were estimated by bootstrap resampling  
207 with 100 repetitions. Species evenness was computed based on the slope of the Hill number  
208 profiles as a function of order  $q$  (Chao and Ricotta, 2019). In an even assemblage, the species  
209 richness and number of abundant and dominant species are similar, resulting in a more gradual  
210 slope. In contrast, an uneven assemblage is dominated by one or a few species, leading to a  
211 steeper slope. The species evenness or the normalized slopes of Hill number profiles were  
212 computed at orders  $q=1$  ( ${}^1E$ ) and  $q=2$  ( ${}^2E$ ).

213

214 We used the Generalized Additive Mixed-effect Model (GAMM) to investigate effective  
215 environmental controls of ostracod alpha diversity in each region. The environmental variables  
216 used in GAMM include habitat topographic type, algae coverage, and sediment type as habitat  
217 factors, along with human impact, water depth, and distance to land as physical factors. Each  
218 of these factors has been shown to influence the diversity distribution of benthic organisms  
219 (Porriños et al., 2024; Otero-Ferrer et al., 2020). All variables were measured on site except for  
220 distance to land, which was computed based on the distance between sampling coordinates and  
221 shoreline data from <https://www.naturalearthdata.com>. The GAMM used penalized cubic  
222 regression spline smooths with restricted maximum likelihood (REML) method (Wood, 2024).  
223 In addition to water depth and distance to land as numeric variables, habitat type (fore reef,  
224 fringing reef, back reef, sand flat, and mangrove) and sediment type (bioclastic sand, fine-  
225 grained sand, and volcanic sand) were treated as categorical variables. Algae coverage and  
226 human impact were handled as ordinal variables with three levels (i.e., low, medium, and high).  
227 GAMM estimated the fixed effects of these environmental factors on the diversity patterns. It  
228 also incorporated a random factor of island by smooths, as penalized regression terms. The  
229 evaluation of random effects helped to distinguish whether differences in biodiversity are due  
230 to site-specific conditions or are more uniformly affected by fixed factors (Wood, 2024). The  
231 comparison and ranking of GAMM models were based on AICc, which is an adjustment of the  
232 standard Akaike Information Criterion (AIC) incorporating a correction for small sample sizes.  
233 Relative model support was measured by the Akaike Weights (weight) (Anderson et al., 2000),  
234 with a higher value denoting a better fit to the data for a given number of model parameters.  
235 The parameter estimates were averaged across all candidate models weighted by their relative  
236 support. This approach accounted for uncertainty in model selection and provided appropriate  
237 confidence intervals (Anderson et al., 2000). The relative importance of a predictor variable  
238 was then determined by summing the Akaike weights of all the models in the candidate set in  
239 which that specific predictor variable occurred. The summarized top model was validated for  
240 normality and homogeneity. The spatial autocorrelation in model residues was examined by  
241 Moran's I statistic with a permutation test. No significant spatial autocorrelation was detected  
242 in the top model.

243

244 To evaluate faunal variation among ostracod assemblages, we conducted hierarchical cluster  
245 analysis based on Ward's minimum variance and Hill-number-based dissimilarity indices (1-



246  $C_{qN}$ ), where  $N$  indicates the number of assemblages for comparison and order  $q$  determines the  
247 indices' weight on relative abundance (Chao et al., 2014a). Depending on the parameter  $q$ , the  
248 Sørensen ( $q=0$ ), Horn ( $q=1$ ), and Morisita–Horn ( $q=2$ ) indices measure compositional  
249 dissimilarity in terms of species presence-absence, abundant species, and dominant species,  
250 respectively (Chao et al., 2014a). The optimal number of clusters was determined at which the  
251 average silhouette width is highest, indicating cohesion within a cluster and separation between  
252 clusters. We identified the top 10 indicator species of each cluster based on the Indicator Value  
253 (IndVal), as defined by (Dufrêne and Legendre, 1997; Cáceres and Legendre, 2009).  
254 Specifically, the IndVal was calculated as the square root of the product of relative abundance  
255 (i.e., specificity) and relative frequency (i.e., fidelity) of a species present in the defined group.  
256 The faunal composition of each sample was illustrated with a heat map showing the abundance  
257 (species count after applying a fourth root transformation) of the top 10 indicator species of  
258 each cluster, with the relationship between species determined by Hellinger distances. To  
259 examine faunal compositional changes across environmental gradients in each region, we  
260 performed non-metric multidimensional scaling (nMDS) based on the Sørensen, Horn, and  
261 Morisita–Horn dissimilarity indices and calculated the correlations between environmental  
262 variables and MDS axes with permutation tests. We also used Distance-based Redundancy  
263 Analysis (dbRDA) to measure the variance explained by each environmental variable and thus  
264 identify significant determinants of faunal structure.

265

266 All statistical analyses were replicated on the foraminifera data in exactly the same manner.  
267 Samples of low abundance (<50 individuals) were excluded from all quantitative analyses. All  
268 analyses were implemented in R (R Core Team, 2025) and RStudio (Rstudio, 2016) using  
269 *tidyverse*, *iNEXT*, *mgcv*, *MuMIn*, *hillR*, *indicspecies*, *pheatmap*, and *vegan* packages.

270

### 271 3 Results

272 Eleven samples from the STP Archipelago region yielded 2596 ostracods of 90 species. After  
273 integrating published ostracod data from Zanzibar, the resultant trans-regional dataset has 8858  
274 ostracods under 306 species. The integrated foraminifera dataset of these two regions is of a  
275 larger sample size (22515 individuals) but a lower species number (251). First of all, the most  
276 striking pattern is the depauperation of STP fauna compared with exceedingly diverse Zanzibar  
277 fauna. For both taxonomic groups, Zanzibar alpha diversity is more than twice the STP value  
278 at each order  $q$  (Figs. 2-4). At the regional level, Zanzibar gamma diversity is also markedly  
279 higher than that of STP, but this regional difference is more pronounced as recorded by  
280 ostracods than by foraminifera, especially at order  $q=0$  (Fig. 2). Beta diversity shows more  
281 complicated and contrasting patterns based on two organisms, however. In the case of ostracods  
282 at orders  $q=0$  and  $q=1$ , Zanzibar has a slightly yet significantly higher beta diversity than STP  
283 (i.e., non-overlapping 95% confidence intervals); only towards order  $q=2$  that the regional  
284 difference is conspicuous, indicating a higher variability of ostracod assemblages in terms of  
285 dominant species in Zanzibar. Interestingly, for foraminifera, beta diversity profiles of the two  
286 regions display opposite trends across the orders  $q$  (STP declining while Zanzibar increasing)  
287 so that the STP has higher diversity at orders  $q=0$  and  $q=1$  but not  $q=2$ . Indeed, in STP, high  
288 variability of rare species among foraminifera assemblages contributes to a comparatively large  
289 regional species pool (gamma) without an increase in local (alpha) diversity.

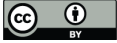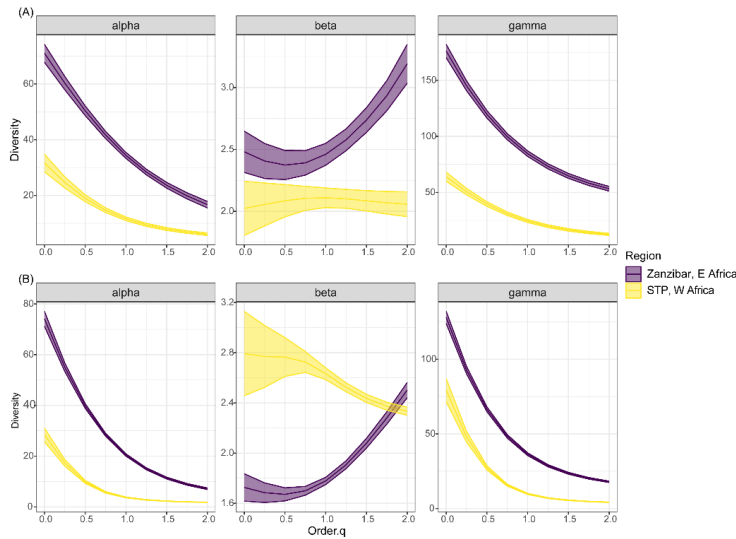

290

291 Fig. 2. Alpha, beta, and gamma diversity of the STP and Zanzibar regions for ostracods (A) and  
 292 foraminifera (B) shown by Hill number profiles. Standardized sample coverage: ostracod 82.5%  
 293 for alpha and beta, 96.7% for gamma; foraminifera 97.3% for alpha and beta, 98.9% for gamma.  
 294 The shaded area shows the 95% confidence interval of the profile.

295

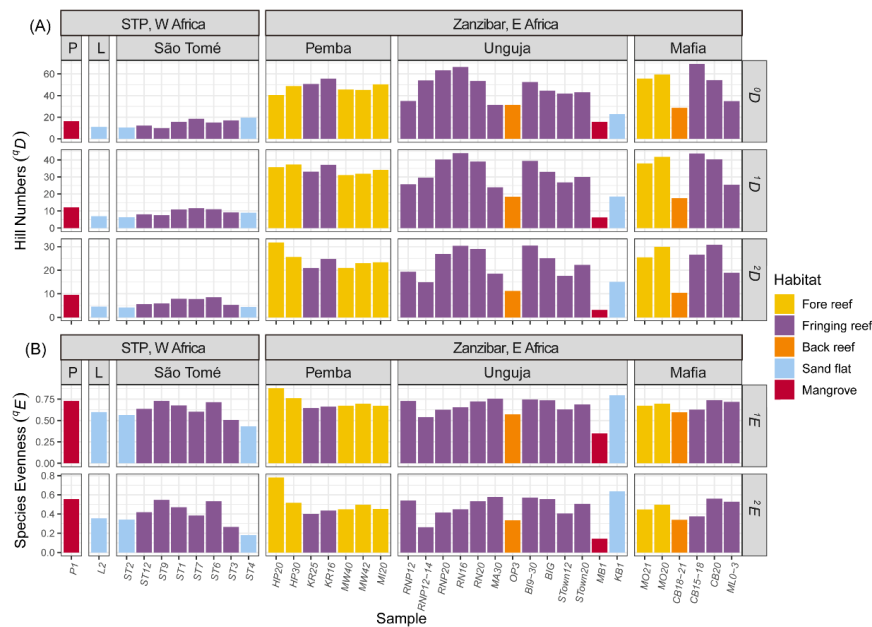

296

297 Fig. 3. Species diversity (A) and evenness (B) of ostracod assemblages across orders  $q$  from  
 298 STP and Zanzibar. The two regions show significant differences in their diversity ( $p < 0.001$ ) but  
 299 not evenness ( $p > 0.1$ ) across all orders. p-value given by ANOVA test. P: Príncipe; L: Libreville.

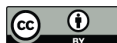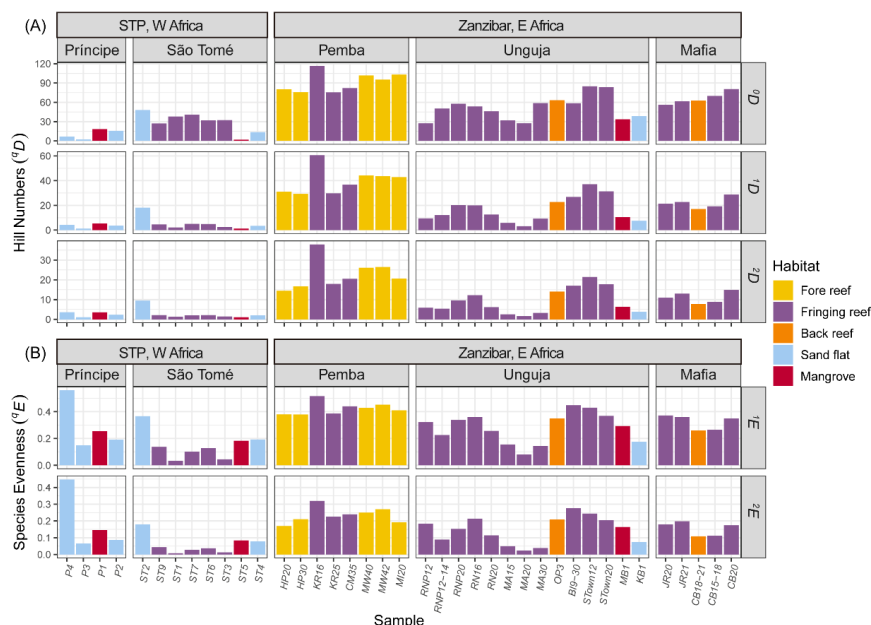

300

301 Fig. 4. Species diversity (A) and evenness (B) of foraminifera assemblages across orders  $q$  from  
 302 STP and Zanzibar. The two regions show significant differences in their diversity ( $p < 0.001$ )  
 303 and evenness ( $p < 0.05$ ) across all orders.  $p$ -value given by ANOVA test.

304

305 Within each region, both groups show generally consistent patterns in their alpha diversity and  
 306 species evenness across orders  $q$ , yet nuanced differences are also observed (Figs. 3-4). In STP,  
 307 the diversity distribution of ostracods seems to be highly homogenous among different habitat  
 308 types (Fig. 3A). Foraminifera diversity is generally high on fringing reefs, with one exception  
 309 that the sand flat at ST2 is particularly diverse (Fig. 4A). In the much richer Zanzibar region,  
 310 habitat control of species diversity is apparent for ostracods, as the highest diversity is found in  
 311 some fringing reefs followed by fore reefs, while marginal back reefs, sand flat, and mangrove  
 312 are much less diverse (Fig. 3A). Island difference in diversity is more conspicuous for  
 313 foraminifera, however. All the fore and fringing reefs in Pemba consistently record a high  
 314 number of species; in the other two islands, diversity on fringing reefs shows substantial  
 315 variation, as some sites are moderately diverse while others (e.g., MA and RNP) have diversity  
 316 as low as sand flat and mangrove (Fig. 4A). With regard to species evenness, diverse and  
 317 depauperated ostracod assemblages are of equally high levels without an obvious region or  
 318 habitat influence (Fig. 3B), suggesting similar faunal structure in terms of the proportion of rare  
 319 and dominant species. Foraminifera display a more obscure pattern in their evenness, with large  
 320 variations observed among individual samples. In particular, some fringing reefs (e.g., STs in  
 321 the STP and MAs in Zanzibar) hold highly uneven foraminifera assemblages compared to all  
 322 the rest reefal and non-reefal habitats (Fig. 4B).

323

324 Since the alpha diversity patterns of ~~two groups in two regions~~ show remarkable consistency  
 325 across all orders  $q$ , in all statistical analyses below, we focus on the order  $q=1$  for the diversity  
 326 and corresponding dissimilarity measure, **as it balances the richness and evenness components**



327 of diversity and thus has high ecological interpretability. All analyses for orders  $q=0$  and  $q=2$   
 328 give generally consistent results and are put in the online supplementary materials for  
 329 comparison (Tables S1-S2; Figs. S1-S6). First, results from GAMM modelling statistically  
 330 support our raw observations (Figs. 3-4) and further reveal environmental controls of the alpha  
 331 diversity patterns in two regions for two organisms. Habitat type is confirmed as the only  
 332 significant determinant of ostracod diversity in Zanzibar, with the reefal habitats hosting more  
 333 species than marginal and non-reefal ones (Table 3; Fig. 5A). Foraminifera instead show  
 334 significant variations across the algae coverage gradient and across islands (Table 3; Fig. 5B).  
 335 In particular, the algae effect is non-linear that diversity is lowest at medium coverage compared  
 336 to low or high coverage. In STP, GAMM identifies no significant controls for both groups,  
 337 which fits our expectations as their diversity distributions are largely homogenous along all  
 338 environmental dimensions.

339

340 Table 3. Environmental controls of ostracod and foraminifera alpha diversity ( $q=1$ ) in Zanzibar.  
 341 Statistics from GAMM modelling showing the significant parameters in the averaged top model.  
 342 RI: relative importance; L: linear term; Q: quadratic term.

| Organism     | Term                  | Estimate | Std. Error | t value | Pr(> t ) | RI   |
|--------------|-----------------------|----------|------------|---------|----------|------|
| Ostracod     | (Intercept)           | 3.57     | 0.06       | 56.31   | 0        |      |
|              | Habitat-Fringing reef | -0.05    | 0.08       | -0.59   | 0.56     | 0.94 |
|              | Habitat-Back reef     | -0.69    | 0.24       | -2.81   | 0.01**   | 0.94 |
|              | Habitat-Sand flat     | -0.66    | 0.33       | -1.99   | 0.06     | 0.94 |
|              | Habitat-Mangrove      | -1.75    | 0.97       | -1.81   | 0.08     | 0.94 |
| Foraminifera | (Intercept)           | 3.37     | 0.25       | 13.38   | 0        |      |
|              | Algae coverage. L     | -0.02    | 0.39       | -0.06   | 0.95     | 0.83 |
|              | Algae coverage. Q     | 0.72     | 0.25       | 2.85    | 0.01*    | 0.83 |
|              | s(Island)             | 0.83     | 2          | 2.37    | 0.03*    | 0.85 |

343

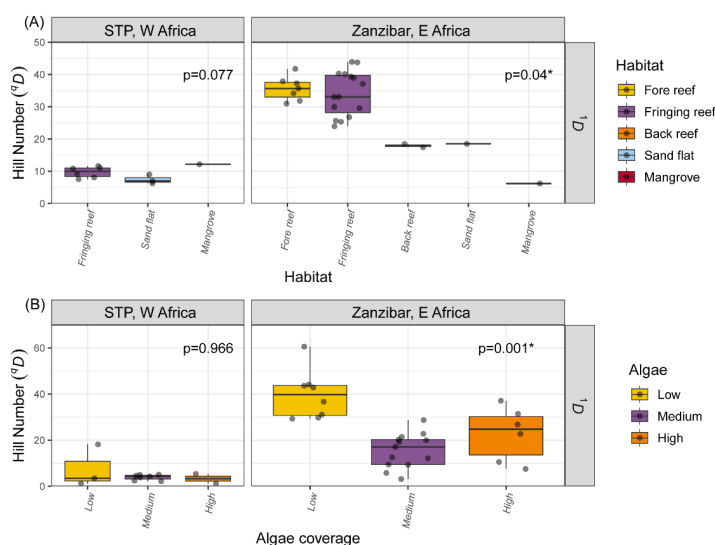

344

345 Fig. 5. Box plots showing variations in ostracod alpha diversity between habitat types (A) and  
 346 foraminifera alpha diversity between algae coverage levels (B) for order  $q=1$  in STP and  
 347 Zanzibar regions. p-value given by the Kruskal-Wallis test.



348

349 Next, the cluster analysis delineates six distinct clusters for both groups in two regions, and the  
350 nMDS visualizes the separation of clusters correlated with environmental variables (Figs. 6-7).  
351 In the case of ostracods, the Zanzibar and STP faunas are almost completely different with only  
352 few species in common across regions (Fig. 6A). The ostracod assemblages in Zanzibar fall  
353 into four clusters: C1 characterizes the fringing reefs of intermediate water depths, medium  
354 algae cover, and medium human impact from Unguja and Mafia islands; C2 includes all shallow  
355 samples from mangrove and sand flat habitats with high algae cover; C3 aggregates all the deep,  
356 pristine fore reefs from Pemba Island with low algae cover and large distance off shore; and  
357 lastly C4 is geographically confined to the Stone Town area near the center of human impact  
358 (Figs. 6A and 7B). In STP, the two ostracod clusters clearly distinguish deep reefal (C5) and  
359 shallow non-reefal assemblages (C6) (Figs. 6A and 7A). They also reflect variations in other  
360 environmental dimensions such that C5 is bioclastic sand with medium levels of algae cover  
361 and human impact while C6 is unique volcanic sand. The dbRDA analysis for ostracods in each  
362 region consistently indicates that habitat type is the most important controlling factor of species  
363 composition, followed by algae coverage and human impact (Table 4), whereas all other  
364 parameters do not have a significant effect. In the case of foraminifera, there seems to be some  
365 degree of faunal similarity between regions (Fig. 6B). The Zanzibar assemblages are separated  
366 into three clusters: C1 clumps together all the true reefs in intermediate and deep waters across  
367 all algae cover and human impact levels; C2 groups unique fringing reefs in Mnemba Atoll with  
368 a sand flat; and C3 characterizes mangrove habitat with high algae cover (Figs. 6B and 7D).  
369 Among three clusters in STP, C5 is typical of deep fringing reefs while C4 and C6 represent a  
370 mixture of sand flat and mangrove habitats with all different levels of algae cover and various  
371 sediment types (Figs. 6B and 7C). The dbRDA analysis for foraminifera reveals that habitat  
372 type alone explains a large proportion of variances in faunal compositions in both regions,  
373 although the effects of algae coverage, human impact, and distance to shore are also significant  
374 in Zanzibar (Table 4).

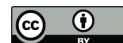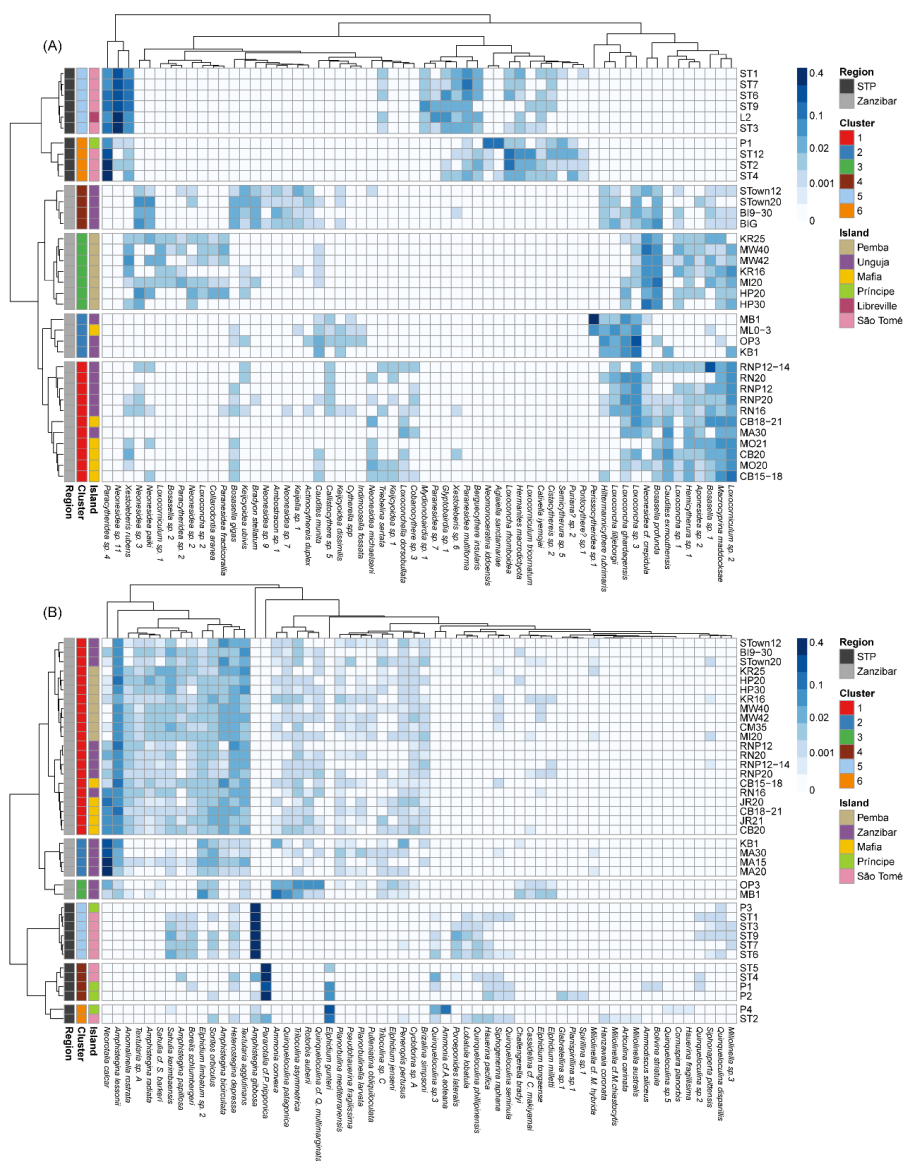

375

376 Fig. 6. Composition of ostracod (A) and foraminifera (B) assemblages in STP and Zanzibar in  
 377 terms of the top 10 indicator species of each cluster at order  $q=1$ . The blue heatmaps illustrate  
 378 species count in each sample after applying a fourth root transformation. Dendrograms based  
 379 on Horn dissimilarity between samples and Hellinger distances between species.

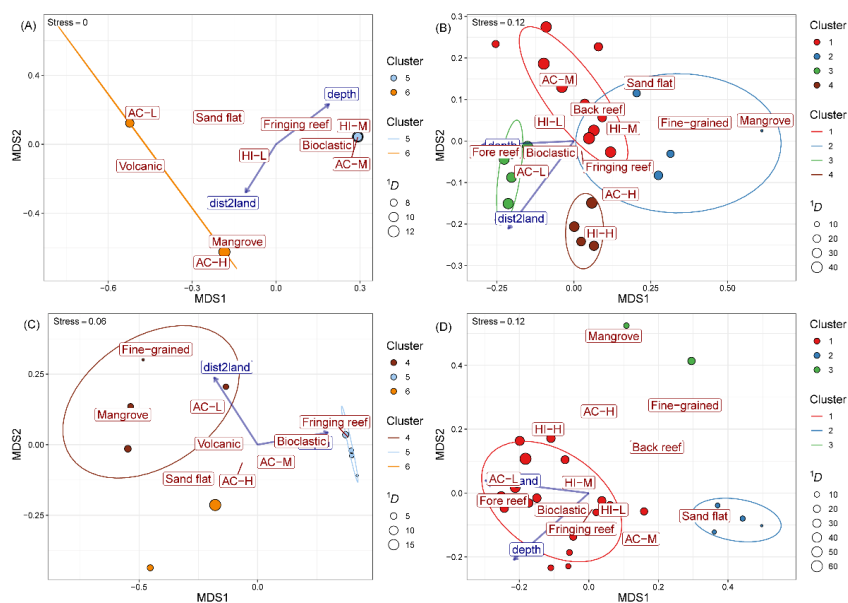

380

381 Fig. 7. nMDS ordination showing faunal variation correlated with environmental factors in each  
 382 region for each organism. (A) STP ostracods; (B) Zanzibar ostracods; (C) STP foraminifera;  
 383 (D) Zanzibar foraminifera. The vectors indicate correlations with continuous environmental  
 384 variables and labels indicate the centroids of categorical environmental variables. AC: algae  
 385 coverage; HI: human impact; H: high; M: medium; L: low. Color of each cluster as in Fig. 6.  
 386 Size of sample dots represents alpha diversity at order  $q=1$ .

387

388 Table 4. Environmental controls of ostracod and foraminifera faunal composition ( $q=1$ ) in  
 389 Zanzibar and STP by dbRDA analysis. Only significant effects are shown.

| Organism     | Region             | Predictor      | SumOfSqs | F value | Pr(>F)   |
|--------------|--------------------|----------------|----------|---------|----------|
| Ostracod     | Zanzibar, E Africa | Habitat type   | 1.36     | 5.11    | 0.001*** |
|              |                    | Algae coverage | 0.88     | 6.6     | 0.001*** |
|              |                    | Human impact   | 0.57     | 4.28    | 0.001*** |
|              | STP, W Africa      | Habitat type   | 0.46     | 17.06   | 0.009**  |
|              |                    | Algae coverage | 0.33     | 23.98   | 0.003**  |
|              |                    | Human impact   | 0.22     | 16.49   | 0.002**  |
| Foraminifera | Zanzibar, E Africa | Habitat type   | 0.81     | 8.97    | 0.001*** |
|              |                    | Algae coverage | 0.68     | 15.06   | 0.001*** |
|              |                    | Human impact   | 0.45     | 10.01   | 0.001*** |
|              |                    | dist2land      | 0.1      | 4.22    | 0.008**  |
|              | STP, W Africa      | Habitat type   | 1.62     | 8.67    | 0.01**   |

390

391 Knowing that ostracod assemblages in both regions show primary distinction between reefal  
 392 and non-reefal habitats, we examine the ecological composition of each cluster and compare  
 393 between regions. We look into the top 10 genera of highest mean relative abundance in each  
 394 cluster, since the ecology of individual species is often not understood, especially in STP where

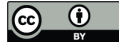

395 a lot of new species are found, and also because genus-level patterns give more generality. The  
 396 top 10 ostracod genera can be classified into five major ecological groups, which are coral reef  
 397 affiliated, phytal, bottom dwelling, euryhaline, and the remaining non-specific (Fig. 8; Table  
 398 S3). *Neonesidea* and family Bairdiidae in general typically inhabit coral reefs and reef-  
 399 associated habitats in tropical shallow-marine environments (Titterton and Whatley, 1988;  
 400 Whatley and Watson, 1988). These reefal genera are most abundant on the fringing reefs of C5  
 401 in STP and the pristine fore reefs of C3 in Zanzibar, and secondarily on the fringing reefs of C1  
 402 and C4 in Zanzibar. Phytal ostracods live on plant substrates including seagrass, macro algae,  
 403 and turf algae (Kamiya, 1988). *Loxoconcha* and *Xestoleberis* as two well-known phytal genera  
 404 (Keyser and Mohammed, 2021) dominate the mangrove and sand flat habitats of C2 in Zanzibar  
 405 and weight similarly in their relative abundance among other clusters. On the contrary, sediment  
 406 dwelling ostracods live on the surface of sand bottoms or the interstices of sand grains, with  
 407 morphologically a flat ventral surface to adapt to their mode of life (Kamiya, 1988; Purper and  
 408 De Orenellas, 1987). This group is represented by *Paracytheridea* in our samples, which is  
 409 particularly abundant in the non-reefal habitats of C6 in STP. The euryhaline group consisting  
 410 of *Perissocytheridea* and *Cyprideis* (Keyser, 1977; Wouters, 2017) is mostly confined to C2 in  
 411 Zanzibar and C6 in STP, indicating possible brackish conditions of these shallow intertidal  
 412 habitats. Thus, the reefal assemblages (C1, C3, C4, and C5) manifest great similarities in their  
 413 ecological composition across regions, and likewise for non-reefal assemblages (C2 and C6),  
 414 despite little taxonomic overlap of two regions.

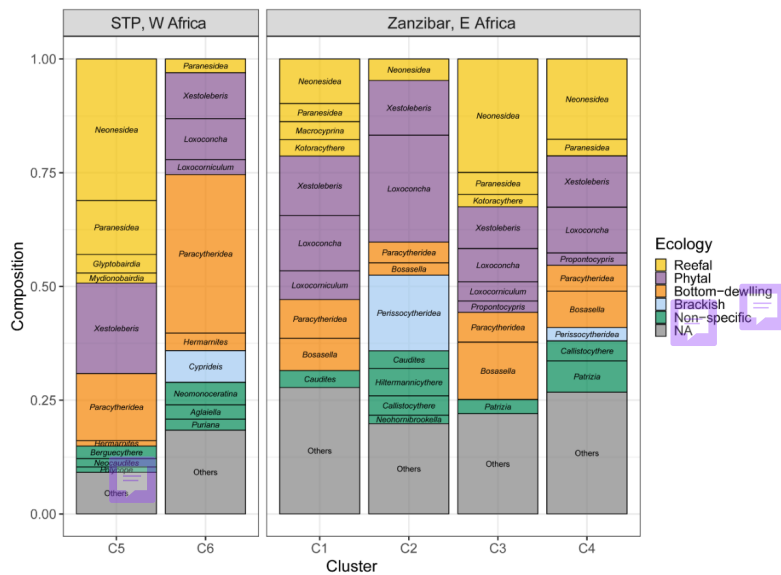

415

416 Fig. 8. Proportional composition of ostracod clusters at order  $q=1$  with ecological groups shown  
 417 by colors. The top 10 genera of highest mean relative abundance in each cluster are assigned to  
 418 one of the ecological groups, i.e., reefal, phytal, bottom-dwelling, brackish, or non-specific. All  
 419 genera other than the top 10 are grouped as 'Others' and their ecology is not considered. See  
 420 Table S3 for genus autoecology and literature cited.

421

422 Our biogeographic investigation indicates that the ostracod fauna in STP has potentially a high  
 423 level of endemism within and beyond the TEA province (Table 2; Fig. 9; Table S4). There are  
 424 22 species in STP shared with tropical continental areas of west Africa, the Gulf of Guinea in



425 particular. The biogeographic connections of STP with all other Atlantic provinces are much  
426 weaker, i.e., 7 species in common with the Northwestern and Northeastern Atlantic, 8 species  
427 with the Southwestern Atlantic, and only 3 species with the Southeastern Atlantic. The STP and  
428 Zanzibar faunas in our dataset overlap with 11 ostracod species and 16 foraminifera species, on  
429 the other hand.

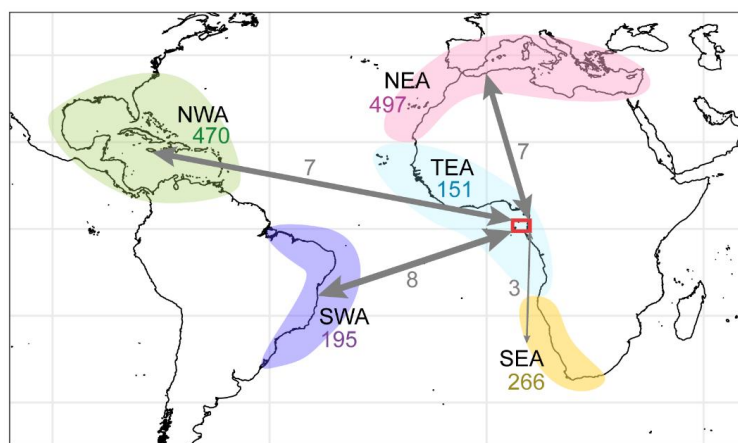

430

431 Fig. 9. Schematic map showing the biogeographic relationship of STP with tropical-subtropical  
432 Atlantic provinces. Each colored number indicates the number of species described in each  
433 province. Thickness of the arrow with number over it indicates connectivity by the number of  
434 common species. Red box indicates STP. NWA: Northwestern Atlantic; SWA: Southwestern  
435 Atlantic; NEA: Northeastern Atlantic; TEA: Tropical East Atlantic; SEA: Southeastern Atlantic.

436

#### 437 4 Discussion

##### 438 4.1 Impoverishment of the STP fauna in the TEA province

439 First of all, ostracods and foraminifera concordantly show exceptionally high Zanzibar diversity  
440 in contrast to low STP diversity at both local (alpha) and regional (gamma) scales. This mirrors  
441 broader patterns of species richness in the WIO versus TEA based on other benthic groups  
442 (Cowman et al., 2017; Tittensor et al., 2010), confirming the usefulness of meiofaunal proxies  
443 in macroecological studies. The impoverishment of STP fauna is likely due to environmental  
444 and historical constraints acting in conjunction. In the TEA along the west African coast, cold  
445 boundary currents and seasonal coastal upwelling restrict the geographic range of true tropical  
446 segments (Da Costa et al., 2022) and also inhibit the growth of large coral reefs where high  
447 benthic diversity is usually located (Friedlander et al., 2014). Moreover, the coastline is mostly  
448 straight, and the continental shelf is very narrow and dominated with monotonous sandy and  
449 muddy bottoms (Polidoro et al., 2017; Friedlander et al., 2014). In fact, the TEA has the smallest  
450 shelf area of the world's main tropical regions (Polidoro et al., 2017). Small habitat areas may  
451 not support high biodiversity as predicted by the species-area relationship (Losos and Schluter,  
452 2000), and low habitat complexity limits the potential of allopatric speciation (Bellwood et al.,  
453 2012). Over the evolutionary history of the TEA, increasing isolation had made it difficult to  
454 receive species from other regions, especially the biodiversity hotspots in Caribbean and  
455 broadly Indo-Pacific realm (Floeter et al., 2008). All these environmental and biogeographic  
456 factors disfavor the origin and preservation of high biodiversity, and together they may account



457 for the **depauperation** of the TEA province and subsequently the low diversity in STP, since the  
458 oceanic islands are integral components of larger biogeographic regions.

459

460 In contrast to an explicit, unambiguous pattern of regional differences in alpha and gamma  
461 diversity, beta diversity of STP and Zanzibar shows inconsistent variations across orders  $q$  for  
462 ostracods and foraminifera, which implies some ecological distinction between two groups and  
463 different mechanisms underlying their community assembly (Fig. 2). For ostracods, across the  
464 regional diversity gradient, it appears that the richness of local assemblage approximately scales  
465 to the size of regional species pool (i.e., similar levels of beta diversity at  $q=0$  in two regions),  
466 indicating that the ostracod communities are regionally enriched (Devantier et al., 2020). Strong  
467 evidence for regional enrichment of biodiversity has been found in corals and marine epifaunal  
468 invertebrates in general (Devantier et al., 2020; Witman et al., 2004), and **it is widely**  
469 **acknowledged that local diversity is shaped by processes operating on larger spatial scales.** At  
470 Order  $q=2$ , however, elevated beta diversity of dominant species in Zanzibar may reflect a  
471 higher habitat diversity there, as the dominant species are usually well-adapted to certain  
472 habitats. The transitions from mature to marginal reefs and eventually to non-reefs across a  
473 large environmental gradient correspond to fundamental shifts in the well-adapted ostracod  
474 composition. Unexpectedly for foraminifera across two regions, beta diversity is higher in STP  
475 at orders  $q=0$  and  $q=1$  with a comparatively large regional species pool yet low local richness.  
476 Instead of a saturation effect on local assemblages, i.e., biotic interactions limit the number of  
477 species that may coexist locally (Devantier et al., 2020), it is more likely that certain  
478 environmental filtering determines the spatial patterns of species occurrence as many species  
479 have narrow and specific habitat ranges in STP (Fajemila and Langer, 2017). For example,  
480 *Ammonia* cf. *A. aoteana* is exclusively found in the sand flat of P4 while *Glabratellina* *sp.1* is  
481 specific to the sand flat of P2 (Fig. 6B). Strict environmental structuring of foraminifera  
482 assemblages for rare and abundant species thus translates to profound changes in species  
483 composition across sites, which collectively add up to a comparatively large regional species  
484 pool in STP. The scenario in Zanzibar is quite the opposite that low beta diversity at orders  $q=0$   
485 and  $q=1$  is accounted by homogenous species distributions among most of the reefal habitats.  
486 Finally at order  $q=2$ , STP and Zanzibar foraminifera reach similar levels of beta diversity with  
487 each cluster dominated by few well-adapted species (e.g., *Neorotalia calcar* in C2, *Pararotalia*  
488 cf. *P. nipponica* in C4, and *Amphistegina gibbosa* in C5) (Fig. 6B) (Fajemila and Langer, 2017;  
489 Thissen and Langer, 2017). Comparing the beta diversity patterns of two taxonomic groups,  
490 our results tentatively indicate that the local-regional relation of biodiversity may be twisted by  
491 environmental conditions for different organisms depending on their ecology.

492

#### 493 4.2 Environmental control of local diversity and faunal composition

494 The GAMM modelling reveals that environmental effects on local diversity vary between two  
495 organisms and between two regions (Table 3). In Zanzibar, ostracod local diversity is regulated  
496 by habitat type as the fore and fringing reefs with high topographic complexity support more  
497 diverse assemblages compared to marginal reefs, mangroves, and featureless soft bottom  
498 habitats (Fig. 5A). Diversity is particularly high on some fringing reefs with medium algae  
499 coverage (e.g., RNs and CBs) (Fig. 3A), likely because interlaced hard corals, macro algae, and  
500 turf algae offer diverse and heterogenous microhabitats to accommodate different ecological  
501 groups (Tian et al., 2024a). It is intriguing that the local diversity of foraminifera in Zanzibar  
502 responds nonlinearly to the algae factor with the lowest diversity at medium coverage (e.g.,  
503 MAs and RNPs) (Figs. 4A and 5B). In fact, many sites with medium algae coverage can be  
504 characterized as transitional environments between hard and soft bottoms, where the sediments



505 are homogenous, medium-grained bioclastic sands. These sites are idiosyncratic ~~in terms of not~~  
506 ~~only diversity~~ but also composition (e.g., the MAs form its own foraminifera cluster C2) (Fig.  
507 6B). Neither reefal nor phytal foraminifera flourish in such environments, so that local diversity  
508 records the lowest level. This is in sharp contrast to the ostracod pattern that various ecological  
509 groups overlap in algae-covered reefal habitats to achieve high diversity, which conforms to the  
510 classic intermediate disturbance hypothesis (Viljur et al., 2022; Townsend et al., 1997). A  
511 possible explanation for foraminifera ~~being a contrarian in this regard~~ is that they may have  
512 high ecological specialization and specific habitat requirements, which make them avoid  
513 transitional algae-covered environments. Then, in STP, the local diversity of both groups does  
514 not evidently follow any environmental regulations tested (Fig. 5). Diversity distribution is  
515 essentially uniform for ostracods while site-specific for foraminifera. As the seascape is  
516 predominantly sandy and muddy bottoms along the west African coast (Friedlander et al., 2014),  
517 small fringing reefs in STP may provide one of the few hard substrates in this region for reef  
518 organisms yet they lack the topographic complexity required to host high diversity like true  
519 tropical coral reef ecosystems. Consequently, there are no locally diverse benthic assemblages  
520 in STP.

521

522 The dbRDA analysis demonstrates that environmental controls over faunal composition are  
523 highly concordant for ~~two organisms~~ in two regions, with habitat type being of overwhelming  
524 importance (Table 4). Reefal and non-reefal assemblages are fundamentally divergent as they  
525 show widest separation in cluster and nMDS analysis (Figs. 6-7). Among various types of reefal  
526 habitats, algae coverage further differentiates local assemblage compositions, as the pristine  
527 Pemba reefs dominated by hard corals (ostracod cluster C3) have lower abundance of phytal  
528 species as compared to all other moderately algae-covered reefs. The effects of human impact  
529 are weaker and mostly apparent at the highest level of disturbance, as the Stone Town sites  
530 (ostracod cluster C4) are characterized by some Trachyleberididae genera (e.g., *Actinocythereis*)  
531 but their ecological significance is not well understood in this case (Tian et al., 2024a). Thus,  
532 the delineation of ostracod clusters directly and specifically reflects the interacting effects of  
533 habitat, algae, and human factors. With regard to foraminifera, apart from aforementioned  
534 environmental drivers, distance to land also explains a minor proportion of faunal variance in  
535 Zanzibar, as indicated by the dominance of opportunistic taxa (e.g., *Ammonia convexa*) in  
536 nearshore lagoonal and mangrove sites (foraminifera cluster C3) (Thissen and Langer, 2017).

537

538 Despite distinct taxonomic compositions of the STP and Zanzibar faunas at species and even  
539 genus level, there is a marked inter-regional convergence in the ecological structure of ostracod  
540 reefal and non-reefal assemblages in terms of the proportions of coral, phytal, bottom-dwelling,  
541 and euryhaline taxa (Fig. 8). The fringing reef cluster (C5) in STP and pristine fore reef cluster  
542 (C3) in Zanzibar both show highest abundance of coral affiliated taxa, while the other two reefal  
543 clusters with algae cover (C1 and C4) in Zanzibar have comparatively more phytal taxa besides  
544 coral taxa. Regarding the non-reefal clusters, C6 in STP is dominated by bottom-dwelling and  
545 secondarily phytal taxa, in addition to a small proportion of euryhaline and almost no coral taxa.  
546 C2 in Zanzibar is instead comprised of primarily phytal taxa followed by euryhaline and lastly  
547 bottom-dwelling taxa. The discrepancy between non-reefal clusters C6 and C2 is likely caused  
548 by low vegetation coverage in the sand flat habitats in STP, where sea floor is mostly bare, so  
549 that the bottom-dwelling taxa thrive while the phytal taxa ~~perish~~. The exclusive occurrence of  
550 euryhaline taxa in the non-reefal intertidal clusters indicates salinity variations there, in contrast  
551 to normal marine conditions in deeper subtidal environments. Our trans-regional comparison  
552 clearly demonstrates a persistent correspondence between ostracod ecological structure and



553 environmental character. Specifically, the relative abundances of coral-affiliated, phytal, and  
554 bottom-dwelling taxa seem to vary predictably along a benthic community gradient depending  
555 on the percentage coverage of hard corals, algae and bare sands. Although more studies from  
556 other regions are imperative to test the generality of this pattern, the findings presented here are  
557 considered illuminating. Ostracods can potentially be an indicator of reef condition to track the  
558 degradation from coral- to algae-dominated states (Tian et al., 2024a), if a quantitative  
559 correlation is established between ostracod ecological composition and benthic community in  
560 tropical reefs and reef-associated habitats.

561

#### 562 4.3 Biogeography of STP ostracods

563 Our data suggests high endemism of STP ostracods since many new species (52 out of 90) are  
564 found here. However, undersampling of the TEA ostracods complicates firm conclusions and  
565 chances are that some of our species may actually have undocumented distributions in coastal  
566 West Africa and thus are not true STP endemics. Outside of the TEA, STP ostracods show weak  
567 biogeographic connectivity with other tropical Atlantic regions as indicated by the low number  
568 of common species (Table 2; Fig. 9). In the west, the mid-Atlantic Barrier (deep and wide  
569 Atlantic itself) effectively isolates the TEA from West Atlantic but is occasionally permeable  
570 through the easterly flowing Equatorial Counter Currents (Floeter et al., 2008; Fajemila and  
571 Langer, 2017). Indeed, there are many characteristic West Atlantic genera found in STP,  
572 including *Neocaudites*, *Puriana*, and *Cativella* (Omatsola, 1972; Coimbra et al., 2004). The  
573 STP ostracod is slightly more similar to the Southwestern Atlantic fauna at species level despite  
574 the Northwestern Atlantic being much more speciose as a biodiversity hotspot, which is likely  
575 due to the difference in geographic distance (~3500 km from the Brazil and ~8696 from the  
576 Caribbean) (Da Costa et al., 2022). In the north, subtropical species from the Mediterranean  
577 and Northwest African coast may be brought southward by the Canary Current and further  
578 dispersed by the Gulf of Guinea Current (Le Lœuff and Von Cosel, 1998). STP ostracods  
579 therefore hold certain similarity with the Northeastern Atlantic fauna. Interestingly, with the  
580 major biogeographic barrier of the Benguela Current in the south, STP shares 11 species in  
581 common with Zanzibar but only 3 with the Southwest African coast, for which there are three  
582 possible explanations. First, foraminifera evidence shows that the Benguela barrier could be  
583 breached when warm water Agulhas eddies pinched off into the South Atlantic during  
584 interglacial (i.e., the Agulhas leakage hypothesis) (Gordon, 2003). Some amphisteginid  
585 foraminifera from the warm WIO managed to colonize the Atlantic in this way, but their  
586 populations in colder Southwest Africa became locally extinct during glacial intervals and  
587 eventually only the TEA populations survived until today (Fajemila and Langer, 2017). We  
588 suggest that ostracods may undergo similar processes in history. For example, *Kotoracythere*  
589 *inconspicua* and *Keijia demissa* as two common species in STP and Zanzibar are known to  
590 originate during late Miocene in the Indo-Pacific and display pan-tropical distributions today  
591 (Sridhar et al., 2007; Coimbra et al., 1999). It is likely that they took the dispersal route from  
592 the Indo-Pacific to TEA through South Africa, since the Tethyan Seaway had already been  
593 closed by late Miocene. Second, some common species in STP and Zanzibar are Tethyan relicts,  
594 *Paracytheridea tschoppi* for instance (Coimbra et al., 1999). This species dispersed into the  
595 Atlantic and Indo-Pacific before the closure of the Tethyan Seaway and experienced a long  
596 period of evolutionary stasis (Coimbra et al., 1999). Lastly, low faunal overlap between STP  
597 and Southwest Africa could be caused by sampling bias, but the relatively large species pool of  
598 the Southwest Africa province makes this explanation less plausible. In summary, although our  
599 biogeographic study here is not corrected for uneven sampling efforts and patchy geographic  
600 coverage in each province, it builds a reasonably solid basic framework of ostracod  
601 provinciality in the tropical Atlantic. Ostracods have low dispersal capacity because they do not  
602 have a planktic larvae stage, unlike foraminifera and many other benthic groups (Yasuhara et  
603 al., 2017); yet some species still achieve transoceanic and even cosmopolitan distribution being  
604 passively carried by floating algae, migratory birds, and vessels. The coexistence of wide-



605 ranging species together with many endemic species in the oceanic islands of STP invokes  
606 further surveys to understand ostracod provinciality and dispersal vectors, in face of increasing  
607 anthropogenic transport.

608

## 609 **5 Conclusion**

610 Our comparative study of meiobenthic faunas from STP and Zanzibar reveals the patterns and  
611 determinants of these unique island ecosystems reflecting both universal ecological rules and  
612 region-specific conditions. Diversity of each region largely mirrors the larger-scale patterns of  
613 biogeographic provinces, with very high diversity on coral reefs in Zanzibar within the rich  
614 ~~WIO while uniformly low diversity~~ across habitats in STP within the impoverished TEA.  
615 Habitat type is the most important factor accounting for faunal variability within each region to  
616 define basically the reefal and non-reefal assemblages, and algae coverage further impacts the  
617 relative dominance of coral-affiliated, phytal, and bottom-dwelling taxa to subdivide these  
618 assemblages. Ostracods and foraminifera as important members of meiobenthic community  
619 show overall consistency in their diversity and composition patterns within and between regions.  
620 However, minor differences are most probably explained by high ecological specialization and  
621 habitat requirements of foraminifera, so that they have higher compositional changes across  
622 environments and low diversity in transitional environments. Finally, STP ostracod fauna  
623 seemingly shows high level of endemism in the isolated TEA province, but our understanding  
624 of their large-scale biogeographic patterns and dispersal pathways is extremely deficient. We  
625 appeal to future studies to investigate the diversity and distribution of ostracods on coral reefs  
626 from larger geographic regions to fully explore the ecological and conservation significance of  
627 these fascinating benthic organisms. At the same time, high endemism in STP emphasizes the  
628 need for targeted conservation of these little-studied yet vulnerable island ecosystems.

629

## 630 **Data availability**

631 All data supporting this manuscript (ostracod and foraminifera census data; ostracod occurrence  
632 data from tropical Atlantic) is included in the Supplement.

633

## 634 **Author contributions**

635 SYT and ML developed the concept. ML collected ~~and~~ samples. SYT carried out the  
636 experiments and collected the data. SYT and CLW performed the data analyses. SYT drafted  
637 the manuscript. ML, MY, and CLW reviewed and edited the manuscript.

638

## 639 **Competing interests**

640 The authors declare that they have no conflict of interest.

641

## 642 **Acknowledgements**

643 We thank Ute Möller for her assistance in the laboratory.

644

## 645 **Financial support**



646 This research has been supported by the Alexander von Humboldt Research Fellowship (to  
647 SYT) and the Deutsche Forschungsgemeinschaft (grant no. TI 1364/2-1, to SYT; grant no. LA  
648 884/10-1, to ML); the Research Grants Council, University Grants Committee (grant nos. HKU  
649 17306023 and G-HKU709/21, to MY); and the National Science and Technology Council  
650 (grant no. NSTC 112-2611-M-002-011, to CLW).

651

## 652 References

- 653 Anderson, D. R., Burnham, K. P., and Thompson, W. L.: Null hypothesis testing: problems,  
654 prevalence, and an alternative, *The journal of wildlife management*, 912-923,  
655 <https://doi.org/10.2307/3803199>, 2000.
- 656 Baldrighi, E. and Manini, E.: Deep-sea meiofauna and macrofauna diversity and functional  
657 diversity: are they related?, *Marine Biodiversity*, 45, 469-488, [https://doi.org/10.1007/s12526-](https://doi.org/10.1007/s12526-015-0333-9)  
658 [015-0333-9](https://doi.org/10.1007/s12526-015-0333-9), 2015.
- 659 Bellwood, D. R., Renema, W., and Rosen, B. R.: Biodiversity hotspots, evolution and coral reef  
660 biogeography, in: *Biotic Evolution and Environmental Change in Southeast Asia*, Cambridge  
661 University Press, Cambridge, 216-245, <https://doi.org/10.1017/CBO9780511735882.011>, 2012.
- 662 Bravo, H., Cannicci, S., Huyghe, F., Leermakers, M., Sheikh, M. A., and Kochzius, M.:  
663 Ecological health of coral reefs in Zanzibar, *Reg. Stud. Mar. Sci.*, 48, 102014,  
664 <https://doi.org/10.1016/j.rsma.2021.102014>, 2021.
- 665 Cáceres, M. D. and Legendre, P.: Associations between species and groups of sites: indices and  
666 statistical inference, *Ecology*, 90, 3566-3574, <https://doi.org/10.1890/08-1823.1>, 2009.
- 667 Canterle, A. M., Nunes, L. T., Fontoura, L., Maia, H. A., and Floeter, S. R.: Reef microhabitats  
668 mediate fish feeding intensity and agonistic interactions at Príncipe Island Biosphere Reserve,  
669 Tropical Eastern Atlantic, *Mar. Ecol.*, 41, e12609, <https://doi.org/10.1111/maec.12609>, 2020.
- 670 Carvalho, I., Pereira, A., Martinho, F., Vieira, N., Brito, C., Guedes, M., and Loloum, B.:  
671 Cetaceans of São Tomé and Príncipe, in: *Biodiversity of the Gulf of Guinea Oceanic Islands*,  
672 edited by: Luis M. P. Ceriaco, R. F. d. L., Martim Melo, Rayna C. Bell, Springer, 621-641, 2022.
- 673 Chao, A. and Ricotta, C.: Quantifying evenness and linking it to diversity, beta diversity, and  
674 similarity, *Ecology*, 100, e02852, <https://doi.org/10.1002/ecy.2852>, 2019.
- 675 Chao, A., Chiu, C.-H., and Jost, L.: Unifying species diversity, phylogenetic diversity,  
676 functional diversity, and related similarity and differentiation measures through Hill numbers,  
677 *Annu. Rev. Ecol. Evol. Syst.*, 45, 297-324, [https://doi.org/10.1146/annurev-ecolsys-120213-](https://doi.org/10.1146/annurev-ecolsys-120213-091540)  
678 [091540](https://doi.org/10.1146/annurev-ecolsys-120213-091540), 2014a.
- 679 Chao, A., Gotelli, N. J., Hsieh, T., Sander, E. L., Ma, K., Colwell, R. K., and Ellison, A. M.:  
680 Rarefaction and extrapolation with Hill numbers: a framework for sampling and estimation in  
681 species diversity studies, *Ecol. Monogr.*, 84, 45-67, <https://doi.org/10.1890/13-0133.1>, 2014b.
- 682 Chao, A., Thorn, S., Chiu, C. H., Moyes, F., Hu, K. H., Chazdon, R. L., Wu, J., Magnago, L. F.  
683 S., Dornelas, M., and Zelený, D.: Rarefaction and extrapolation with beta diversity under a  
684 framework of Hill numbers: The iNEXT. beta3D standardization, *Ecol. Monogr.*, 93, e1588,  
685 <https://doi.org/10.1002/ecm.1588>, 2023.
- 686 Coimbra, J. C., Pinto, I. D., Wurdig, N. L., and do Carmo, D. A.: Zoogeography of Holocene  
687 Podocopina (Ostracoda) from the Brazilian equatorial shelf, *Mar. Micropaleontol.*, 37, 365-379,  
688 [https://doi.org/10.1016/S0377-8398\(99\)00025-0](https://doi.org/10.1016/S0377-8398(99)00025-0), 1999.
- 689 Coimbra, J. C., Ramos, M. I. F., Whatley, R. C., and Bergue, C. T.: The taxonomy and  
690 zoogeography of the family Trachyleberididae (Crustacea: Ostracoda) from the Equatorial  
691 Continental Shelf of Brazil, *J. Micropaleontol.*, 23, 107-118,  
692 <https://doi.org/10.1144/jm.23.2.107>, 2004.
- 693 Cowie, R. H. and Holland, B. S.: Dispersal is fundamental to biogeography and the evolution  
694 of biodiversity on oceanic islands, *J. Biogeogr.*, 33, 193-198, [https://doi.org/10.1111/j.1365-](https://doi.org/10.1111/j.1365-2699.2005.01383.x)  
695 [2699.2005.01383.x](https://doi.org/10.1111/j.1365-2699.2005.01383.x), 2006.
- 696 Cowman, P. F., Parravicini, V., Kulbicki, M., and Floeter, S. R.: The biogeography of tropical  
697 reef fishes: endemism and provinciality through time, *Biol. Rev.*, 92, 2112-2130,  
698 <https://doi.org/10.1111/brv.12323>, 2017.

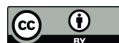

- 699 da Costa, L. M., Maia, H. A., and Almeida, A. J.: The fishes of the Gulf of Guinea oceanic  
700 islands, in: Biodiversity of the Gulf of Guinea Oceanic Islands: Science and Conservation.  
701 Cham: Springer International Publishing, edited by: Luis M. P. Ceriaco, R. F. d. L., Martim  
702 Melo, Rayna C. Bell, Springer, 431-478, 2022.
- 703 DeVantier, L., Turak, E., and Szava-Kovats, R.: Species richness and abundance of reef-  
704 building corals in the Indo-West Pacific: The local–regional relation revisited, *Frontiers in*  
705 *Marine Science*, 7, 487, <https://doi.org/10.3389/fmars.2020.00487>, 2020.
- 706 Dufrière, M. and Legendre, P.: Species assemblages and indicator species: the need for a flexible  
707 asymmetrical approach, *Ecol. Monogr.*, 67, 345-366, [https://doi.org/10.1890/0012-9615\(1997\)067\[0345:SAAI\]2.0.CO;2](https://doi.org/10.1890/0012-9615(1997)067[0345:SAAI]2.0.CO;2), 1997.
- 708 Fajemila, O. T. and Langer, M. R.: Spatial distribution and biogeographic significance of  
709 foraminiferal assemblages from Sao Tomé and Príncipe, Gulf of Guinea, West Africa, *Neues*  
710 *Jahrbuch für Geologie und Palaontologie-Abhandlungen*, 285, 337-360,  
711 <https://doi.org/10.1127/njgpa/2017/0686>, 2017.
- 712 Ferreira-Airaud, B., Schmitt, V., Vieira, S., Rio, M. J. d. C. d., Neto, E., and Pereira, J.: The sea  
713 turtles of São Tomé and Príncipe: diversity, distribution, and conservation status, in:  
714 Biodiversity of the Gulf of Guinea Oceanic Islands: Science and conservation, edited by: Luis  
715 M. P. Ceriaco, R. F. d. L., Martim Melo, Rayna C. Bell, Springer, 535-553, 2022.
- 716 Floeter, S. R., Rocha, L. A., Robertson, D. R., Joyeux, J., Smith-Vaniz, W. F., Wirtz, P., Edwards,  
717 A. J., Barreiros, J. P., Ferreira, C. E., and Gasparini, J. L.: Atlantic reef fish biogeography and  
718 evolution, *J. Biogeogr.*, 35, 22-47, <https://doi.org/10.1111/j.1365-2699.2007.01790.x>, 2008.
- 719 Friedlander, A. M., Ballesteros, E., Fay, M., and Sala, E.: Marine communities on oil platforms  
720 in Gabon, West Africa: high biodiversity oases in a low biodiversity environment, *PLoS One*,  
721 9, e103709, <https://doi.org/10.1371/journal.pone.0103709>, 2014.
- 722 Gordon, A. L.: The brawnier retroflection, *Nature*, 421, 904-905,  
723 <https://doi.org/10.1038/421904a>, 2003.
- 724 Grimditch, G. D., Tamelander, J., Mwaura, J., Zavagli, M., Takata, Y., and Gomez, T.: Coral  
725 reef resilience assessment of the Pemba channel conservation area, Tanzania, IUCN2009.
- 726 Hong, Y., Yasuhara, M., Iwatani, H., Harnik, P. G., Chao, A., Cybulski, J. D., Liu, Y., Ruan, Y.,  
727 Li, X., and Wei, C.-L.: Benthic ostracod diversity and biogeography in an urbanized seascape,  
728 *Mar. Micropaleontol.*, 174, 102067, <https://doi.org/10.1016/j.marmicro.2021.102067> 2022.
- 729 Kamiya, T.: Morphological and ethological adaptations of Ostracoda to microhabitats in  
730 Zostera beds, *Dev. Palaeontol. Stratigr.*, 11, 303-318, [https://doi.org/10.1016/S0920-5446\(08\)70191-2](https://doi.org/10.1016/S0920-5446(08)70191-2), 1988.
- 731 Keyser, D.: Ecology and zoogeography of recent brackish-water ostracoda (Crustacea) from  
732 south-west Florida, in: Aspects of ecology and zoogeography of recent and fossil Ostracoda,  
733 207-222, 1977.
- 734 Keyser, D. and Mohammed, M.: Taxonomy of recent shallow marine Ostracods from Al-  
735 Hudeida City-Yemen, *Mar. Micropaleontol.*, 164, 101974,  
736 <https://doi.org/10.1016/j.marmicro.2021.101974>, 2021.
- 737 Larsen, J., Maar, M., Rasmussen, M. L., Hansen, L. B., Hamad, I. Y., and Stæhr, P. A. U.: High-  
738 resolution hydrodynamics of coral reefs and tracing of pollutants from hotel areas along the  
739 west coast of Unguja Island, Zanzibar, *Mar. Pollut. Bull.*, 191, 114968,  
740 <https://doi.org/10.1016/j.marpolbul.2023.114968>, 2023.
- 741 Le Lœuff, P. and von Cosel, R.: Biodiversity patterns of the marine benthic fauna on the Atlantic  
742 coast of tropical Africa in relation to hydroclimatic conditions and paleogeographic events, *Acta*  
743 *Oecol.*, 19, 309-321, [https://doi.org/10.1016/S1146-609X\(98\)80035-0](https://doi.org/10.1016/S1146-609X(98)80035-0), 1998.
- 744 Leray, M. and Knowlton, N.: DNA barcoding and metabarcoding of standardized samples  
745 reveal patterns of marine benthic diversity, *Proc. Natl. Acad. Sci. USA.*, 112, 2076-2081,  
746 <https://doi.org/10.1073/pnas.1424997112>, 2015.
- 747 Losos, J. B. and Schluter, D.: Analysis of an evolutionary species–area relationship, *Nature*,  
748 408, 847-850, <https://doi.org/10.1038/35048558>, 2000.
- 749 Maia, H. A., Morais, R. A., Quimbayo, J. P., Dias, M. S., Sampaio, C. L., Horta, P. A., Ferreira,  
750 C. E. L., and Floeter, S. R.: Spatial patterns and drivers of fish and benthic reef communities at



- 753 São Tomé Island, Tropical Eastern Atlantic, *Mar. Ecol.*, 39, e12520,  
754 <https://doi.org/10.1111/maec.12520>, 2018.
- 755 Mamo, B. L., Cybulski, J. D., Hong, Y., Harnik, P. G., Chao, A., Tsujimoto, A., Wei, C.-L.,  
756 Baker, D. M., and Yasuhara, M.: Modern biogeography of benthic foraminifera in an urbanized  
757 tropical marine ecosystem, Geological Society, London, Special Publications, 529, SP529-  
758 2022-2175, <https://doi.org/10.1144/SP529-2022-175>, 2023.
- 759 Narayan, G. R., Herrán, N., Reymond, C. E., Shaghude, Y. W., and Westphal, H.: Local  
760 Persistence of Large Benthic Foraminifera (LBF) under Increasing Urban Development: A Case  
761 Study from Zanzibar (Unguja), East Africa, *J. Earth Sci.*, 33, 1434-1450,  
762 <https://doi.org/10.1007/s12583-022-1702-5>, 2022.
- 763 Obura, D.: The diversity and biogeography of Western Indian Ocean reef-building corals, *PLOS*  
764 *ONE*, e45013, <https://doi.org/10.1371/journal.pone.0045013>, 2012.
- 765 Omatsola, M. E.: Recent and subrecent Trachyleberididae and Hemicytheridae (Ostr., Crust)  
766 from the Western Niger Delta, Nigeria, *Bull. geol. Instn Univ. Upsala*, 3, 37-120, 1972.
- 767 Otero-Ferrer, F., Tuya, F., Bosch Guerra, N. E., Herrero-Barrencua, A., Abreu, A., and Haroun,  
768 R.: Composition, structure and diversity of fish assemblages across seascape types at Príncipe,  
769 an understudied tropical island in the Gulf of Guinea (eastern Atlantic Ocean), *Afr. J. Mar. Sci.*,  
770 42, 381-391, <https://doi.org/10.2989/1814232X.2020.1826358>, 2020.
- 771 Polidoro, B. A., Ralph, G. M., Strongin, K., Harvey, M., Carpenter, K. E., Arnold, R., Buchanan,  
772 J. R., Camara, K. M. A., Collette, B. B., and Comeros-Raynal, M. T.: The status of marine  
773 biodiversity in the Eastern Central Atlantic (West and Central Africa), *Aquat. Conserv.: Mar.*  
774 *Freshwat. Ecosyst.*, 27, 1021-1034, <https://doi.org/10.1002/aqc.2744>, 2017.
- 775 Porriños, G., Metcalfe, K., Nuno, A., da Graça, M., Walker, K., Dixon, A., Guedes, M., Nazaré,  
776 L., Dos Santos, A., and Colman, L. P.: Fish community composition in the tropical archipelago  
777 of São Tomé and Príncipe, *PloS one*, 19, e0312849,  
778 <https://doi.org/10.1371/journal.pone.0312849>, 2024.
- 779 Prazeres, M. and Renema, W.: Evolutionary significance of the microbial assemblages of large  
780 benthic Foraminifera, *Biol. Rev.*, 94, 828-848, <https://doi.org/10.1111/brv.12482>, 2019.
- 781 Purper, I. and de Orenellas, L. P.: The genus *Paracytheridea* (Ostracoda) in the  
782 northern/northwestern Brazilian continental shelf, *Pesquisas em Geociências*, 20, 103-124,  
783 <https://doi.org/10.22456/1807-9806.21675>, 1987.
- 784 Reagan, J. R., Seidov, D., Wang, Z., Dukhovskoy, D., Boyer, T. P., Locarnini, R. A., Baranova,  
785 O. K., Mishonov, A. V., Garcia, H. E., and Bouchard, C.: World ocean atlas 2023 [dataset],  
786 2024.
- 787 RStudio, T.: RStudio: Integrated development for R [Computer software]. Boston, MA:  
788 RStudio, Inc, 2016.
- 789 Sridhar, S., Hussain, S., Periakali, P., and Kumar, V.: Ostracod *Kotoracythere inconspicua*  
790 (Brady) from the Palk Bay, off Rameswaram, Southeast Coast of India: Its Zoogeography and  
791 Ecology, *Journal Geological Society of India*, 70, 981-986, 2007.
- 792 Thissen, J. and Langer, M.: Spatial Patterns and Structural Composition of Foraminiferal  
793 Assemblages from the Zanzibar Archipelago (Tanzania), *Palaeontographica Abteilung A*, 308,  
794 1-67, <https://doi.org/10.1127/pala/308/2017/1>, 2017.
- 795 Tian, S. Y., Langer, M., Yasuhara, M., and Wei, C.-L.: Reefal ostracod assemblages from the  
796 Zanzibar Archipelago (Tanzania), *Biogeosciences*, 21, 3523-3536, <https://doi.org/10.5194/bg-21-3523-2024>, 2024a.
- 798 Tian, S. Y., Yasuhara, M., Condamine, F. L., Huang, H.-H. M., Fernando, A. G. S., Aguilar, Y.  
799 M., Pandita, H., Irizuki, T., Iwatani, H., Shin, C. P., Renema, W., and Kase, T.: Cenozoic history  
800 of the tropical marine biodiversity hotspot, *Nature*, 632, 343-349,  
801 <https://doi.org/10.1038/s41586-024-07617-4>, 2024b.
- 802 Tittensor, D. P., Mora, C., Jetz, W., Lotze, H. K., Ricard, D., Berghe, E. V., and Worm, B.:  
803 Global patterns and predictors of marine biodiversity across taxa, *Nature*, 466, 1098,  
804 <https://doi.org/10.1038/nature09329>, 2010.
- 805 Titterton, R. and Whatley, R.: Recent Bairdiinae (Crustacea, Ostracoda) from the Solomon  
806 Islands, *J. Micropalaeontol.*, 7, 111-142, <https://doi.org/10.1144/jm.7.2.111>, 1988.



807 Townsend, C. R., Scarsbrook, M. R., and Dolédec, S.: The intermediate disturbance hypothesis,  
808 refugia, and biodiversity in streams, *Limnol. Oceanogr.*, 42, 938-949,  
809 <https://doi.org/10.4319/lo.1997.42.5.0938>, 1997.

810 Tuya, F., Herrero-Barrencia, A., Bosch, N., Abreu, A., and Haroun, R.: Reef fish at a remote  
811 tropical island (Principe Island, Gulf of Guinea): disentangling taxonomic, functional and  
812 phylogenetic diversity patterns with depth, *Marine and Freshwater Research*, 69, 395-402,  
813 <https://doi.org/10.1071/MF17233>, 2017.

814 Viljur, M. L., Abella, S. R., Adámek, M., Alencar, J. B. R., Barber, N. A., Beudert, B., Burkle,  
815 L. A., Cagnolo, L., Campos, B. R., and Chao, A.: The effect of natural disturbances on forest  
816 biodiversity: an ecological synthesis, *Biol. Rev.*, 97, 1930-1947,  
817 <https://doi.org/10.1111/brv.12876>, 2022.

818 Whatley, R. C. and Watson, K.: A preliminary account of the distribution of Ostracoda in recent  
819 reef and reef associated environments in the Pulau Seribu or Thousand Island Group, Java Sea,  
820 *Dev. Palaeontol. Stratigr.*, 11, 399-411, [https://doi.org/10.1016/S0920-5446\(08\)70197-3](https://doi.org/10.1016/S0920-5446(08)70197-3), 1988.

821 Witman, J. D., Etter, R. J., and Smith, F.: The relationship between regional and local species  
822 diversity in marine benthic communities: a global perspective, *Proc. Natl. Acad. Sci. USA.*, 101,  
823 15664-15669, <https://doi.org/10.1073/pnas.0404300101>, 2004.

824 Wood, S. N.: Generalized additive models, *Annual Review of Statistics and its Application*, 12,  
825 497-526, <https://doi.org/10.1146/annurev-statistics-112723-034249>, 2024.

826 Wouters, K.: On the modern distribution of the euryhaline species *Cyprideis torosa* (Jones,  
827 1850)(Crustacea, Ostracoda), *J. Micropalaeontol.*, 36, 21-30,  
828 <https://doi.org/10.6084/m9.figshare.c.3149791.v1>, 2017.

829 Yasuhara, M., Tittensor, D. P., Hillebrand, H., and Worm, B.: Combining marine macroecology  
830 and palaeoecology in understanding biodiversity: microfossils as a model, *Biol. Rev.*, 92, 199-  
831 215, <https://doi.org/10.1111/brv.12223>, 2017.

832

833

834

835

836

837

838

839

840

841

842

843

844
